# Supplementary material for: Evaluation of substituent bioactivity and anion impact of linear and T-shaped silver(i) pyridinyl complexes as potential antiproliferative, antioxidant, antimicrobial agents and DNA- and BSA-binders
Source: Royal Society of Chemistry journal article supplement (doi:10.1039/d1nj03231c), 2021-01-01
Supplement: d1nj03231c1.pdf [file d1nj03231c1.pdf]

## Evaluation of substituent-bioactivity and anion impact of linear and T-shaped Silver(I) pyridinyl complexes as potential antiproliferative, antioxidant, antimicrobial agents and DNA- and BSA- binders

Adesola A. Adeleke,<sup>1,2</sup> Md. Shahidul Islam,<sup>3</sup> Kolawole Olofinisan,<sup>3</sup> Veronica F. Salau,<sup>3</sup> Chunderika Mocktar<sup>4</sup> and Bernard Omondi\*<sup>1</sup>

<sup>1</sup> School of Chemistry and Physics, University of Kwazulu-Natal, Pietermaritzburg Campus, Private Bag X01, Scottsville 3209, South Africa

<sup>2</sup> Department of Chemical Sciences, Olabisi Onabanjo University, Ago-Iwoye, P. M. B. 2002, Nigeria

<sup>3</sup> Discipline of Biochemistry, School of Life Sciences, University of Kwazulu-Natal, Westville Campus, Private Bag X54001, Durban 4000, South Africa

<sup>4</sup> Discipline of Pharmaceutical Sciences, School of Health Sciences, University of Kwazulu-Natal, Westville Campus, Private Bag X54001, Durban 4000, South Africa

\*Corresponding author.

E-mail address: owaga@ukzn.ac.za <http://orcid.org/0000-0002-3003-6712>.

### Supplementary information

| Table of Contents                                                                                                                                                                                                                                                                                                         | Page |
|---------------------------------------------------------------------------------------------------------------------------------------------------------------------------------------------------------------------------------------------------------------------------------------------------------------------------|------|
| <b>Table S1:</b> <sup>1</sup> H-NMR chemical shifts of some protons in E <sub>a-d</sub> complexes <b>1–12</b> and the IR band of (C=N) and pyridinyl N for E <sub>a-d</sub> complexes <b>1–12</b>                                                                                                                         | 7    |
| <b>Table S2:</b> <sup>15</sup> N NMR chemical shifts of E <sub>a-d</sub> and selected complexes ( <b>2, 7, 8</b> and <b>9</b> )                                                                                                                                                                                           | 8    |
| <b>Table S3:</b> Physical and chemical data of Silver(I) complexes <b>1–12</b>                                                                                                                                                                                                                                            | 8    |
| <b>Figure S1:</b> Electronic Absorption Spectra of Ligand E <sub>a</sub> at 2.0 x 10 <sup>-5</sup> M in the absence (dashed line) and the presence of different concentrations of CT-DNA (0 – 3.0 x 10 <sup>5</sup> M) at 285 nm λ <sub>max</sub> . (inset) A stern-volmer plot of E <sub>a</sub> interaction with CT-DNA | 9    |
| <b>Figure S2:</b> Electronic Absorption Spectra of Ligand E <sub>b</sub> at 2.0 x 10 <sup>-5</sup> M in the absence (dashed line) and the presence of different concentrations of CT-DNA (0 – 3.0 x 10 <sup>5</sup> M) at 302 nm λ <sub>max</sub> . (inset) A stern-volmer plot of E <sub>b</sub> interaction with CT-DNA | 9    |
| <b>Figure S3:</b> Electronic Absorption Spectra of Ligand E <sub>c</sub> at 2.0 x 10 <sup>-5</sup> M in the absence (dashed line) and the presence of different concentrations of CT-DNA (0 – 3.0 x 10 <sup>5</sup> M) at 327 nm λ <sub>max</sub> . (inset) A stern-volmer plot of E <sub>c</sub> interaction with CT-DNA | 10   |
| <b>Figure S4:</b> Electronic Absorption Spectra of Ligand E <sub>d</sub> at 2.0 x 10 <sup>-5</sup> M in the absence (dashed line) and the presence of different concentrations of CT-DNA (0 – 3.0 x 10 <sup>5</sup> M) at 333 nm λ <sub>max</sub> . (inset) A stern-volmer plot of E <sub>d</sub> interaction with CT-DNA | 10   |
| <b>Figure S5:</b> Electronic Absorption Spectra of complex <b>2</b> at 2.0 x 10 <sup>-5</sup> M in the absence (dashed line) and the presence of different concentrations of CT-DNA (0 – 3.0 x 10 <sup>5</sup> M) at 306 nm λ <sub>max</sub> . (inset) A stern-volmer plot of <b>2</b> interaction with CT-DNA            | 11   |

- Figure S6:** Electronic Absorption Spectra of complex **3** at  $2.0 \times 10^{-5}$  M in the absence (dashed line) and the presence of different concentrations of CT-DNA ( $0 - 3.0 \times 10^5$  M) at 330 nm  $\lambda_{\text{max}}$ . (inset) A stern-volmer plot of **3** interaction with CT-DNA 11
- Figure S7:** Electronic Absorption Spectra of complex **4** at  $2.0 \times 10^{-5}$  M in the absence (dashed line) and the presence of different concentrations of CT-DNA ( $0 - 3.0 \times 10^5$  M) at 332 nm  $\lambda_{\text{max}}$ . (inset) A stern-volmer plot of **4** interaction with CT-DNA 12
- Figure S8:** Electronic Absorption Spectra of complex **5** at  $2.0 \times 10^{-5}$  M in the absence (dashed line) and the presence of different concentrations of CT-DNA ( $0 - 3.0 \times 10^5$  M) at 285 nm  $\lambda_{\text{max}}$ . (inset) A stern-volmer plot of **5** interaction with CT-DNA 13
- Figure S9:** Electronic Absorption Spectra of complex **6** at  $2.0 \times 10^{-5}$  M in the absence (dashed line) and the presence of different concentrations of CT-DNA ( $0 - 3.0 \times 10^5$  M) at 306 nm  $\lambda_{\text{max}}$ . (inset) A stern-volmer plot of **6** interaction with CT-DNA 13
- Figure S10:** Electronic Absorption Spectra of complex **7** at  $2.0 \times 10^{-5}$  M in the absence (dashed line) and the presence of different concentrations of CT-DNA ( $0 - 3.0 \times 10^5$  M) at 328 nm  $\lambda_{\text{max}}$ . (inset) A stern-volmer plot of **7** interaction with CT-DNA 14
- Figure S11:** Electronic Absorption Spectra of complex **8** at  $2.0 \times 10^{-5}$  M in the absence (dashed line) and the presence of different concentrations of CT-DNA ( $0 - 3.0 \times 10^5$  M) at 332 nm  $\lambda_{\text{max}}$ . (inset) A stern-volmer plot of **8** interaction with CT-DNA 14
- Figure S12:** Electronic Absorption Spectra of complex **9** at  $2.0 \times 10^{-5}$  M in the absence (dashed line) and the presence of different concentrations of CT-DNA ( $0 - 3.0 \times 10^5$  M) at 282 nm  $\lambda_{\text{max}}$ . (inset) A stern-volmer plot of **9** interaction with CT-DNA 15
- Figure S13:** Electronic Absorption Spectra of complex **10** at  $2.0 \times 10^{-5}$  M in the absence (dashed line) and the presence of different concentrations of CT-DNA ( $0 - 3.0 \times 10^5$  M) at 300 nm  $\lambda_{\text{max}}$ . (inset) A stern-volmer plot of **10** interaction with CT-DNA 15
- Figure S14:** Electronic Absorption Spectra of complex **11** at  $2.0 \times 10^{-5}$  M in the absence (dashed line) and the presence of different concentrations of CT-DNA ( $0 - 3.0 \times 10^5$  M) at 331 nm  $\lambda_{\text{max}}$ . (inset) A stern-volmer plot of **11** interaction with CT-DNA 16
- Figure S15: Electronic Absorption Spectra of complex **12** at  $2.0 \times 10^{-5}$  M in the absence (dashed line) and the presence of different concentrations of CT-DNA ( $0 - 3.0 \times 10^5$  M) at 340 nm  $\lambda_{\text{max}}$ . (inset) A stern-volmer plot of **12** interaction with CT-DNA 16
- Figure S16:** The Fluorescence spectra of EB-CT-DNA in the absence (dashed line) and the presence of different concentration of complex **3**. (inset) Stern-Volmer plot of **3** interactions with EB-CT- DNA 17
- Figure S17:** The Fluorescence spectra of EB-CT-DNA in the absence (dashed line) and the presence of different concentration of complex **4**. (inset) Stern-Volmer plot of **4** interaction with EB-CT- DNA 17
- Figure S18:** The Fluorescence spectra of EB-CT-DNA in the absence (dashed line) and the presence of different concentrations s of complex **5**. (inset) Stern-Volmer plot of **5** interaction with EB-CT- DNA 18
- Figure S19:** The Fluorescence spectra of EB-CT-DNA in the absence (dashed line) and the presence of different concentrations of complex **7**. (inset) Stern-Volmer plot of **7** interaction with EB-CT- DNA 18
- Figure S20:** The Fluorescence spectra of EB-CT-DNA in the absence (dashed line) and the presence of different concentration of complex **8**. (inset) Stern-Volmer plot of **8** interaction with EB-CT- DNA 19

**Figure S21:** The Fluorescence spectra of EB-CT-DNA in the absence (dashed line) and the presence of different concentrations of complex **9**. (inset) Stern-Volmer plot of **9** interaction with EB-CT- DNA 19

**Figure S22:** The Fluorescence spectra of EB-CT-DNA in the absence (dashed line) and the presence of different concentrations of complex **11**. (inset) Stern-Volmer plot of **11** interaction with EB-CT- DNA 20

**Figure S23:** The Fluorescence spectra of EB-CT-DNA in the absence (dashed line) and the presence of different concentrations of complex **12**. (inset) Stern-Volmer plot of **12** interaction with EB-CT- DNA 20

**Figure S24:** The Fluorescence spectra of Hoechst 33342-CT-DNA in the absence (dashed line) and the presence of different concentrations of complex **6**. (inset) Stern-Volmer plot of **6** interaction with Hoechst 33342-CT-DNA 21

**Figure S25:** The Fluorescence spectra of Hoechst 33342-CT-DNA in the absence (dashed line) and the presence of different concentration of complex **10**. (inset) Stern-Volmer plot of **10** interaction with Hoechst 33342-CT-DNA 21

### **The double-logarithmic plot of EB-CT-DNA–Complexes interactions at room temperature.** 22

**Figure S26:** The double-logarithmic plot of EB-CT-DNA–Complex **1** interaction at room temperature. 22

**Figure S27:** The double-logarithmic plot of EB-CT-DNA–Complex **4** interaction at room temperature. 22

**Figure S28:** The double-logarithmic plot of EB-CT-DNA–Complex **5** interaction at room temperature. 23

**Figure S29:** The double-logarithmic plot of EB-CT-DNA–Complex **7** interaction at room temperature. 23

**Figure S30:** The double-logarithmic plot of EB-CT-DNA–Complex **8** interaction at room temperature. 24

**Figure S31:** The double-logarithmic plot of EB-CT-DNA–Complex **9** interaction at room temperature. 24

**Figure S32:** The double-logarithmic plot of EB-CT-DNA–Complex **11** interaction at room temperature. 25

**Figure S33:** The double-logarithmic plot of EB-CT-DNA–Complex **12** interaction at room temperature. 25

**Figure S34:** The double-logarithmic plot of Hoechst 33342-CT-DNA –Complex **2** interaction at room temperature. 26

**Figure S35:** The double-logarithmic plot of Hoechst 33342-CT-DNA –Complex **6** interaction at room temperature. 27

**Figure S36:** The double-logarithmic plot of Hoechst 33342-CT-DNA–Complex **10** interaction at room temperature. 27

### **BSA Binding studies using Electronic Absorption method** 27

**Figure S37:** Electronic Absorption Spectra of BSA in the absence (dashed line) and the presence of different concentrations of complexes **1**. (inset) Plot of  $1/(A_0 - A)$  vs.  $1/[\text{Complex}] \times 10^{-4} \text{ M}^{-1}$  28

**Figure S38:** Electronic Absorption Spectra of BSA in the absence (dashed line) and the presence of different concentrations of complexes **2**. (inset) Plot of  $1/(A_0 - A)$  vs.  $1/[\text{Complex}] \times 10^{-4} \text{ M}^{-1}$  28

Figure S39: Electronic Absorption Spectra of BSA in the absence (dashed line) and the presence of different concentrations of complex **3**. (inset) plot of  $3 \cdot 1/(A-A_0)$  vs.  $1/[\text{Complex}] \times 10^{-4} \text{ M}^{-1}$  29

**Figure S40:** Electronic Absorption Spectra of BSA in the absence (dashed line) and the presence of different concentrations of complexes **4**. (inset) Plot of  $1/(A_0 - A)$  vs.  $1/[\text{Complex}] \times 10^{-4} \text{ M}^{-1}$  29

**Figure S41:** Electronic Absorption Spectra of BSA in the absence (dashed line) and the presence of different concentrations of complexes **5**. (inset) Plot of  $1/(A_0 - A)$  vs.  $1/[\text{Complex}] \times 10^{-4} \text{ M}^{-1}$  30

**Figure S42:** Electronic Absorption Spectra of BSA in the absence (dashed line) and the presence of different concentrations of complexes **6**. (inset) Plot of  $1/(A_0 - A)$  vs.  $1/[\text{Complex}] \times 10^{-4} \text{ M}^{-1}$  30

**Figure S43:** Electronic Absorption Spectra of BSA in the absence (dashed line) and the presence of different concentrations of complexes **7**. (inset) Plot of  $1/(A_0 - A)$  vs.  $1/[\text{Complex}] \times 10^{-4} \text{ M}^{-1}$  31

**Figure S44:** Electronic Absorption Spectra of BSA in the absence (dashed line) and the presence of different concentrations of complexes **8**. (inset) Plot of  $1/(A_0 - A)$  vs.  $1/[\text{Complex}] \times 10^{-4} \text{ M}^{-1}$  31

**Figure S45:** Electronic Absorption Spectra of BSA in the absence (dashed line) and the presence of different concentrations of complexes **9**. (inset) Plot of  $1/(A_0 - A)$  vs.  $1/[\text{Complex}] \times 10^{-4} \text{ M}^{-1}$  32

**Figure S46:** Electronic Absorption Spectra of BSA in the absence (dashed line) and the presence of different concentrations of complexes **11**. (inset) Plot of  $1/(A_0 - A)$  vs.  $1/[\text{Complex}] \times 10^{-4} \text{ M}^{-1}$  32

**Figure S47:** Electronic Absorption Spectra of BSA in the absence (dashed line) and the presence of different concentrations of complexes **12**. (inset) Plot of  $1/(A_0 - A)$  vs.  $1/[\text{Complex}] \times 10^{-4} \text{ M}^{-1}$  33

## **BSA Binding studies using the Fluorescence method** 33

**Figure S48:** Fluorescence emission spectra of BSA in the absence(dashed line) and the presence of different concentration of complex **2**. (inset) Stern-Volmer plot of complex **2** interaction with BSA 33

**Figure S49:** Fluorescence emission spectra of BSA in the absence(dashed line) and the presence of different concentrations of complex **3**. (inset) Stern-Volmer plot of complex **3** interaction with BSA. 34

**Figure S50:** Fluorescence emission spectra of BSA in the absence(dashed line) and the presence of different concentrations of complex **6**. (inset) Stern-Volmer plot of complex **6** interaction with BSA 34

**Figure S51:** Fluorescence emission spectra of BSA in the absence(dashed line) and the presence of different concentrations of complex **10**. (inset) Stern-Volmer plot of complex **10** interaction with BSA 35

**Figure S52:** Fluorescence emission spectra of BSA in the absence(dashed line) and the presence of different concentrations of complex **11**. (inset) Stern-Volmer plot of complex **11** interaction with BSA 35

|                                                                                                                                                                                                                             |    |
|-----------------------------------------------------------------------------------------------------------------------------------------------------------------------------------------------------------------------------|----|
| <b>Figure S53:</b> Fluorescence emission spectra of BSA in the absence(dashed line) and the presence of different concentration of complex <b>1</b>                                                                         | 36 |
| <b>Figure S54:</b> Fluorescence emission spectra of BSA in the absence(dashed line) and the presence of different concentrations of complex <b>4</b> .                                                                      | 36 |
| <b>Figure S55:</b> Fluorescence emission spectra of BSA in the absence(dashed line) and the presence of different concentration of complex <b>5</b>                                                                         | 37 |
| <b>Figure S56:</b> Fluorescence emission spectra of BSA in the absence(dashed line) and the presence of different concentrations of complex <b>8</b> .                                                                      | 37 |
| <b>Figure S57:</b> Fluorescence emission spectra of BSA in the absence(dashed line) and the presence of different concentrations of complex <b>9</b> . (inset) Stern-Volmer plot of complex <b>9</b> interaction with BSA   | 38 |
| <b>Figure S58:</b> Fluorescence emission spectra of BSA in the absence(dashed line) and the presence of different concentrations of complex <b>12</b> . (inset) Stern-Volmer plot of complex <b>12</b> interaction with BSA | 38 |
| <b>The double-logarithmic plot of BSA–Complexes interactions at room temperature.</b>                                                                                                                                       | 38 |
| <b>Figure S59:</b> The double-logarithmic plot of BSA–Complex <b>2</b> interactions.                                                                                                                                        | 39 |
| <b>Figure S60:</b> The double-logarithmic plot of BSA–Complex <b>3</b> interactions.                                                                                                                                        | 39 |
| <b>Figure S61:</b> The double-logarithmic plot of BSA–Complex <b>6</b> interactions                                                                                                                                         | 40 |
| <b>Figure S62:</b> The double-logarithmic plot of BSA–Complex <b>7</b> interactions                                                                                                                                         | 40 |
| <b>Figure S63:</b> The double-logarithmic plot of BSA–Complex <b>11</b> interactions                                                                                                                                        | 41 |
| <b><sup>1</sup>H-NMR Spectra of Ligands E<sub>a-d</sub></b>                                                                                                                                                                 | 42 |
| Figure S64: E)-2-((pyridin-4-ylmethylene)amino)phenol E <sub>a</sub>                                                                                                                                                        | 42 |
| Figure S65: 2-(pyridin-4-yl)benzo[ <i>d</i> ]thiazole E <sub>b</sub>                                                                                                                                                        | 43 |
| Figure S66: (E)-N-(2-fluorophenyl)-1-(pyridin-4-yl)methanimine E <sub>c</sub>                                                                                                                                               | 43 |
| Figure S67: (E)-1-(pyridin-4-yl)-N-( <i>p</i> -tolyl)methanimine E <sub>d</sub>                                                                                                                                             | 43 |
| <b><sup>1</sup>H-NMR SPECTRA OF COMPLEXES 1-12</b>                                                                                                                                                                          | 44 |
| Figure S68: [Ag(E <sub>a</sub> ) <sub>2</sub> ]NO <sub>3</sub> 1                                                                                                                                                            | 44 |
| Figure S69: [Ag(E <sub>b</sub> ) <sub>2</sub> ]NO <sub>3</sub> 2                                                                                                                                                            | 44 |
| Figure S70: [Ag(E <sub>c</sub> ) <sub>2</sub> ]NO <sub>3</sub> 3                                                                                                                                                            | 45 |
| Figure S71: [Ag(E <sub>d</sub> ) <sub>2</sub> ]NO <sub>3</sub> 4                                                                                                                                                            | 45 |
| Figure S72: [Ag(E <sub>a</sub> ) <sub>2</sub> ]ClO <sub>4</sub> 5                                                                                                                                                           | 46 |
| Figure S73: [Ag(E <sub>b</sub> ) <sub>2</sub> ]ClO <sub>4</sub> 6                                                                                                                                                           | 46 |
| Figure S74: [Ag(E <sub>c</sub> ) <sub>2</sub> ]ClO <sub>4</sub> 7                                                                                                                                                           | 47 |
| Figure S75: [Ag(E <sub>d</sub> ) <sub>2</sub> ]ClO <sub>4</sub> 8                                                                                                                                                           | 47 |
| Figure S76: [Ag(E <sub>a</sub> ) <sub>2</sub> ]CF <sub>3</sub> SO <sub>3</sub> 9                                                                                                                                            | 48 |
| Figure S77: [Ag(E <sub>b</sub> ) <sub>2</sub> ]CF <sub>3</sub> SO <sub>3</sub> 10                                                                                                                                           | 48 |
| Figure S78: [Ag(E <sub>c</sub> ) <sub>2</sub> ]CF <sub>3</sub> SO <sub>3</sub> 11                                                                                                                                           | 49 |
| Figure S79: [Ag(E <sub>d</sub> ) <sub>2</sub> ]CF <sub>3</sub> SO <sub>3</sub> 12                                                                                                                                           | 49 |
| <b>Figure S80: Time dependent <sup>1</sup>H NMR spectra of [Ag(E<sub>a</sub>)<sub>2</sub>]NO<sub>3</sub></b> 1                                                                                                              | 50 |
| <b>Figure S81: Time dependent <sup>1</sup>H NMR spectra of [Ag(E<sub>b</sub>)<sub>2</sub>]ClO<sub>4</sub></b> 6                                                                                                             | 50 |
| <b>Figure S82: Time dependent <sup>1</sup>H NMR spectra of [Ag(E<sub>c</sub>)<sub>2</sub>]ClO<sub>4</sub></b> 7                                                                                                             | 51 |

|                                                                                                                            |           |           |
|----------------------------------------------------------------------------------------------------------------------------|-----------|-----------|
| <b>Figure S83: Time dependent <sup>1</sup>H NMR spectra of [Ag(E<sub>d</sub>)<sub>2</sub>]CF<sub>3</sub>SO<sub>3</sub></b> | <b>12</b> | <b>51</b> |
| <b><sup>15</sup>N-NMR SPECTRA OF E<sub>a-d</sub></b>                                                                       |           | <b>52</b> |
| Figure S84: <sup>15</sup> N NMR spectrum of E)-2-((pyridin-4-ylmethylene)amino)phenol E <sub>a</sub>                       |           | 52        |
| Figure S85: <sup>15</sup> N NMR spectrum of 2-(pyridin-4-yl)benzo[ <i>d</i> ]thiazole E <sub>b</sub>                       |           | 53        |
| Figure S86: <sup>15</sup> N NMR spectrum of (E)-N-(2-fluorophenyl)-1-(pyridin-4-yl)methanimine E <sub>c</sub>              | 53        |           |
| Figure S87: <sup>15</sup> N NMR spectrum of (E)-1-(pyridin-4-yl)-N-(p-tolyl)methanimine E <sub>d</sub>                     |           | 54        |
| Figure S88: <sup>15</sup> N NMR spectrum of [Ag(E <sub>b</sub> ) <sub>2</sub> ]NO <sub>3</sub>                             | 2         | 54        |
| Figure S89: <sup>15</sup> N NMR spectrum of [Ag(E <sub>c</sub> ) <sub>2</sub> ]ClO <sub>4</sub>                            | 7         | 55        |
| Figure S90: <sup>15</sup> N NMR spectrum of [Ag(E <sub>d</sub> ) <sub>2</sub> ]ClO <sub>4</sub>                            | 8         | 55        |
| Figure S91: <sup>15</sup> N NMR spectrum of [Ag(E <sub>a</sub> ) <sub>2</sub> ]CF <sub>3</sub> SO <sub>3</sub>             | 9         | 55        |
| <b><sup>13</sup>C-NMR SPECTRA OF E<sub>a-d</sub></b>                                                                       |           | <b>56</b> |
| Figure S92: E)-2-((pyridin-4-ylmethylene)amino)phenol E <sub>a</sub>                                                       |           | 56        |
| Figure S94: 2-(pyridin-4-yl)benzo[ <i>d</i> ]thiazole E <sub>b</sub>                                                       |           | 57        |
| Figure S95: (E)-N-(2-fluorophenyl)-1-(pyridin-4-yl)methanimine E <sub>c</sub>                                              |           | 58        |
| Figure S96: (E)-1-(pyridin-4-yl)-N-(p-tolyl)methanimine E <sub>d</sub>                                                     |           | 58        |
| <b><sup>13</sup>C-NMR SPECTRA OF COMPLEXES 1-12</b>                                                                        |           | <b>59</b> |
| Figure S97: [Ag(E <sub>a</sub> ) <sub>2</sub> ]NO <sub>3</sub>                                                             | 1         | 59        |
| Figure S98: [Ag(E <sub>b</sub> ) <sub>2</sub> ]NO <sub>3</sub>                                                             | 2         | 59        |
| Figure S99: [Ag(E <sub>c</sub> ) <sub>2</sub> ]NO <sub>3</sub>                                                             | 3         | 60        |
| Figure S100: [Ag(E <sub>d</sub> ) <sub>2</sub> ]NO <sub>3</sub>                                                            | 4         | 60        |
| Figure S101: [Ag(E <sub>a</sub> ) <sub>2</sub> ]ClO <sub>4</sub>                                                           | 5         | 61        |
| Figure S102: [Ag(E <sub>b</sub> ) <sub>2</sub> ]ClO <sub>4</sub>                                                           | 6         | 61        |
| Figure S103: [Ag(E <sub>c</sub> ) <sub>2</sub> ]ClO <sub>4</sub>                                                           | 7         | 62        |
| Figure S104: [Ag(E <sub>d</sub> ) <sub>2</sub> ]ClO <sub>4</sub>                                                           | 8         | 62        |
| Figure S105: [Ag(E <sub>a</sub> ) <sub>2</sub> ]CF <sub>3</sub> SO <sub>3</sub>                                            | 9         | 63        |
| Figure S106: [Ag(E <sub>b</sub> ) <sub>2</sub> ]CF <sub>3</sub> SO <sub>3</sub>                                            | 10        | 63        |
| Figure S107: [Ag(E <sub>c</sub> ) <sub>2</sub> ]CF <sub>3</sub> SO <sub>3</sub>                                            | 11        | 64        |
| Figure S108: [Ag(E <sub>d</sub> ) <sub>2</sub> ]CF <sub>3</sub> SO <sub>3</sub>                                            | 12        | 64        |
| <b>IR SPECTRA OF LIGANDS E<sub>a-d</sub></b>                                                                               |           | <b>65</b> |
| Figure S109: (E)-2-((pyridin-4-ylmethylene)amino)phenol E <sub>a</sub>                                                     |           | 65        |
| Figure S110: 2-(pyridin-4-yl)benzo[ <i>d</i> ]thiazole E <sub>b</sub>                                                      |           | 65        |
| Figure S111: (E)-N-(2-fluorophenyl)-1-(pyridin-4-yl)methanimine E <sub>c</sub>                                             |           | 66        |
| Figure S112: (E)-1-(pyridin-4-yl)-N-(p-tolyl)methanimine E <sub>d</sub>                                                    |           | 66        |
| <b>IR SPECTRA OF COMPLEXES 1-12</b>                                                                                        |           | <b>67</b> |
| Figure S113: [Ag(E <sub>a</sub> ) <sub>2</sub> ]NO <sub>3</sub>                                                            | 1         | 67        |
| Figure S114: [Ag(E <sub>b</sub> ) <sub>2</sub> ]NO <sub>3</sub>                                                            | 2         | 67        |
| Figure S115: [Ag(E <sub>c</sub> ) <sub>2</sub> ]NO <sub>3</sub>                                                            | 3         | 68        |
| Figure S116: [Ag(E <sub>d</sub> ) <sub>2</sub> ]NO <sub>3</sub>                                                            | 4         | 68        |

|                                                                                  |    |    |
|----------------------------------------------------------------------------------|----|----|
| Figure S117: [Ag(E <sub>a</sub> ) <sub>2</sub> ]ClO <sub>4</sub>                 | 5  | 69 |
| Figure S118: [Ag(E <sub>b</sub> ) <sub>2</sub> ]ClO <sub>4</sub>                 | 6  | 69 |
| Figure S119: [Ag(E <sub>c</sub> ) <sub>2</sub> ]ClO <sub>4</sub>                 | 7  | 70 |
| Figure S121: [Ag(E <sub>a</sub> ) <sub>2</sub> ]CF <sub>3</sub> SO <sub>3</sub>  | 9  | 71 |
| Figure S122: [Ag(E <sub>b</sub> ) <sub>2</sub> ]CF <sub>3</sub> SO <sub>3</sub>  | 10 | 71 |
| Figure S123: [Ag(E <sub>c</sub> ) <sub>2</sub> ]CF <sub>3</sub> SO <sub>3</sub>  | 11 | 72 |
| Figure S124: [Ag(E <sub>d</sub> ) <sub>2</sub> ]CF <sub>3</sub> SO <sub>3</sub>  | 12 | 72 |
| <b>Mass Spectra of Ligands E<sub>a-d</sub></b>                                   |    | 73 |
| Figure S125: (E)-2-((pyridin-4-ylmethylene)amino)phenol E <sub>a</sub>           |    | 73 |
| Figure S126: 2-(pyridin-4-yl)benzo[ <i>d</i> ]thiazole E <sub>b</sub>            |    | 73 |
| Figure S127: (E)-N-(2-fluorophenyl)-1-(pyridin-4-yl)methanimine E <sub>c</sub>   |    | 74 |
| Figure S128: (E)-1-(pyridin-4-yl)-N-( <i>p</i> -tolyl)methanimine E <sub>d</sub> |    | 74 |
| <b>MASS SPECTRA OF COMPLEXES 1-12</b>                                            |    | 75 |
| Figure S129: [Ag(E <sub>a</sub> ) <sub>2</sub> ]NO <sub>3</sub>                  | 1  | 75 |
| Figure S130: [Ag(E <sub>b</sub> ) <sub>2</sub> ]NO <sub>3</sub>                  | 2  | 76 |
| Figure S132: [Ag(E <sub>d</sub> ) <sub>2</sub> ]NO <sub>3</sub>                  | 4  | 77 |
| Figure S133: [Ag(E <sub>a</sub> ) <sub>2</sub> ]ClO <sub>4</sub>                 | 5  | 77 |
| Figure S134: [Ag(E <sub>b</sub> ) <sub>2</sub> ]ClO <sub>4</sub>                 | 6  | 78 |
| Figure S135: [Ag(E <sub>c</sub> ) <sub>2</sub> ]ClO <sub>4</sub>                 | 7  | 79 |
| Figure S136: [Ag(E <sub>d</sub> ) <sub>2</sub> ]ClO <sub>4</sub>                 | 8  | 79 |
| Figure S137: [Ag(E <sub>a</sub> ) <sub>2</sub> ]CF <sub>3</sub> SO <sub>3</sub>  | 9  | 80 |
| Figure S138: [Ag(E <sub>b</sub> ) <sub>2</sub> ]CF <sub>3</sub> SO <sub>3</sub>  | 10 | 80 |
| Figure S139: [Ag(E <sub>c</sub> ) <sub>2</sub> ]CF <sub>3</sub> SO <sub>3</sub>  | 11 | 81 |
| Figure S140: [Ag(E <sub>d</sub> ) <sub>2</sub> ]CF <sub>3</sub> SO <sub>3</sub>  | 12 | 81 |

**Table S1:** <sup>1</sup>H-NMR chemical shifts of some protons in E<sub>a-d</sub> complexes 1–12 and the IR band of (C=N) and pyridinyl N for E<sub>a-d</sub> complexes 1–12

| Ligands (Complex)   | δC(H=N)ppm  | Δδ   | Hb-py       | Δδ   | ν(C=N) cm <sup>-1</sup> | Δν | ν(py—N) cm <sup>-1</sup> | Δν |
|---------------------|-------------|------|-------------|------|-------------------------|----|--------------------------|----|
| 1 (E <sub>a</sub> ) | 8.78 (9.20) | 0.42 | 8.74 (8.78) | 0.04 | 1627 (1627)             | 0  | 1584 (1580)              | 4  |
| 2 (E <sub>b</sub> ) | -           | -    | 8.81 (8.78) | 0.03 | -                       | -  | 1606 (1586)              | 20 |
| 3 (E <sub>c</sub> ) | 8.76 (8.74) | 0.02 | 8.78 (8.78) | 0.00 | 1610 (1612)             | 2  | 1552 (1585)              | 33 |
| 4 (E <sub>d</sub> ) | 8.74 (8.68) | 0.06 | 8.75 (8.74) | 0.01 | 1608 (-)                | -  | 1586 (1589)              | 3  |
| 5 (E <sub>a</sub> ) | 8.78 (9.20) | 0.42 | 8.74 (8.78) | 0.04 | 1624 (1627)             | 3  | 1585 (1580)              | 5  |
| 6 (E <sub>b</sub> ) | -           | -    | 8.79 (8.78) | 0.01 |                         | -  | 1611 (1586)              | 25 |
| 7 (E <sub>c</sub> ) | 8.76 (8.74) | 0.02 | 8.79 (8.78) | 0.01 | 1613 (1612)             | 1  | 1557 (1585)              | 28 |
| 8 (E <sub>d</sub> ) | 8.74 (8.68) | 0.06 | 8.76 (8.74) | 0.02 | 1610 (-)                | -  | - (1589)                 | -  |

|         |             |      |             |      |             |   |             |    |
|---------|-------------|------|-------------|------|-------------|---|-------------|----|
| 9 (Ea)  | 8.79 (9.20) | 0.41 | 8.74 (8.78) | 0.04 | 1625 (1627) | 2 | 1585 (1580) | 5  |
| 10 (Eb) | -           | -    | 8.79 (8.78) | 0.01 |             | - | 1609 (1586) | 23 |
| 11 (Ec) | 8.76 (8.74) | 0.02 | 8.78 (8.78) | 0.00 | 1609 (1612) | 3 | 1552 (1585) | 33 |
| 12 (Ed) | 8.74 (8.68) | 0.06 | 8.76 (8.74) | 0.02 | 1609 (-)    | - | -(1589)     | -  |

**Table S2:**  $^{15}\text{N}$  NMR chemical shifts of  $\text{E}_{a-d}$  and selected complexes (**2**, **7**, **8** and **9**)

| Ligand (Complex) | $\delta^{15}\text{N}_{\text{py}}$ (ppm) | $\Delta\delta^{15}\text{N}_{\text{py}}$ (ppm) | $\delta^{15}\text{N}=\text{C}$ (ppm) | $\Delta\delta^{15}\text{N}_{\text{im}}$ (ppm) |
|------------------|-----------------------------------------|-----------------------------------------------|--------------------------------------|-----------------------------------------------|
| <b>2 (Eb)</b>    | 323 (314)                               | 9                                             | -                                    | -                                             |
| <b>7 (Ec)</b>    | 303 (327)                               | 24                                            | 326 (327)                            | 1                                             |
| <b>8 (Ed)</b>    | 324 (317)                               | 7                                             | 339 (339)                            | 0                                             |
| <b>9 (Ea)</b>    | 329 (333)                               | 4                                             | -                                    | -                                             |

**Table S3:** Physical and chemical data of Silver(I) complexes **1–12**

| Comp.     | Anal. Calcd. (Anal. found) |             |               | M.pt.<br>(°C) | MS     |       | MC<br>( $\Lambda_{\text{m}}/\text{S m}^2 \text{mol}^{-1}$ )<br>$\times 10^4$ |
|-----------|----------------------------|-------------|---------------|---------------|--------|-------|------------------------------------------------------------------------------|
|           | C                          | H           | N             |               | Calcd. | Found |                                                                              |
| <b>1</b>  | 50.90 (50.62)              | 3.56 (3.23) | 12.37 (12.39) | 157-158       | 504.32 | 504   | 22.5                                                                         |
| <b>2</b>  | 48.50 (48.49)              | 2.71 (2.54) | 11.78 (11.58) | 186-187       | 532.41 | 532   | 19.8                                                                         |
| <b>3</b>  | 50.55 (50.49)              | 3.18 (3.13) | 12.28 (12.06) | 146-147       | 508.30 | 508   | 13.4                                                                         |
| <b>4</b>  | 55.53 (55.80)              | 4.30 (4.00) | 12.45 (12.24) | 164-165       | 500.37 | 501   | 20.4                                                                         |
| <b>5</b>  | 47.74 (47.52)              | 3.34 (3.11) | 9.28 (9.09)   | 169-170       | 504.32 | 504   | 26.3                                                                         |
| <b>6</b>  | 45.62 (45.38)              | 2.55 (2.55) | 8.87 (8.61)   | 168-169       | 532.41 | 532   | 15.7                                                                         |
| <b>7</b>  | 47.43 (47.40)              | 2.99 (2.74) | 9.22 (9.00)   | 209-210       | 508.30 | 508   | 24.4                                                                         |
| <b>8</b>  | 52.06 (52.05)              | 4.03 (3.89) | 9.34 (9.27)   | 227-228       | 500.37 | 501   | 19.2                                                                         |
| <b>9</b>  | 45.96 (45.82)              | 3.09 (2.85) | 8.58 (8.52)   | 165-166       | 504.32 | 504   | 29.0                                                                         |
| <b>10</b> | 44.06 (43.93)              | 2.37 (2.27) | 8.22 (8.04)   | 183-184       | 532.41 | 532   | 23.3                                                                         |
| <b>11</b> | 45.68 (45.68)              | 2.76 (2.74) | 8.52 (8.38)   | 171-172       | 508.30 | 508   | 27.8                                                                         |
| <b>12</b> | 49.94 (49.73)              | 3.73 (3.41) | 8.63 (8.60)   | 220-221       | 500.37 | 501   | 20.8                                                                         |

### DNA Binding Studies



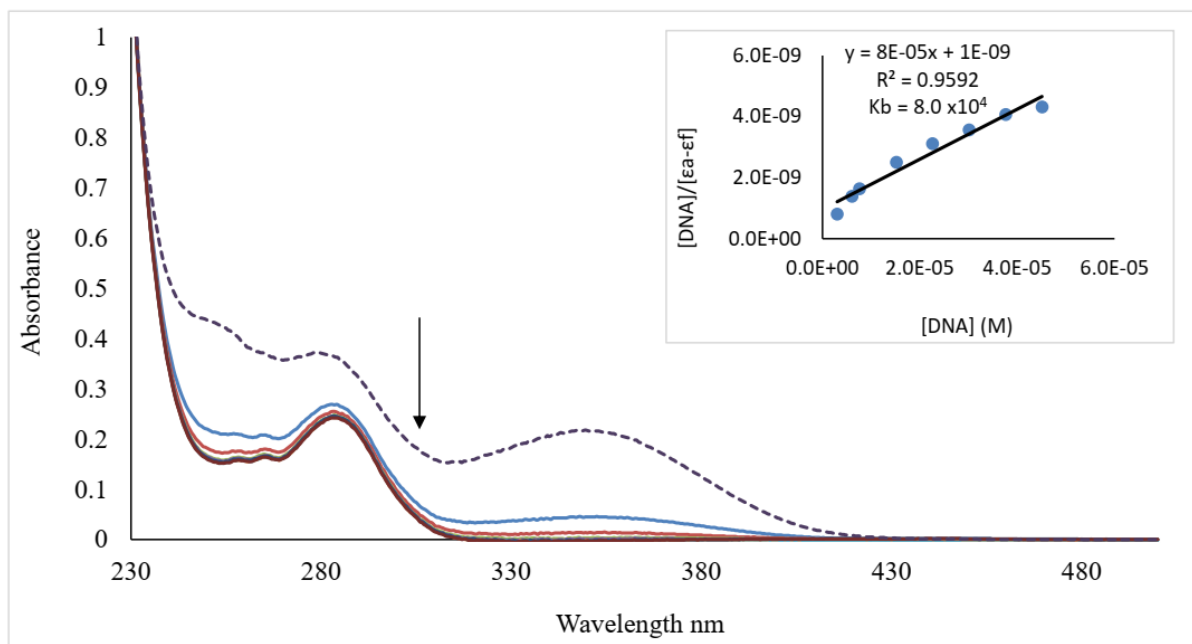

**Figure S1:** Electronic Absorption Spectra of Ligand  $E_a$  at  $2.0 \times 10^{-5}$  M in the absence (dashed line) and the presence of different concentrations of CT-DNA ( $0 - 3.0 \times 10^{-5}$  M) at  $285$  nm  $\lambda_{\max}$ . (inset) A stern-volmer plot of  $E_a$  interaction with CT-DNA

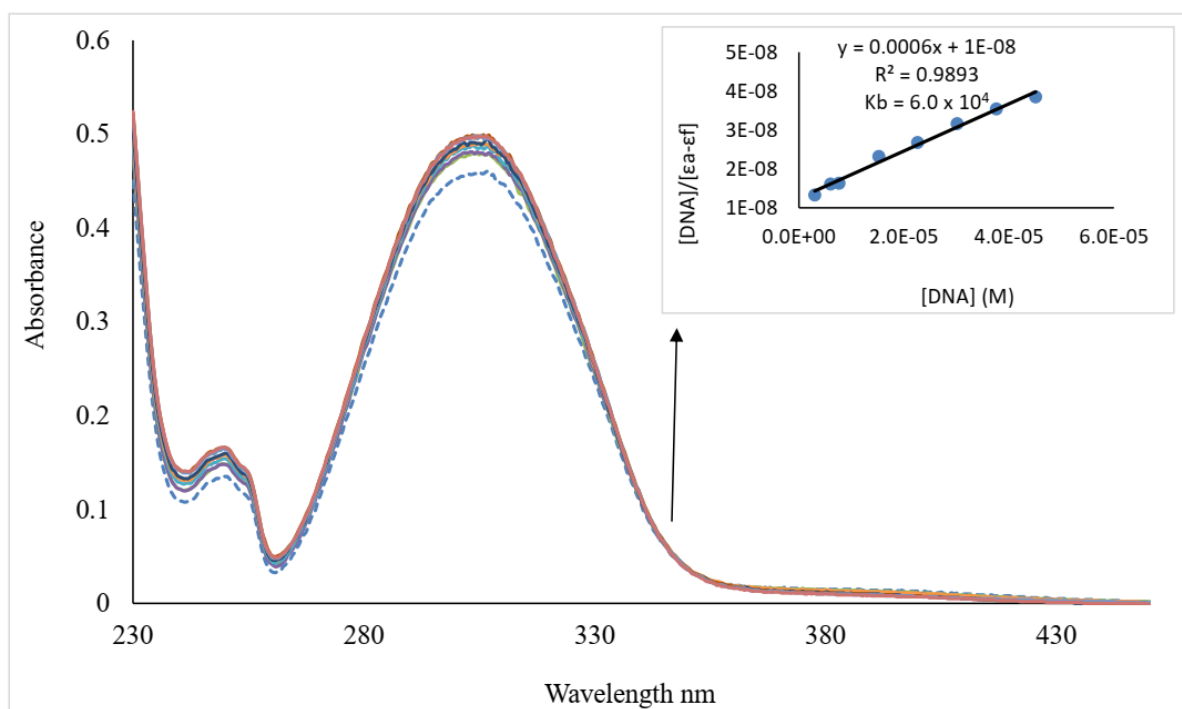

**Figure S2:** Electronic Absorption Spectra of Ligand  $E_b$  at  $2.0 \times 10^{-5}$  M in the absence (dashed line) and the presence of different concentrations of CT-DNA ( $0 - 3.0 \times 10^{-5}$  M) at  $302$  nm  $\lambda_{\max}$ . (inset) A stern-volmer plot of  $E_b$  interaction with CT-DNA

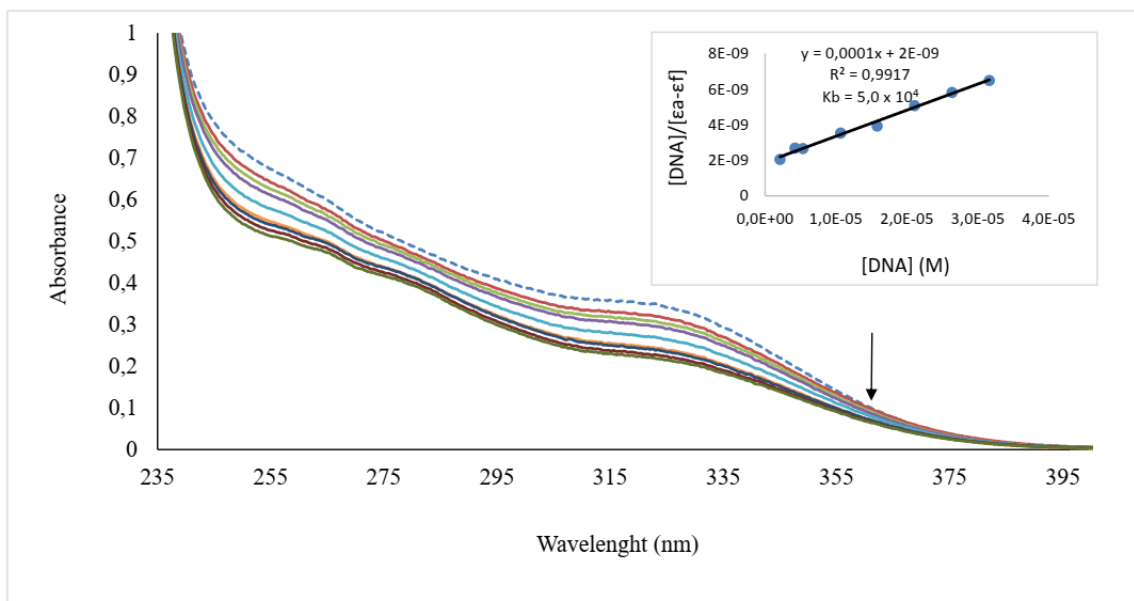

**Figure S3:** Electronic Absorption Spectra of Ligand  $E_c$  at  $2.0 \times 10^{-5} \text{ M}$  in the absence (dashed line) and the presence of different concentrations of CT-DNA ( $0 - 3.0 \times 10^{-5} \text{ M}$ ) at  $327 \text{ nm}$   $\lambda_{\text{max}}$ . (inset) A stern-volmer plot of  $E_c$  interaction with CT-DNA

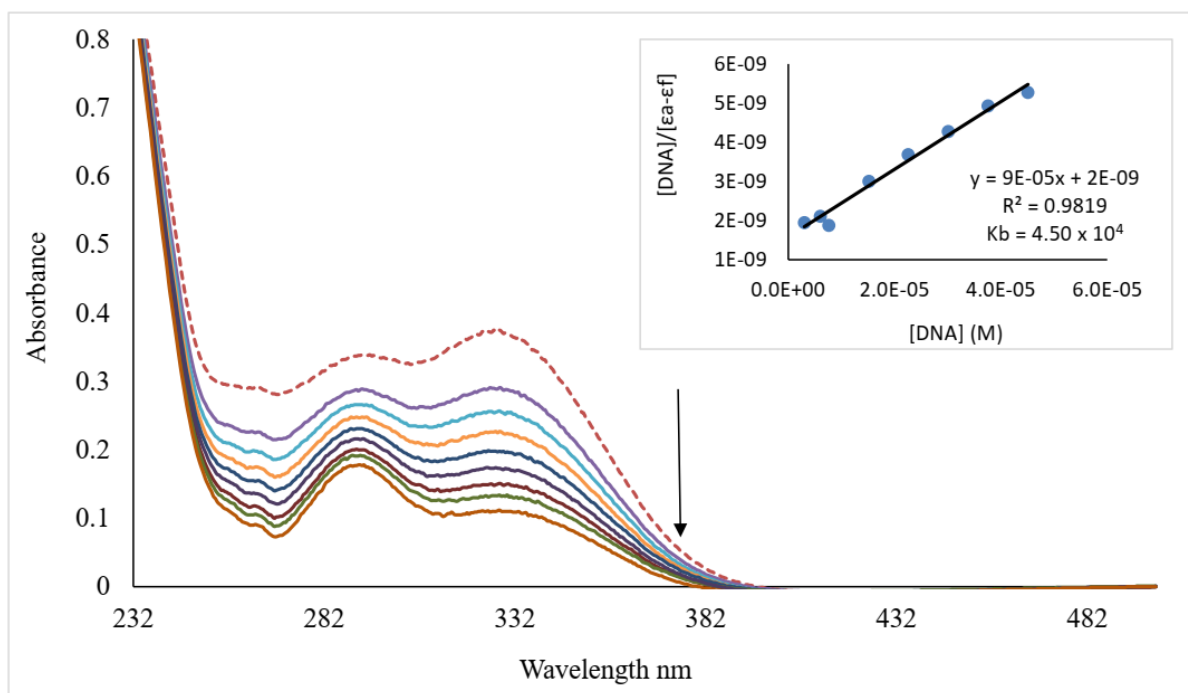

**Figure S4:** Electronic Absorption Spectra of Ligand  $E_d$  at  $2.0 \times 10^{-5} \text{ M}$  in the absence (dashed line) and the presence of different concentrations of CT-DNA ( $0 - 3.0 \times 10^{-5} \text{ M}$ ) at  $333 \text{ nm}$   $\lambda_{\text{max}}$ . (inset) A stern-volmer plot of  $E_d$  interaction with CT-DNA

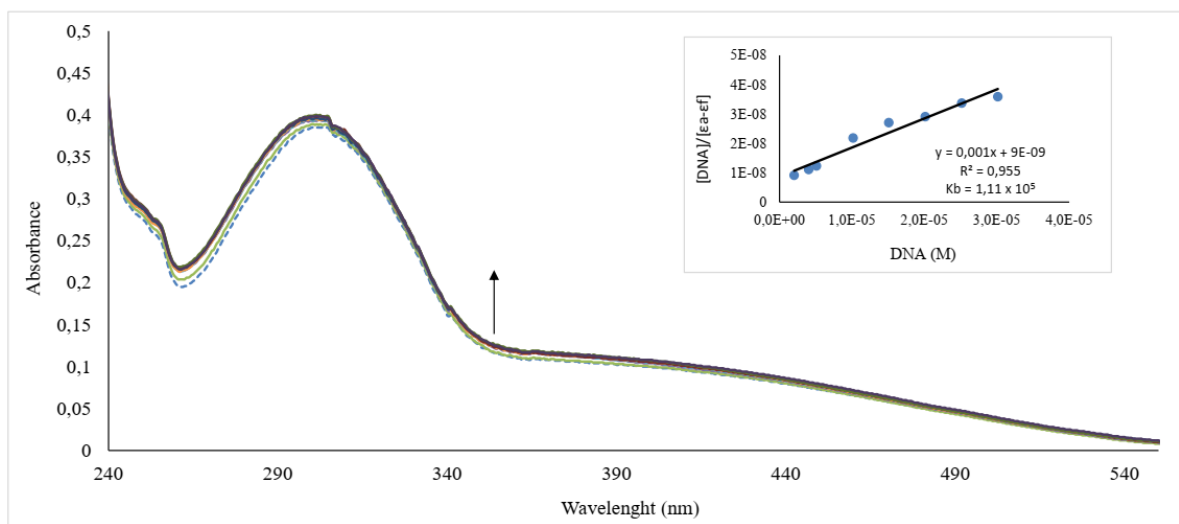

**Figure S5:** Electronic Absorption Spectra of complex **2** at  $2.0 \times 10^{-5}$  M in the absence (dashed line) and the presence of different concentrations of CT-DNA ( $0 - 3.0 \times 10^{-5}$  M) at  $306 \text{ nm } \lambda_{\text{max}}$ . (inset) A stern-volmer plot of **2** interaction with CT-DNA

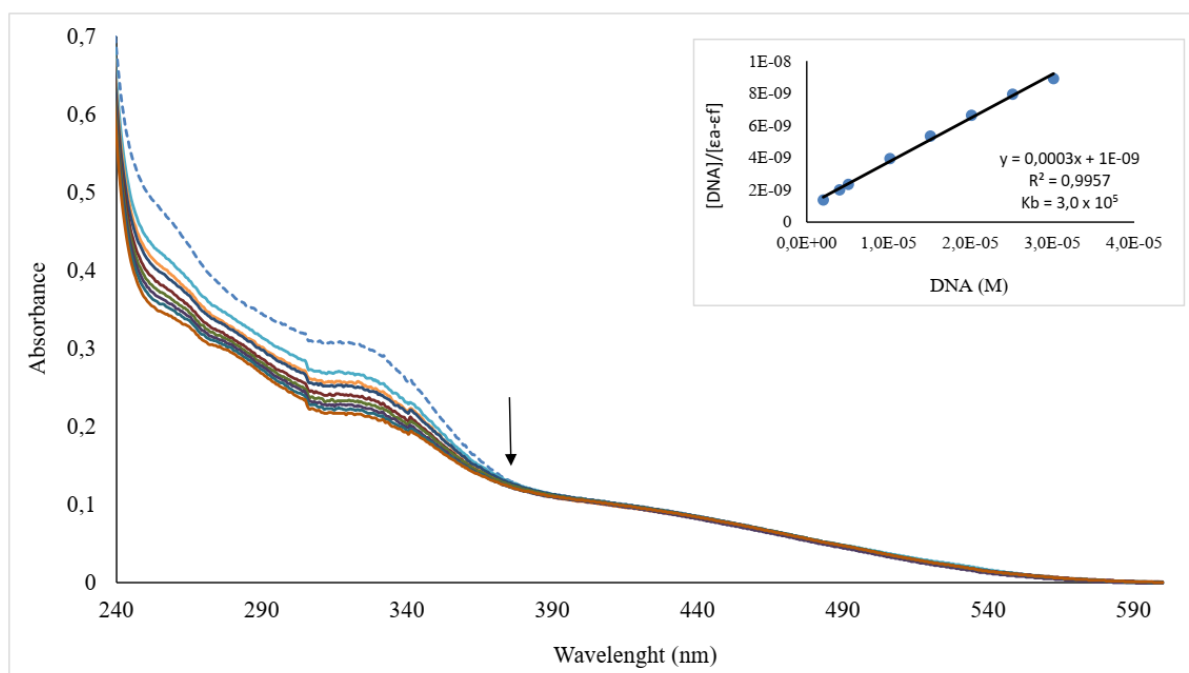

**Figure S6:** Electronic Absorption Spectra of complex **3** at  $2.0 \times 10^{-5}$  M in the absence (dashed line) and the presence of different concentrations of CT-DNA ( $0 - 3.0 \times 10^{-5}$  M) at  $330 \text{ nm } \lambda_{\text{max}}$ . (inset) A stern-volmer plot of **3** interaction with CT-DNA

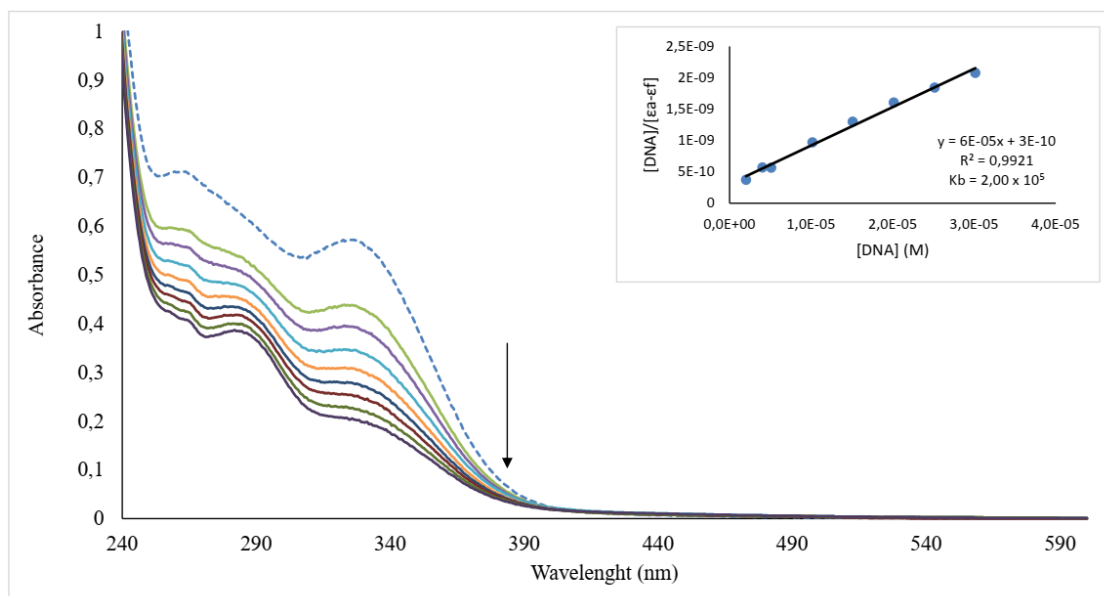

**Figure S7:** Electronic Absorption Spectra of complex **4** at  $2.0 \times 10^{-5} \text{ M}$  in the absence (dashed line) and the presence of different concentrations of CT-DNA ( $0 - 3.0 \times 10^{-5} \text{ M}$ ) at  $332 \text{ nm } \lambda_{\text{max}}$ . (inset) A stern-volmer plot of **4** interaction with CT-DNA

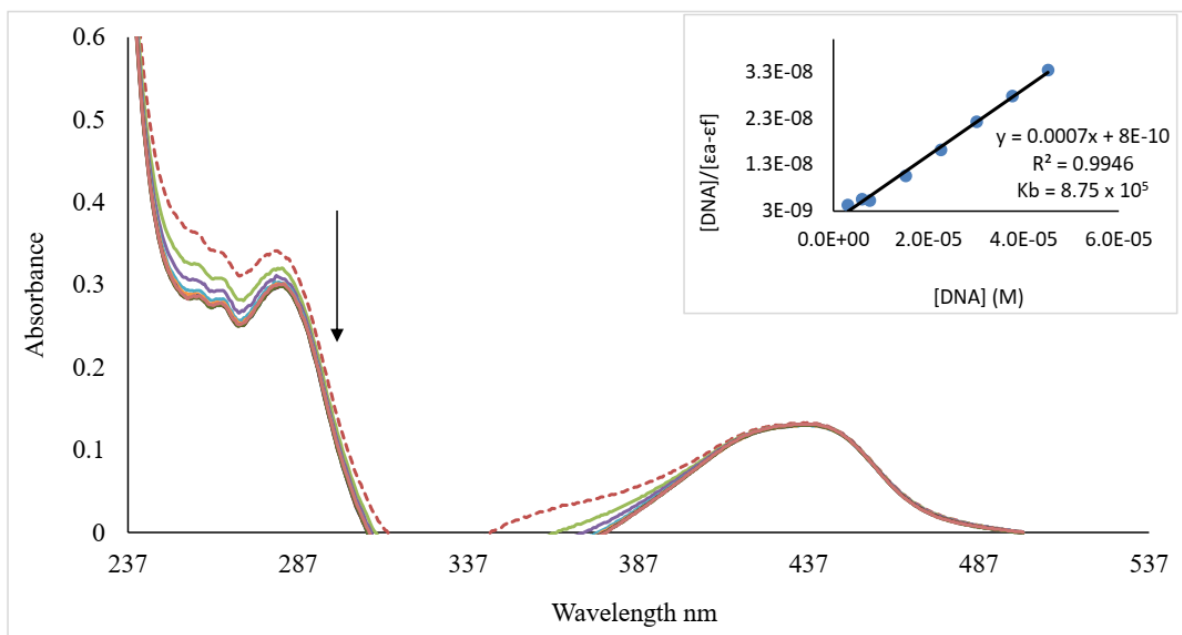

**Figure S8:** Electronic Absorption Spectra of complex **5** at  $2.0 \times 10^{-5}$  M in the absence (dashed line) and the presence of different concentrations of CT-DNA ( $0 - 3.0 \times 10^{-5}$  M) at  $285$  nm  $\lambda_{\max}$ . (inset) A stern-volmer plot of **5** interaction with CT-DNA

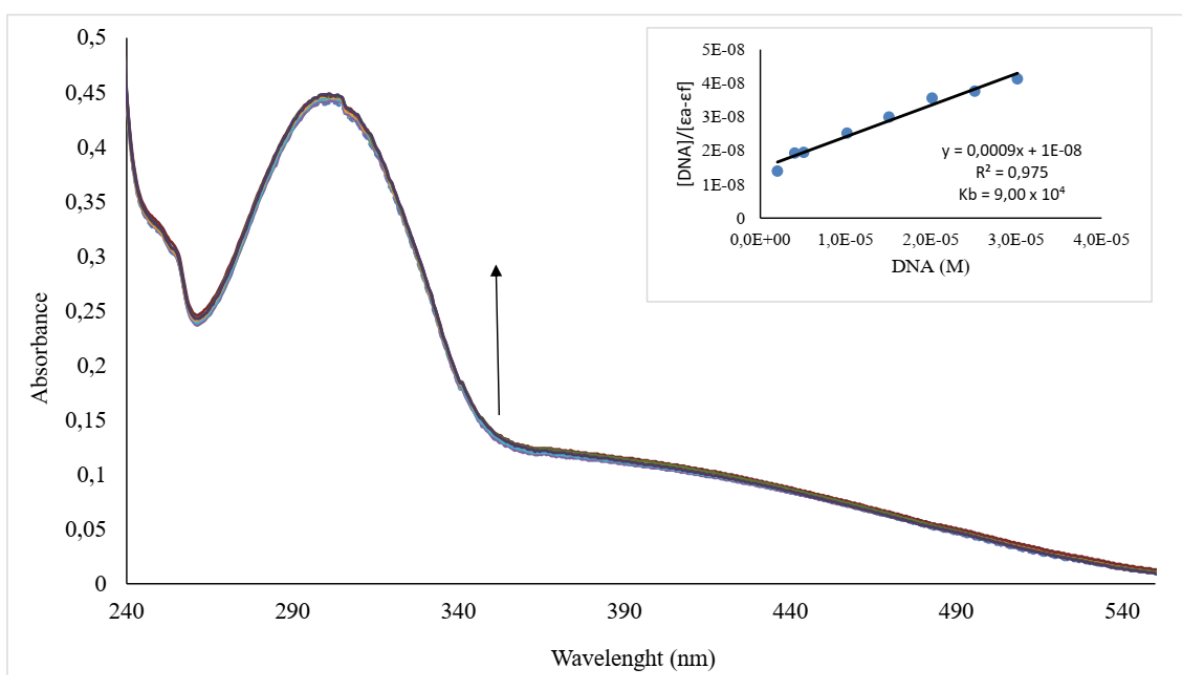

**Figure S9:** Electronic Absorption Spectra of complex **6** at  $2.0 \times 10^{-5}$  M in the absence (dashed line) and the presence of different concentrations of CT-DNA ( $0 - 3.0 \times 10^{-5}$  M) at  $306$  nm  $\lambda_{\max}$ . (inset) A stern-volmer plot of **6** interaction with CT-DNA

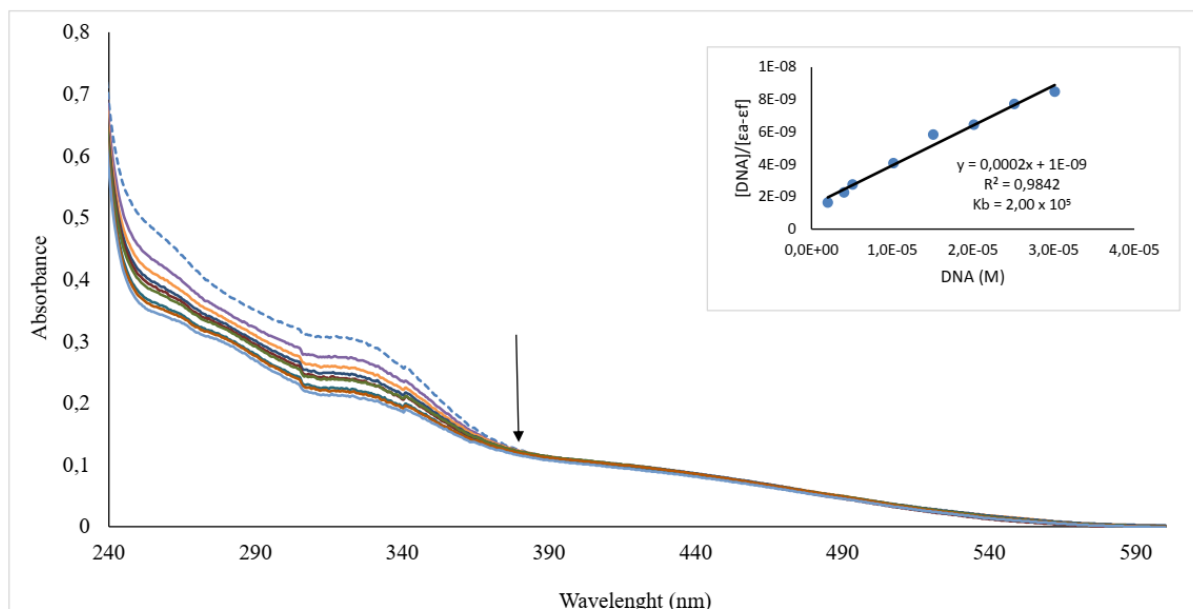

**Figure S10:** Electronic Absorption Spectra of complex **7** at  $2.0 \times 10^{-5}$  M in the absence (dashed line) and the presence of different concentrations of CT-DNA ( $0 - 3.0 \times 10^5$  M) at  $328$  nm  $\lambda_{\max}$ . (inset) A stern-volmer plot of **7** interaction with CT-DNA

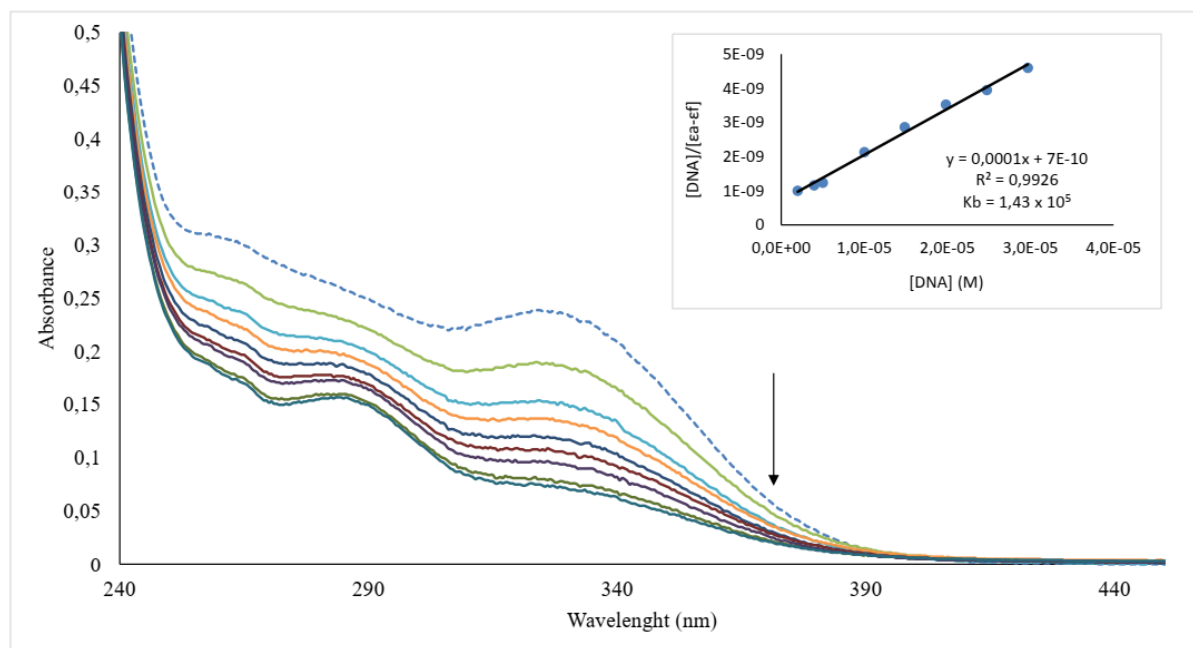

**Figure S11:** Electronic Absorption Spectra of complex **8** at  $2.0 \times 10^{-5}$  M in the absence (dashed line) and the presence of different concentrations of CT-DNA ( $0 - 3.0 \times 10^5$  M) at  $332$  nm  $\lambda_{\max}$ . (inset) A stern-volmer plot of **8** interaction with CT-DNA

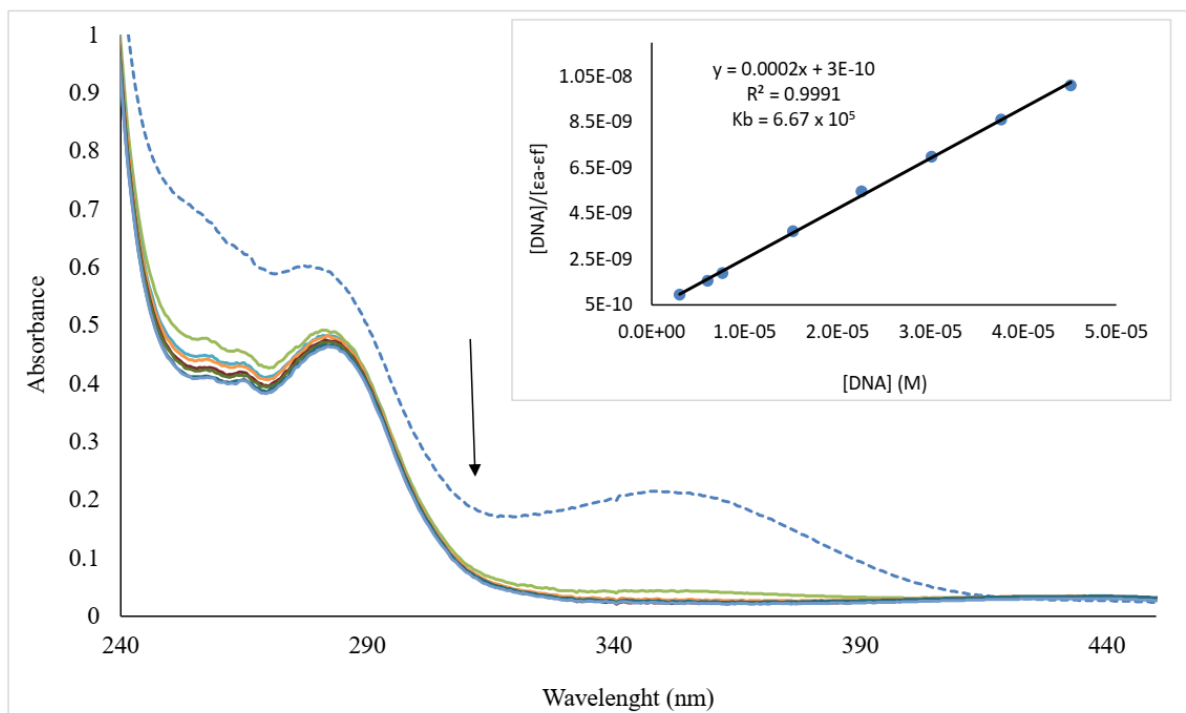

**Figure S12:** Electronic Absorption Spectra of complex **9** at  $2.0 \times 10^{-5}$  M in the absence (dashed line) and the presence of different concentrations of CT-DNA ( $0 - 3.0 \times 10^5$  M) at  $282 \text{ nm } \lambda_{\text{max}}$ . (inset) A stern-volmer plot of **9** interaction with CT-DNA

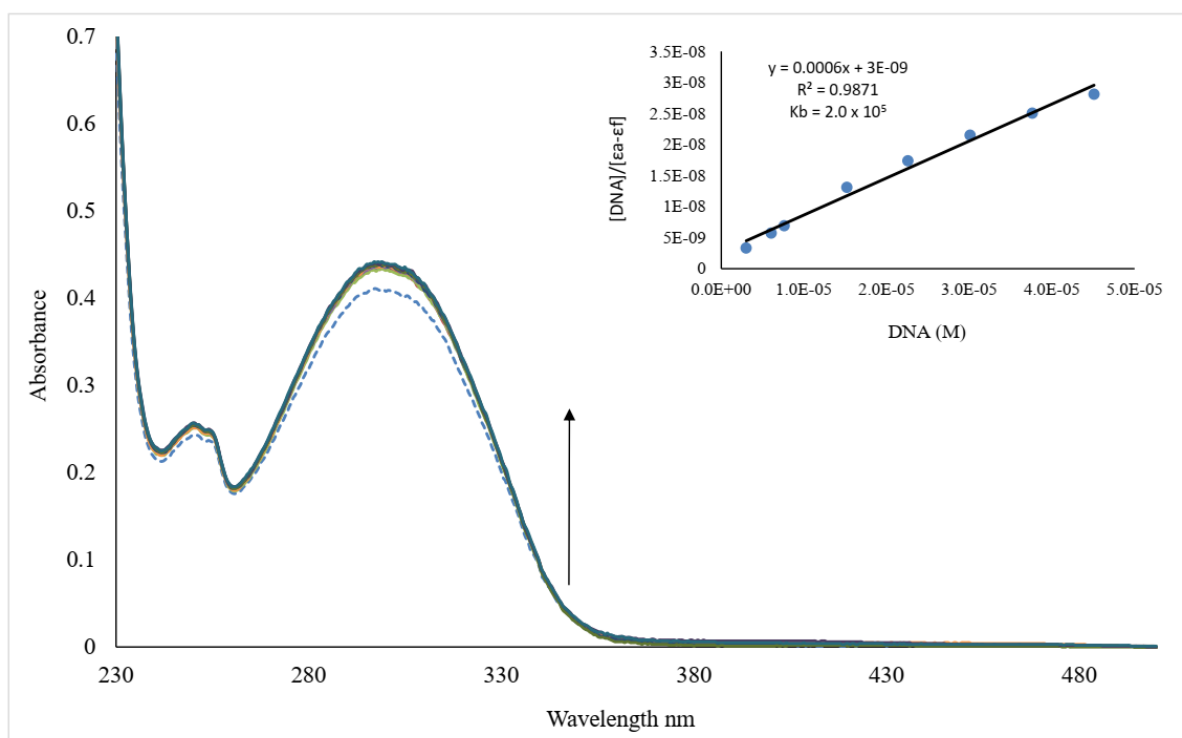

**Figure S13:** Electronic Absorption Spectra of complex **10** at  $2.0 \times 10^{-5}$  M in the absence (dashed line) and the presence of different concentrations of CT-DNA ( $0 - 3.0 \times 10^5$  M) at  $300 \text{ nm } \lambda_{\text{max}}$ . (inset) A stern-volmer plot of **10** interaction with CT-DNA

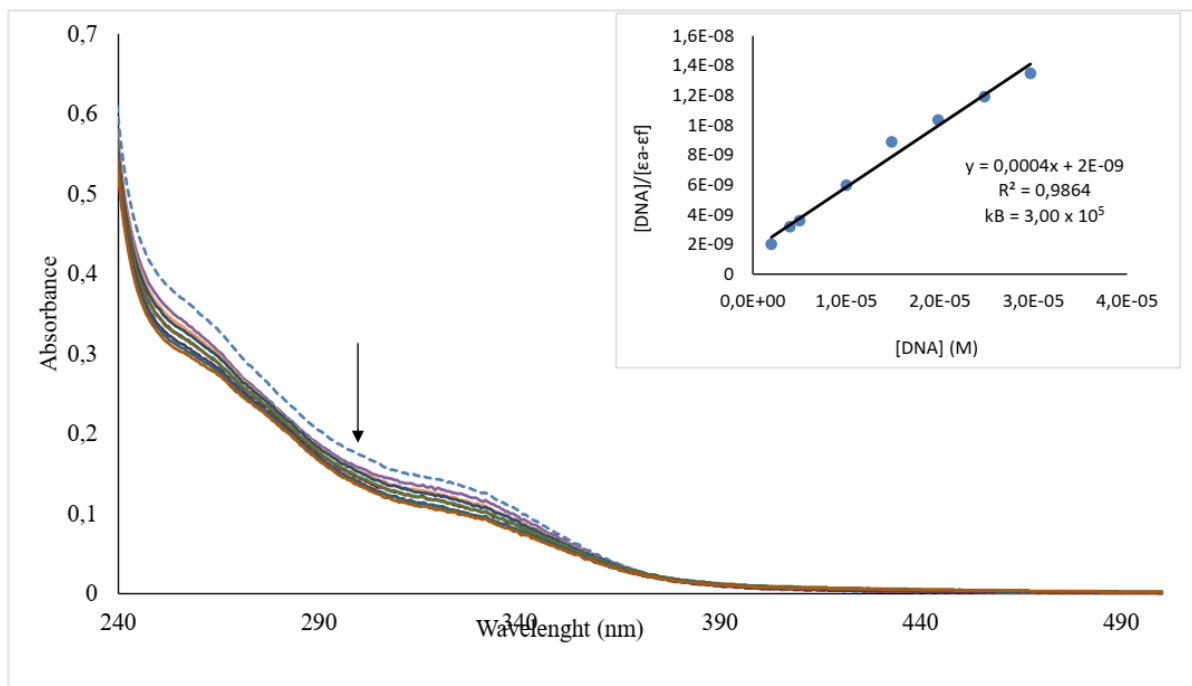

**Figure S14:** Electronic Absorption Spectra of complex **11** at  $2.0 \times 10^{-5}$  M in the absence (dashed line) and the presence of different concentrations of CT-DNA ( $0 - 3.0 \times 10^{-5}$  M) at 331 nm  $\lambda_{\text{max}}$ . (inset) A stern-volmer plot of **11** interaction with CT-DNA

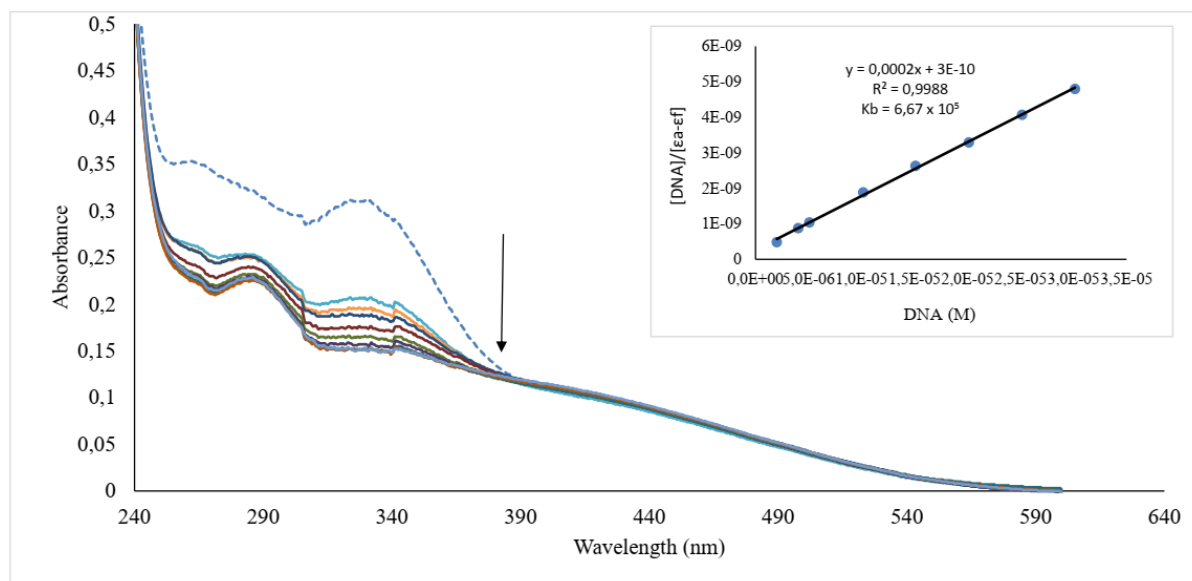

**Figure S15:** Electronic Absorption Spectra of complex **12** at  $2.0 \times 10^{-5}$  M in the absence (dashed line) and the presence of different concentrations of CT-DNA ( $0 - 3.0 \times 10^{-5}$  M) at 340 nm  $\lambda_{\text{max}}$ . (inset) A stern-volmer plot of **12** interaction with CT-DNA



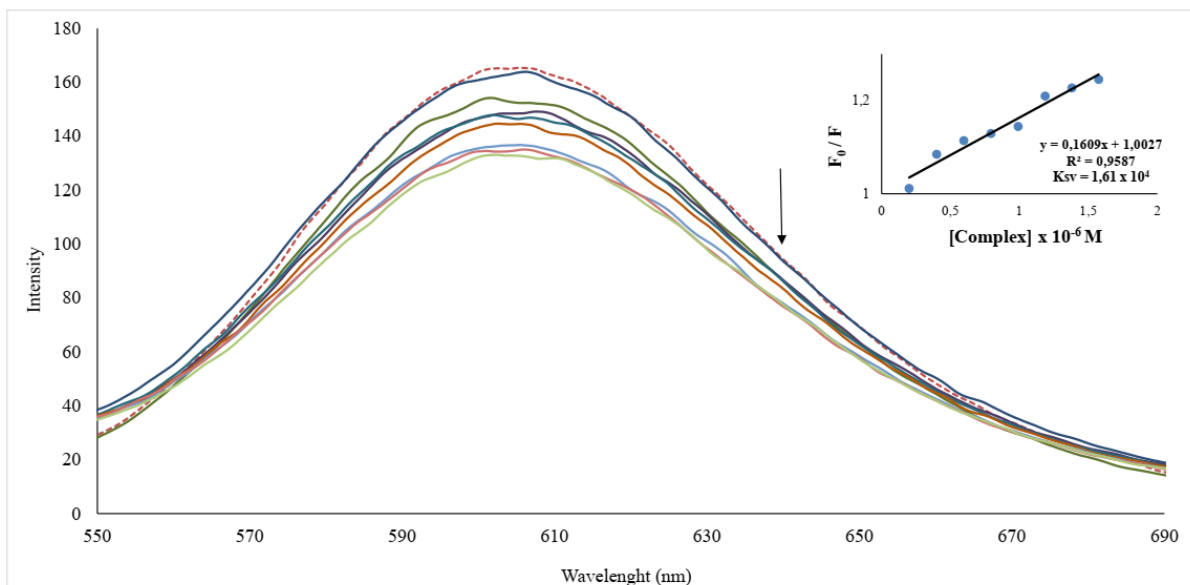

**Figure S16:** The Fluorescence spectra of EB-CT-DNA in the absence (dashed line) and the presence of different concentration of complex **3**. (inset) Stern-Volmer plot of **3** interactions with EB-CT- DNA

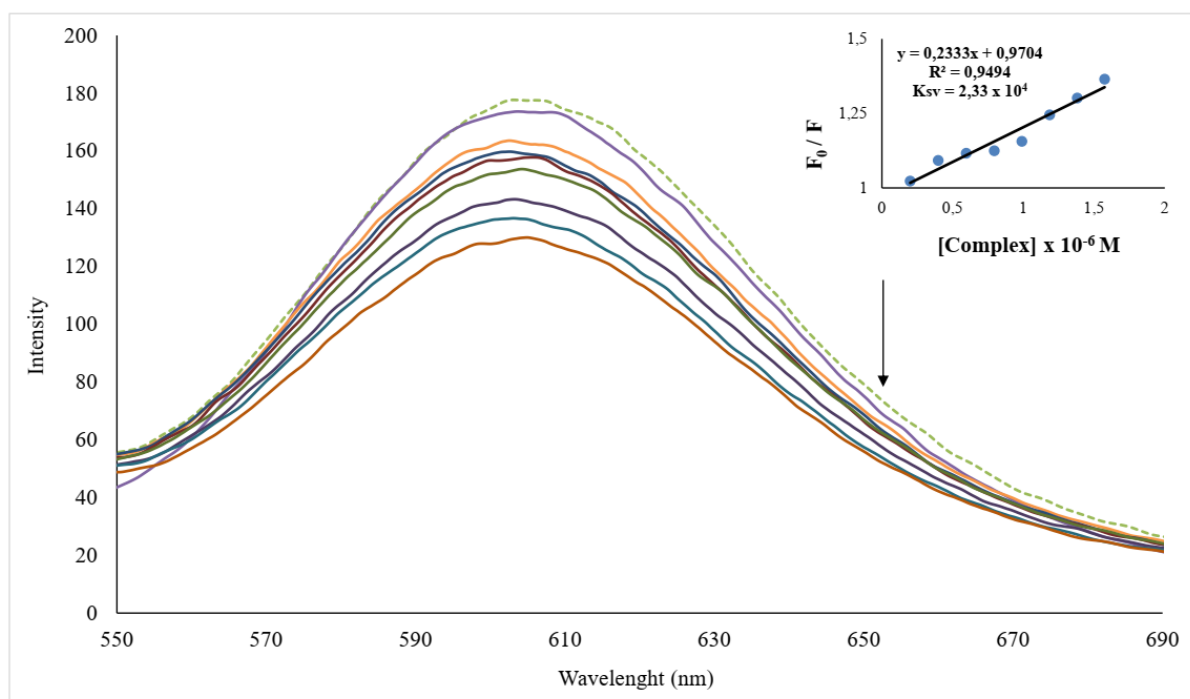

**Figure S17:** The Fluorescence spectra of EB-CT-DNA in the absence (dashed line) and the presence of different concentration of complex **4**. (inset) Stern-Volmer plot of **4** interaction with EB-CT- DNA

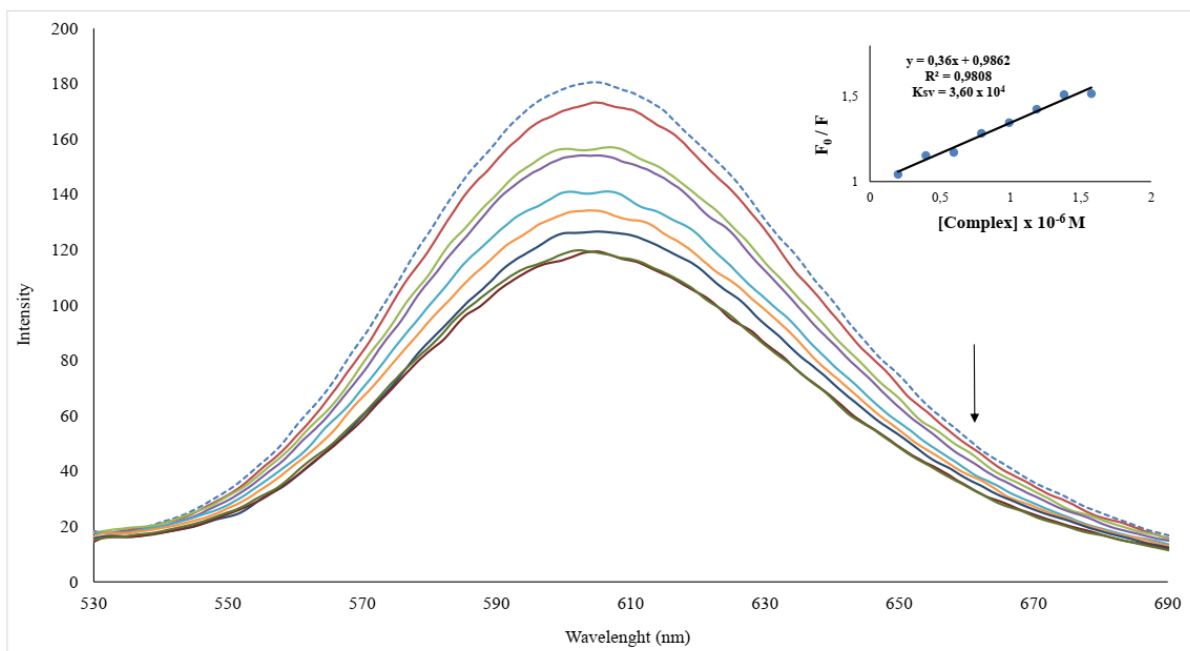

**Figure S18:** The Fluorescence spectra of EB-CT-DNA in the absence (dashed line) and the presence of different concentrations of complex **5**. (inset) Stern-Volmer plot of **5** interaction with EB-CT- DNA

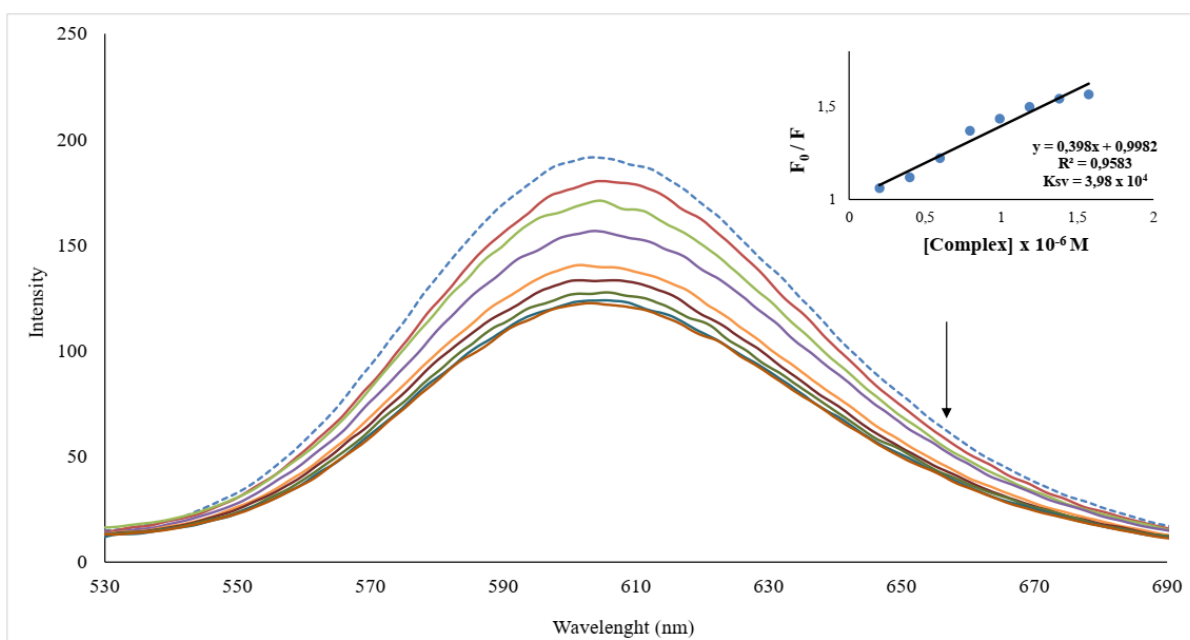

**Figure S19:** The Fluorescence spectra of EB-CT-DNA in the absence (dashed line) and the presence of different concentrations of complex **7**. (inset) Stern-Volmer plot of **7** interaction with EB-CT- DNA

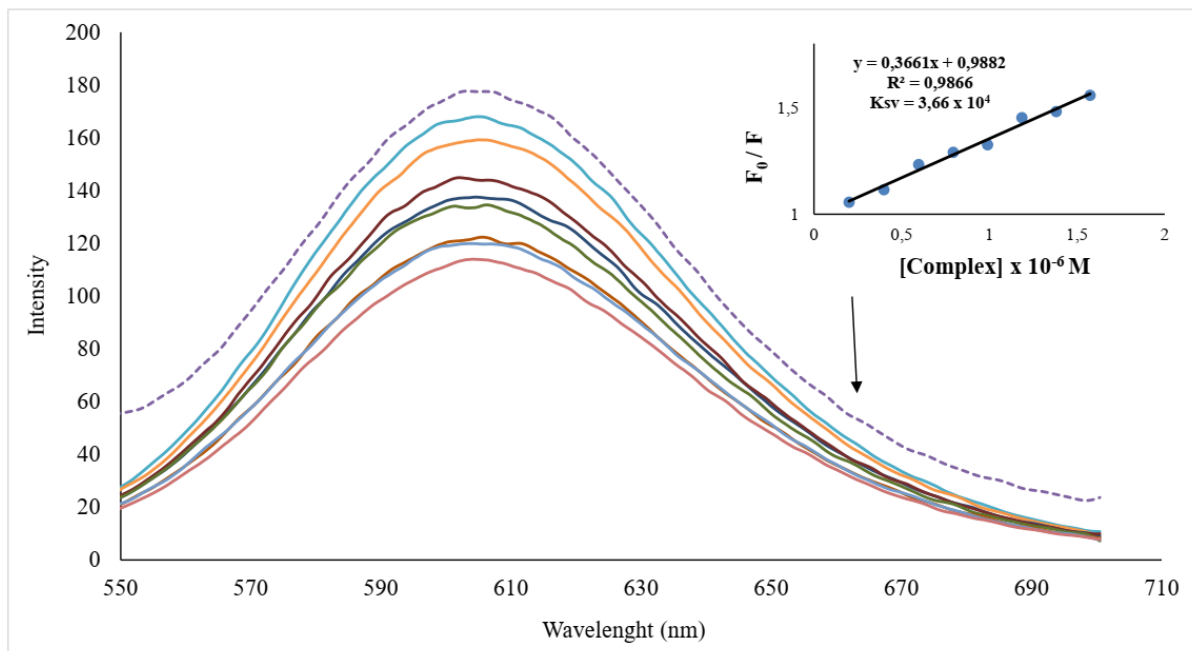

**Figure S20:** The Fluorescence spectra of EB-CT-DNA in the absence (dashed line) and the presence of different concentration of complex **8**. (inset) Stern-Volmer plot of **8** interaction with EB-CT- DNA

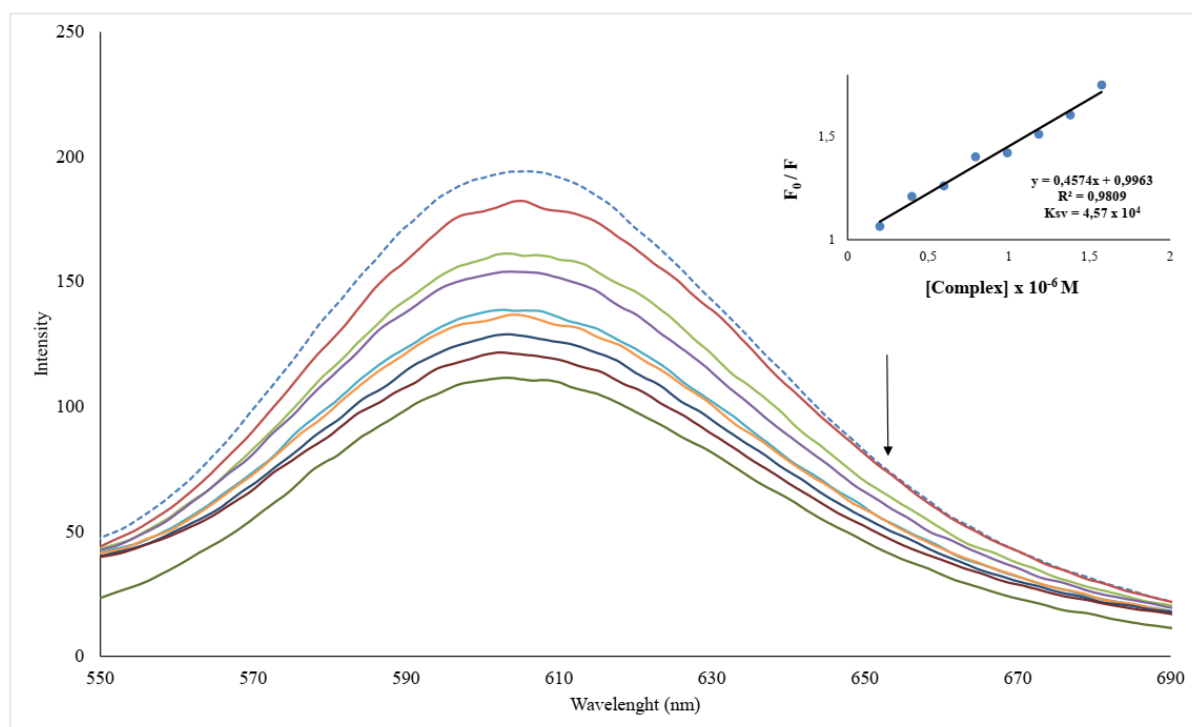

**Figure S21:** The Fluorescence spectra of EB-CT-DNA in the absence (dashed line) and the presence of different concentrations of complex **9**. (inset) Stern-Volmer plot of **9** interaction with EB-CT- DNA

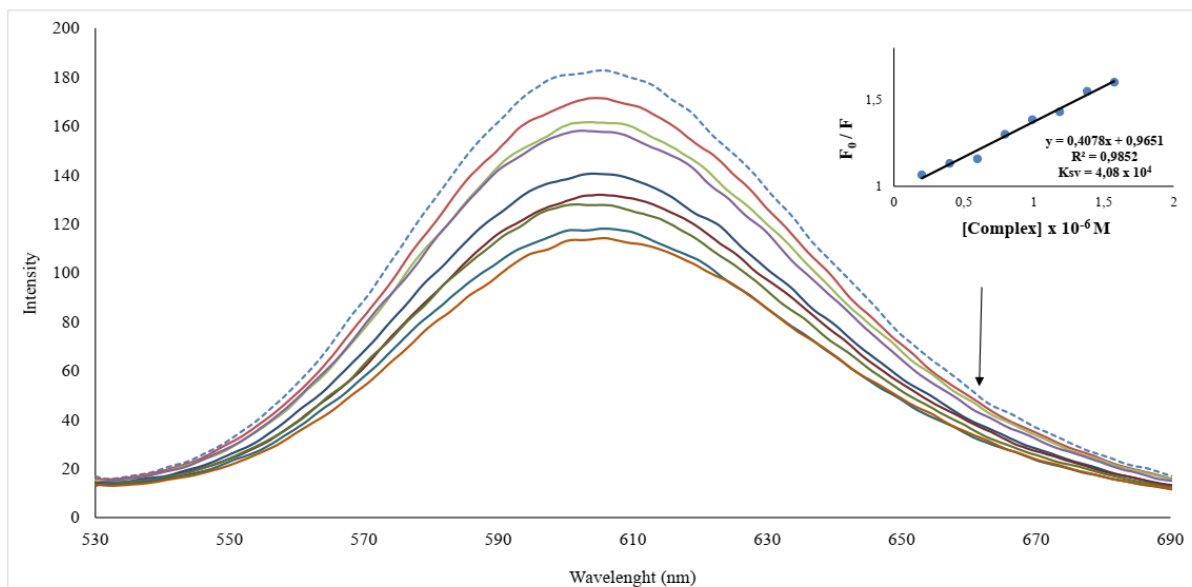

**Figure S22:** The Fluorescence spectra of EB-CT-DNA in the absence (dashed line) and the presence of different concentrations of complex **11**. (inset) Stern-Volmer plot of **11** interaction with EB-CT- DNA

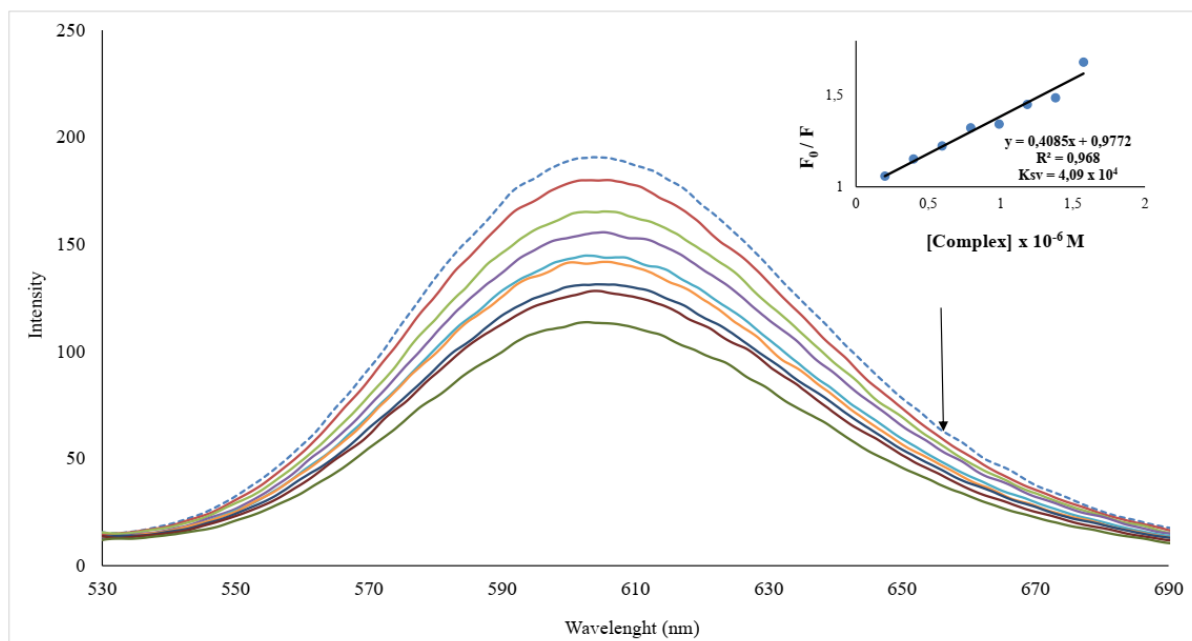

**Figure S23:** The Fluorescence spectra of EB-CT-DNA in the absence (dashed line) and the presence of different concentrations of complex **12**. (inset) Stern-Volmer plot of **12** interaction with EB-CT- DNA

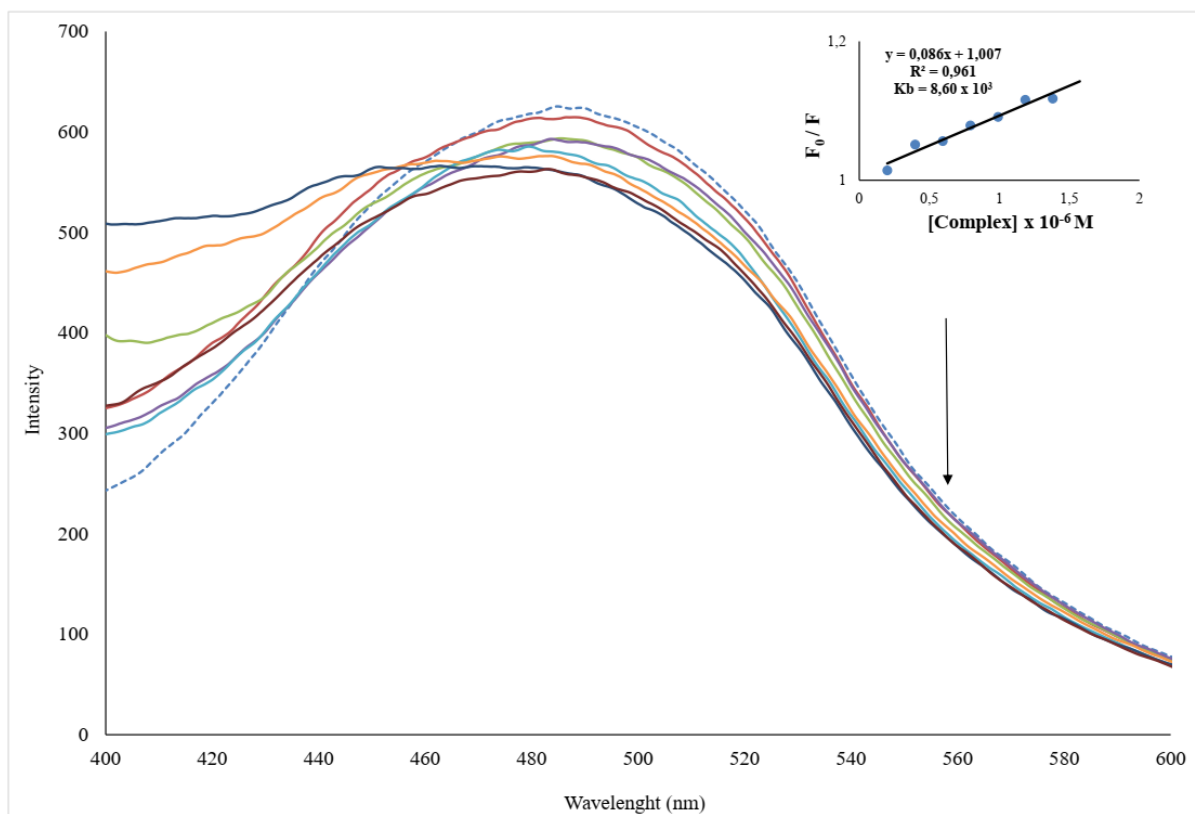

**Figure S24:** The Fluorescence spectra of Hoechst 33342-CT-DNA in the absence (dashed line) and the presence of different concentrations of complex **6**. (inset) Stern-Volmer plot of **6** interaction with Hoechst 33342-CT-DNA

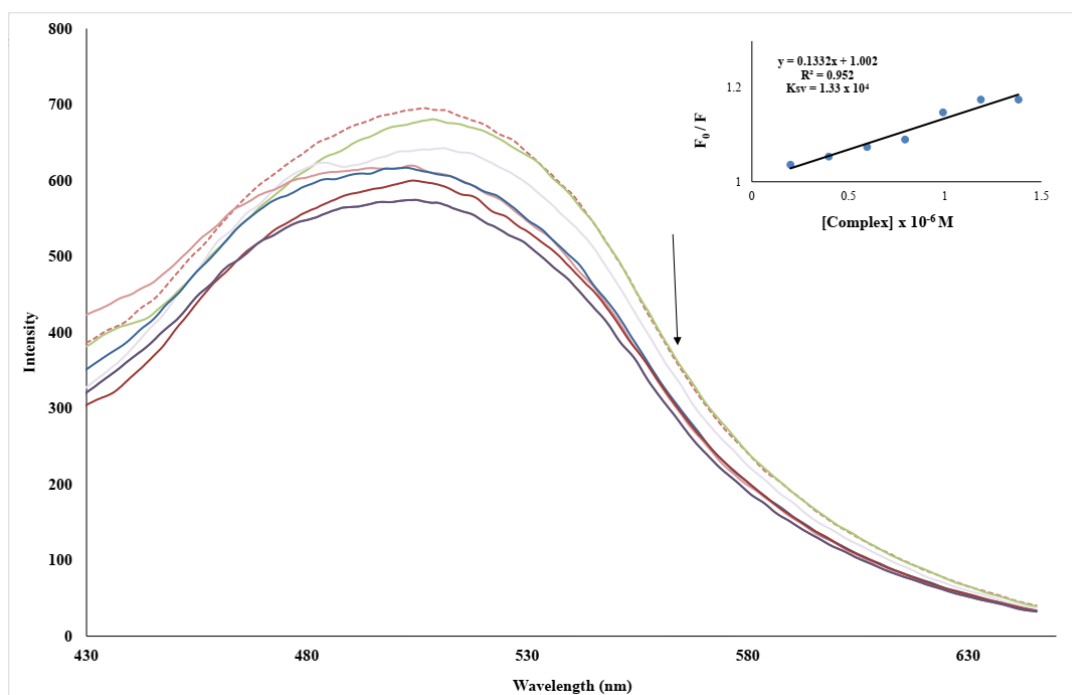

**Figure S25:** The Fluorescence spectra of Hoechst 33342-CT-DNA in the absence (dashed line) and the presence of different concentration of complex **10**. (inset) Stern-Volmer plot of **10** interaction with Hoechst 33342-CT-DNA

The double-logarithmic plot of EB-CT-DNA–Complexes interactions at room temperature.

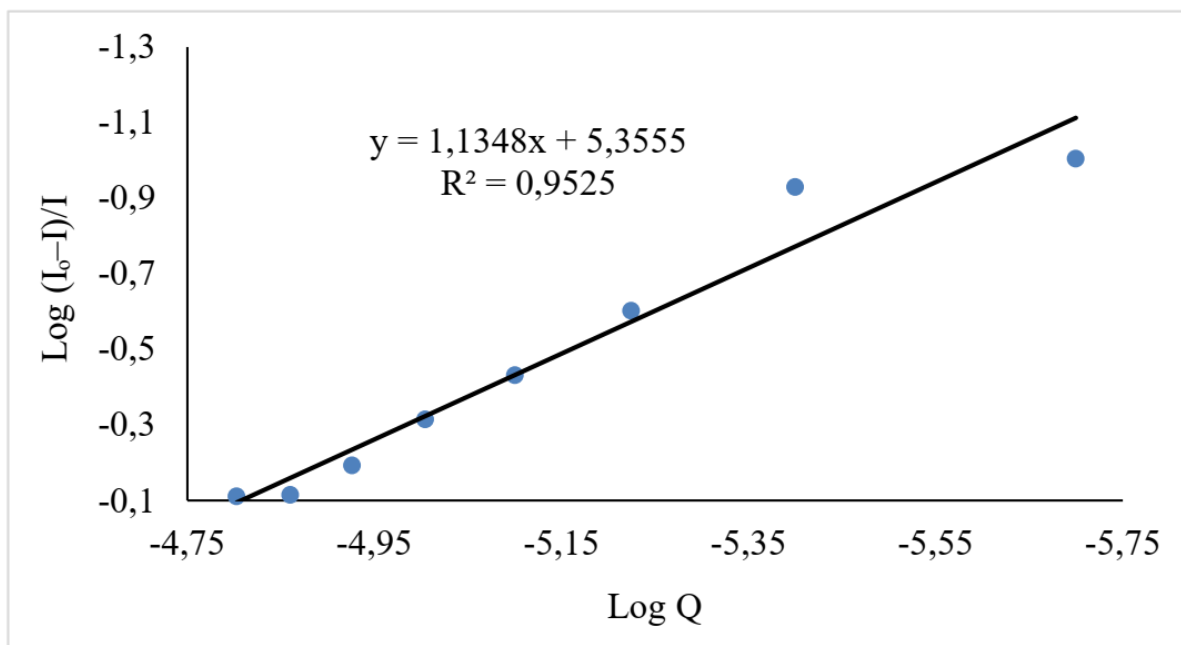

Figure S26: The double-logarithmic plot of EB-CT-DNA–Complex 1 interaction at room temperature.

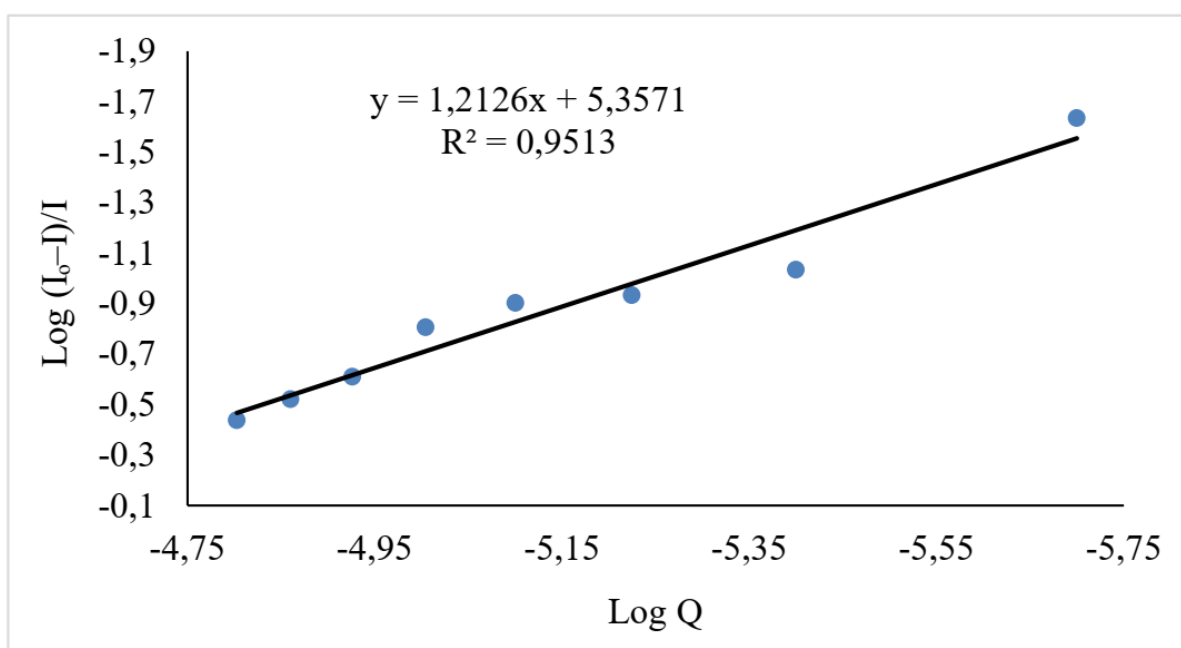

Figure S27: The double-logarithmic plot of EB-CT-DNA–Complex 4 interaction at room temperature.

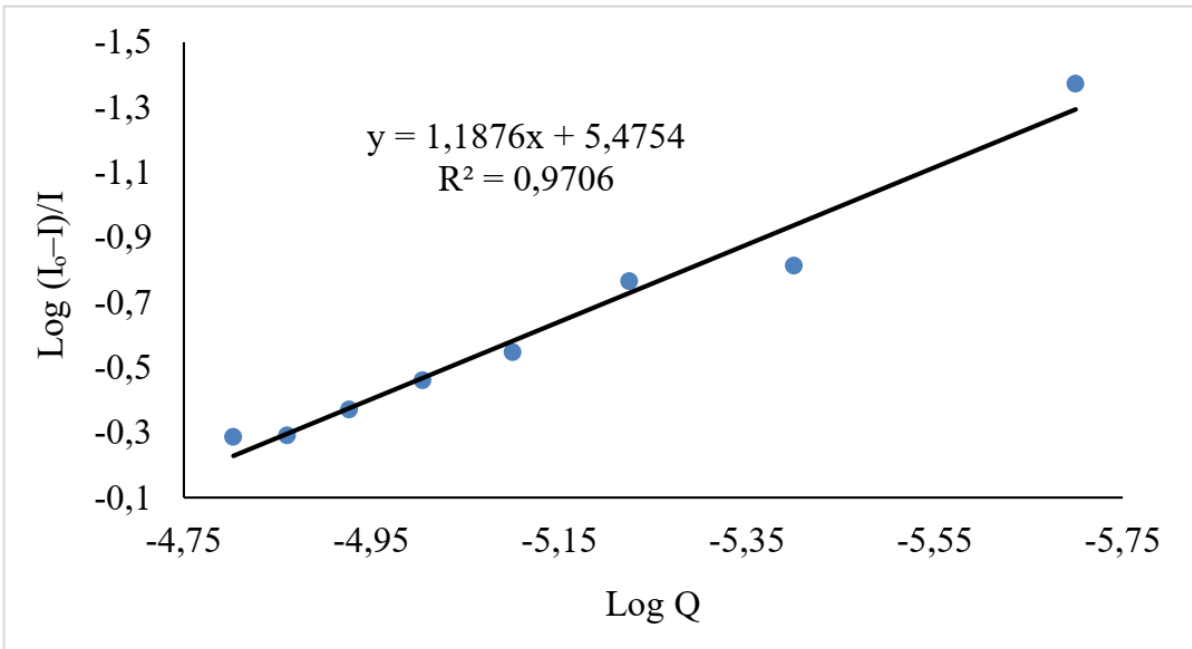

**Figure S28:** The double-logarithmic plot of EB-CT-DNA-Complex 5 interaction at room temperature.

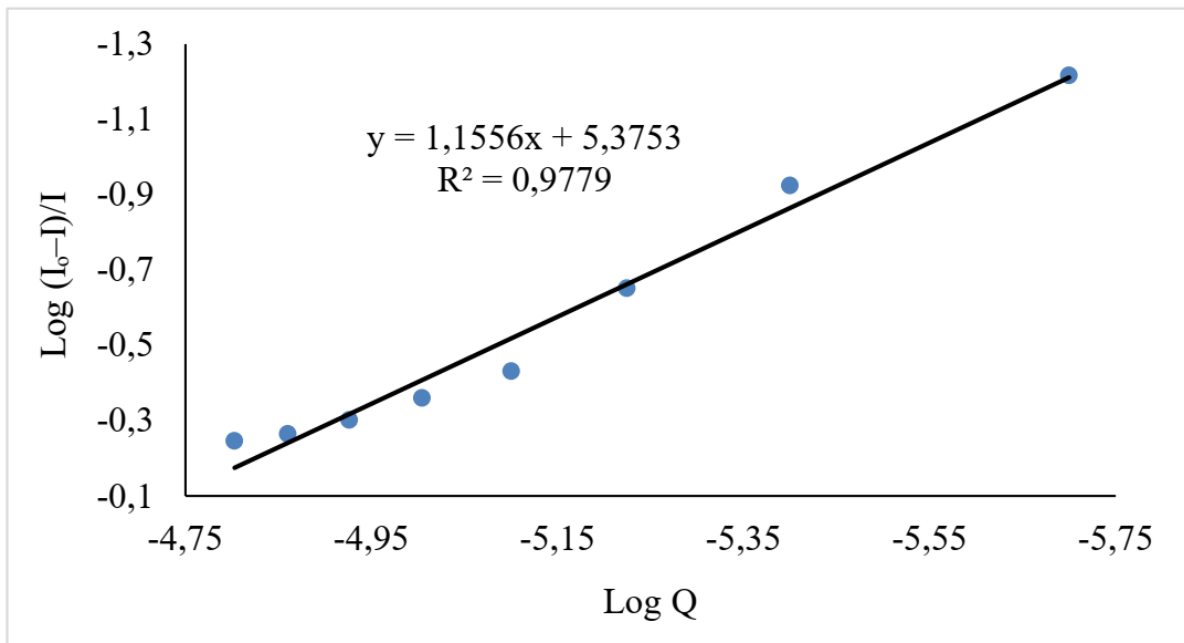

**Figure S29:** The double-logarithmic plot of EB-CT-DNA-Complex 7 interaction at room temperature.

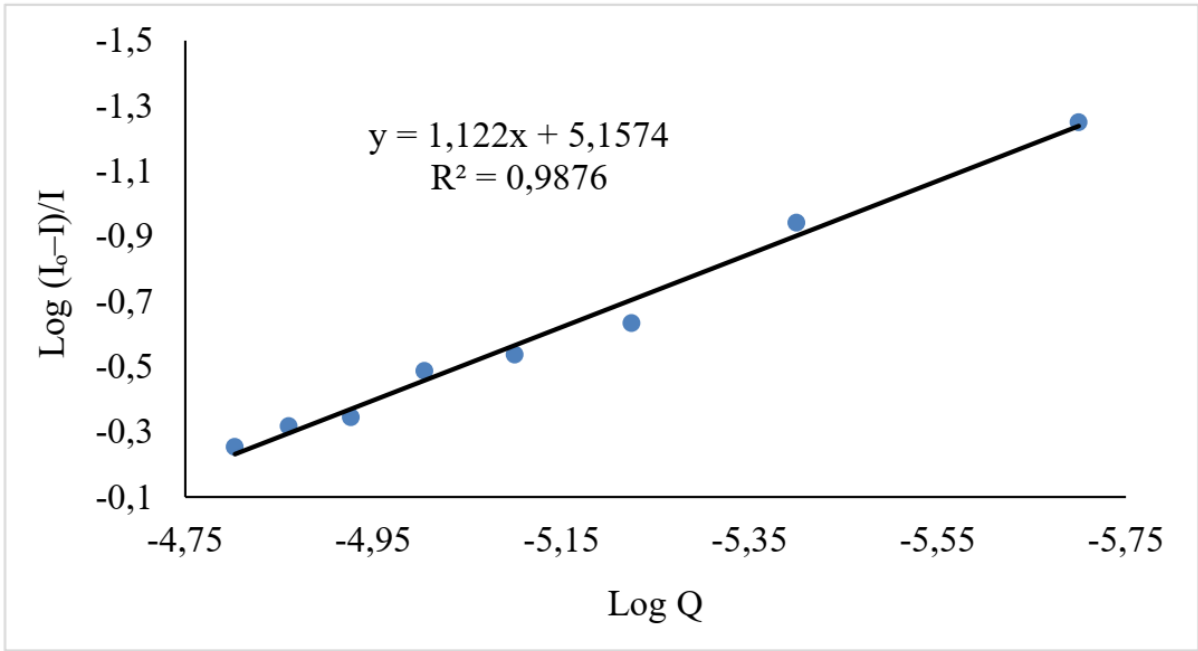

**Figure S30:** The double-logarithmic plot of EB-CT-DNA-Complex 8 interaction at room temperature.

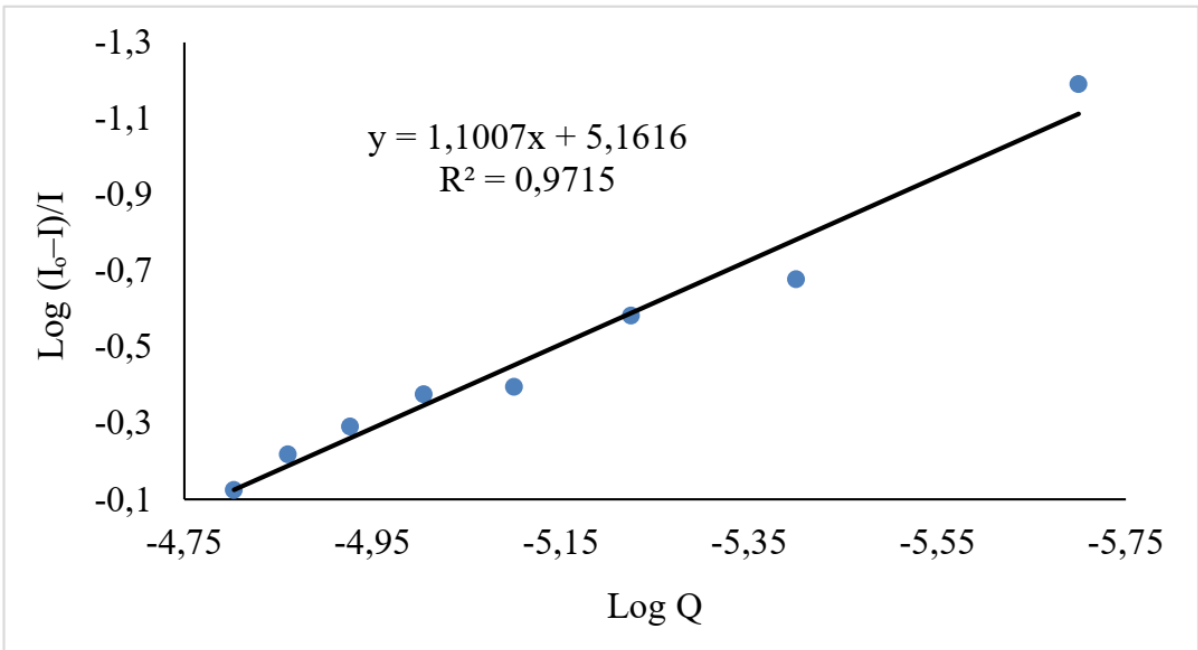

**Figure S31:** The double-logarithmic plot of EB-CT-DNA-Complex 9 interaction at room temperature.



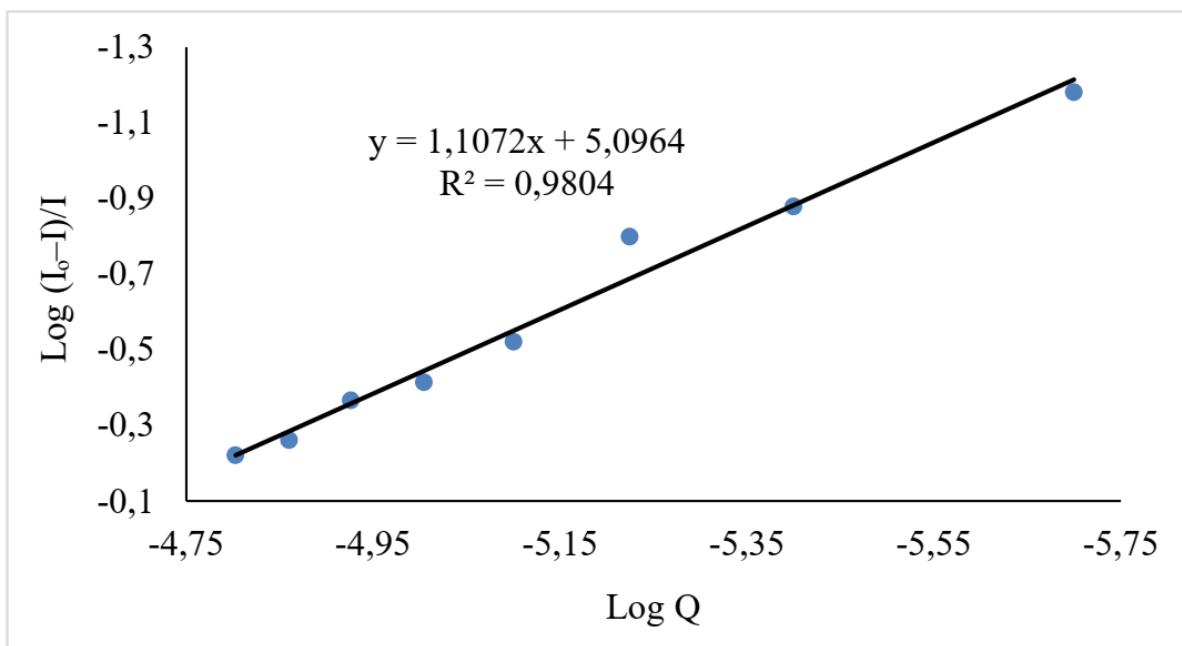

**Figure S32:** The double-logarithmic plot of EB-CT-DNA-Complex 11 interaction at room temperature.

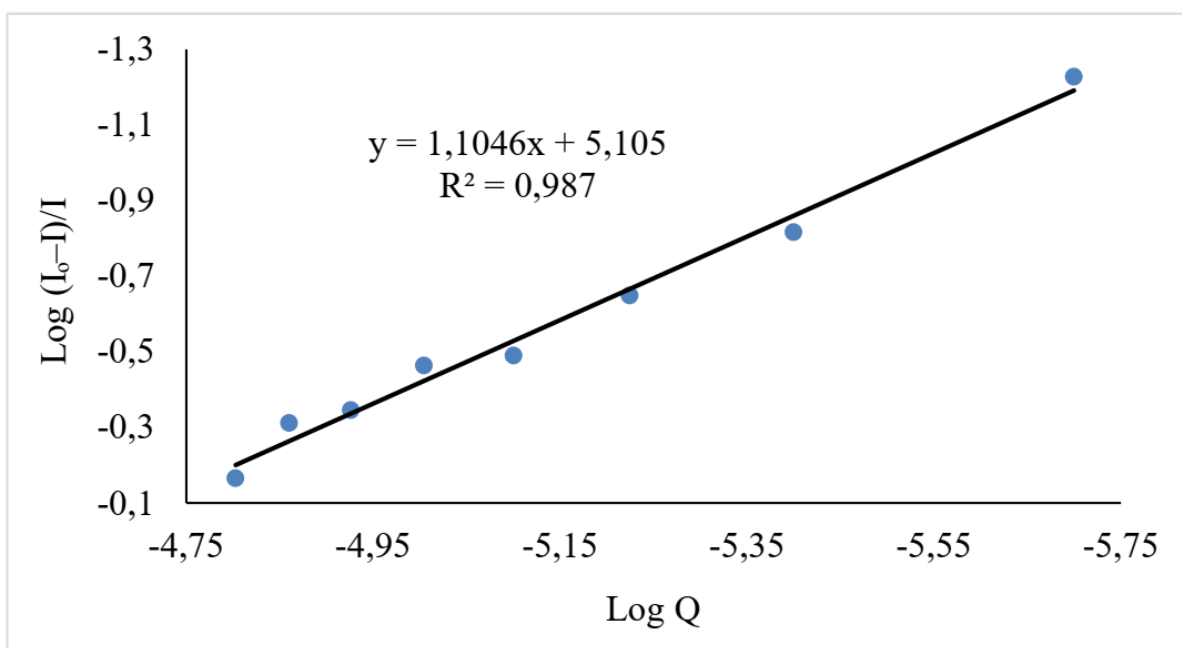

**Figure S33:** The double-logarithmic plot of EB-CT-DNA-Complex 12 interaction at room temperature.

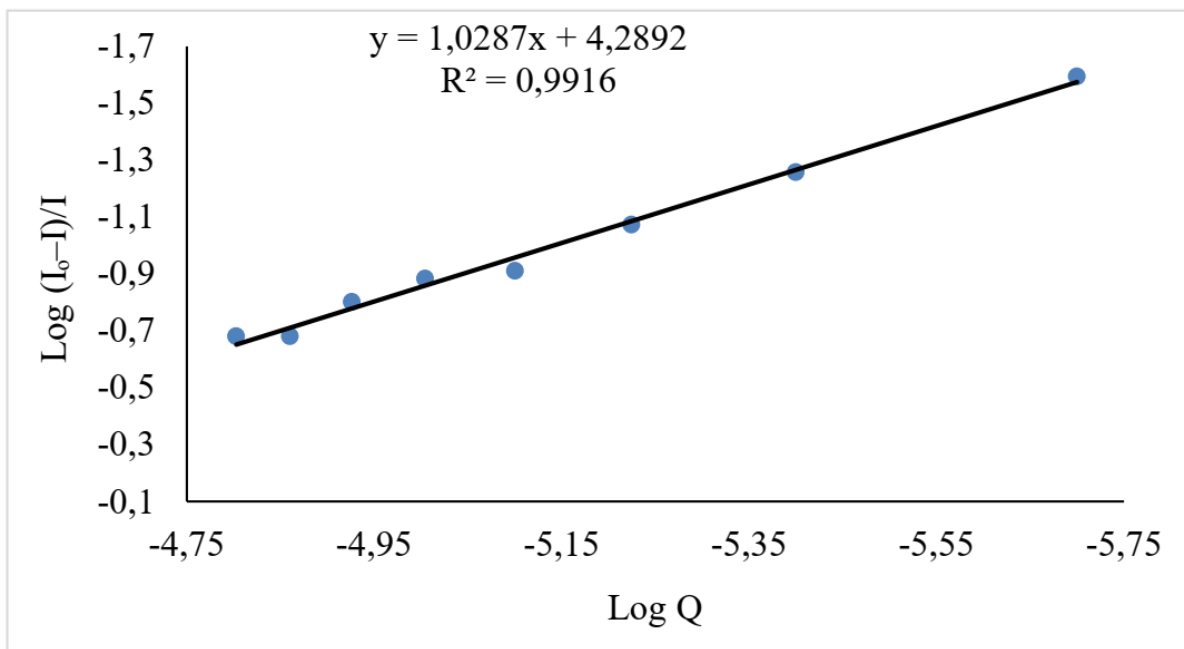

**Figure S34:** The double-logarithmic plot of Hoechst 33342-CT-DNA –Complex 2 interaction at room temperature.

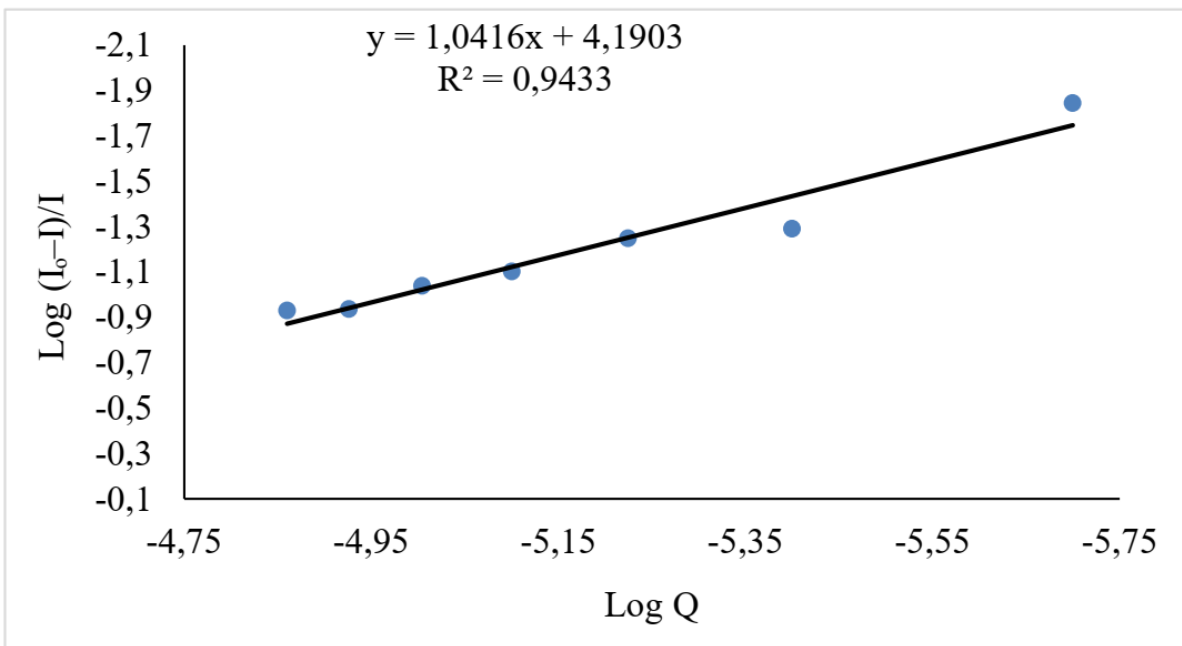

**Figure S35:** The double-logarithmic plot of Hoechst 33342-CT-DNA –Complex **6** interaction at room temperature.

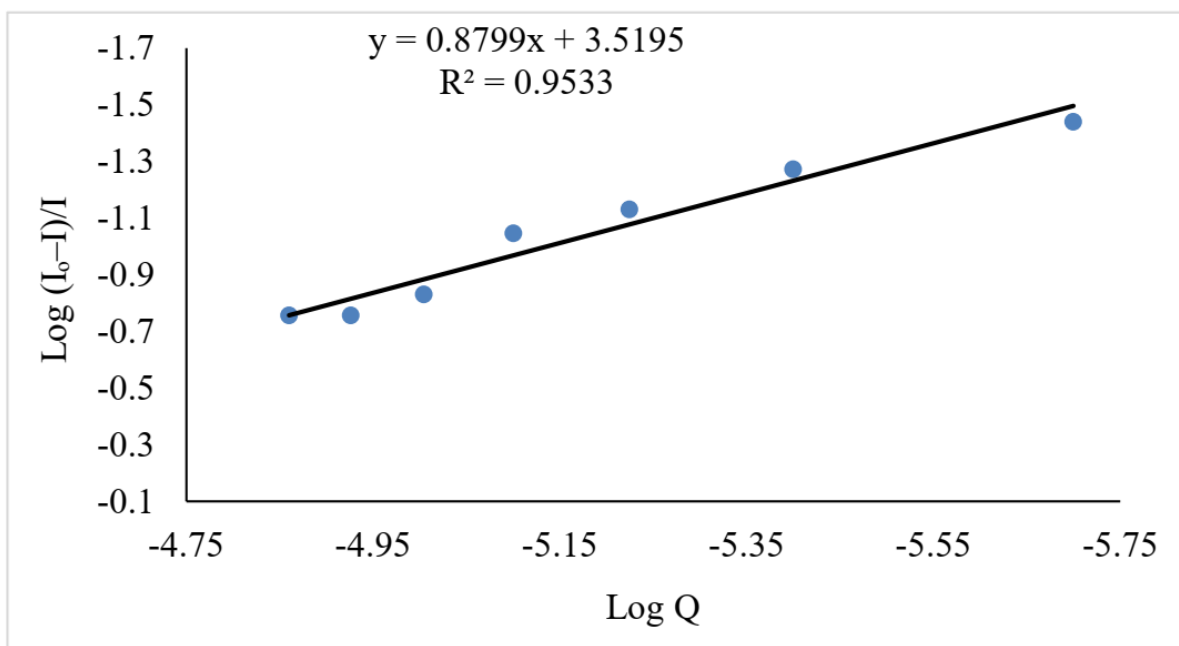

**Figure S36:** The double-logarithmic plot of Hoechst 33342-CT-DNA–Complex **10** interaction at room temperature.

**BSA Binding studies using Electronic Absorption method**

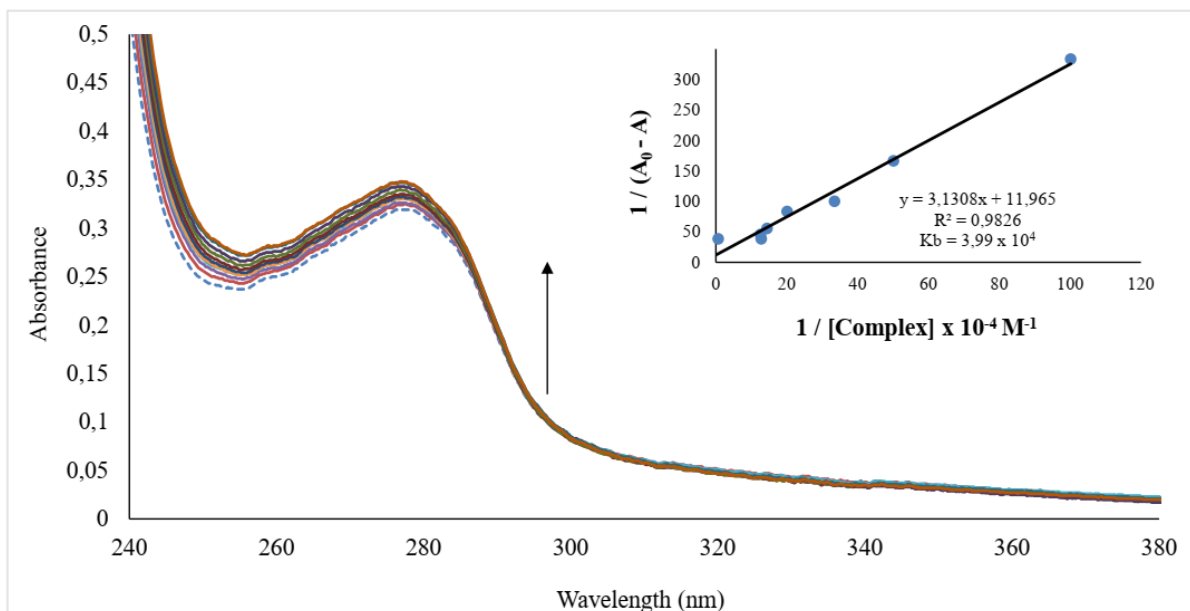

**Figure S37:** Electronic Absorption Spectra of BSA in the absence (dashed line) and the presence of different concentrations of complexes 1. (inset) Plot of  $1/(A_0 - A)$  vs.  $1/[\text{Complex}] \times 10^{-4} \text{ M}^{-1}$

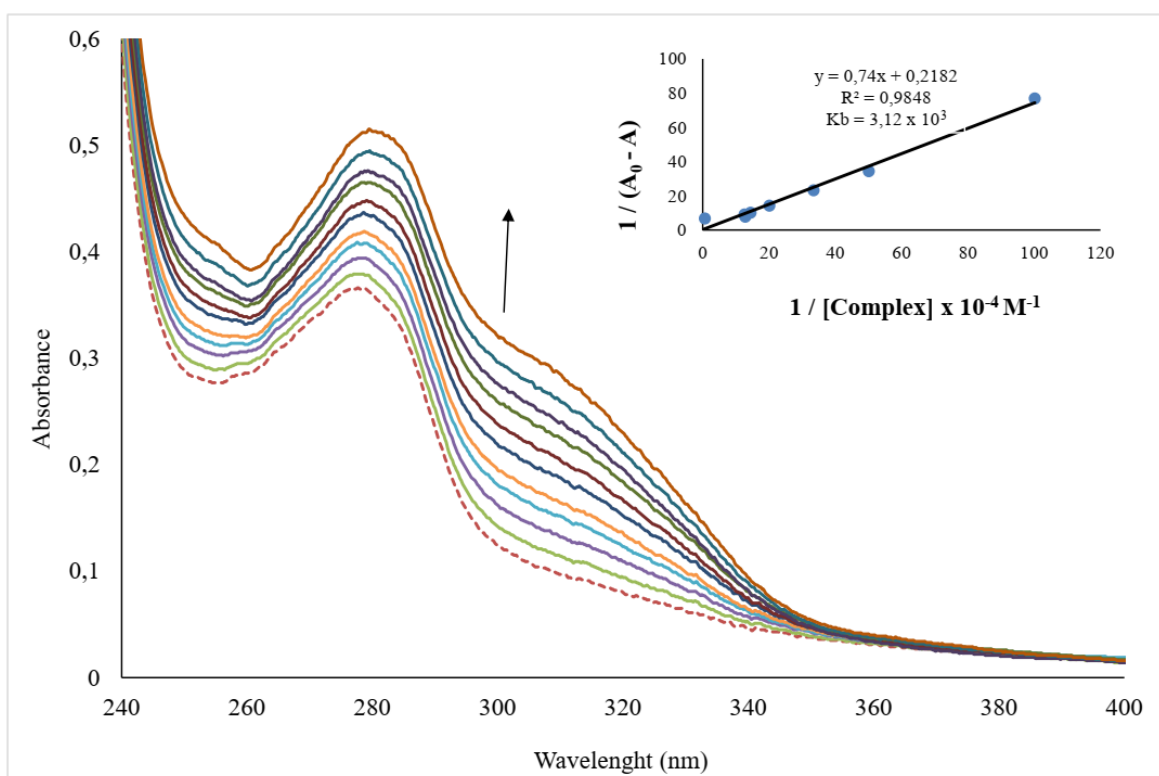

**Figure S38:** Electronic Absorption Spectra of BSA in the absence (dashed line) and the presence of different concentrations of complexes 2. (inset) Plot of  $1/(A_0 - A)$  vs.  $1/[\text{Complex}] \times 10^{-4} \text{ M}^{-1}$

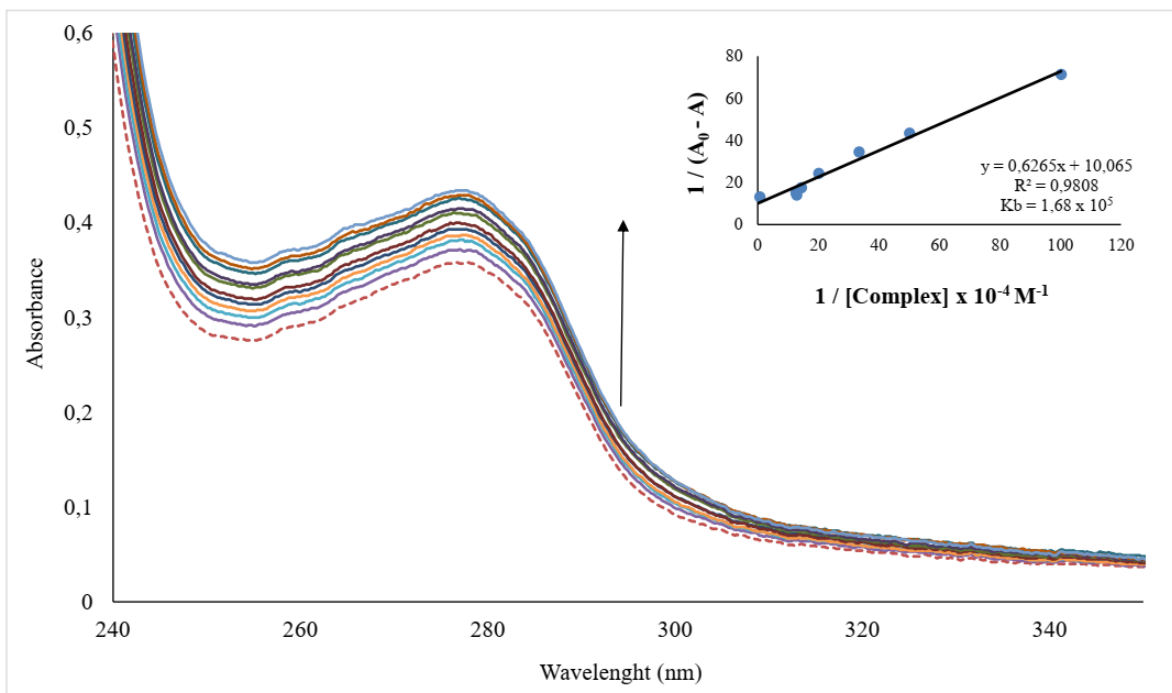

Figure S39: Electronic Absorption Spectra of BSA in the absence (dashed line) and the presence of different concentrations of complex **3**. (inset) plot of  $3 \frac{1}{(A_0 - A)}$  vs.  $1/[Complex] \times 10^{-4} M^{-1}$

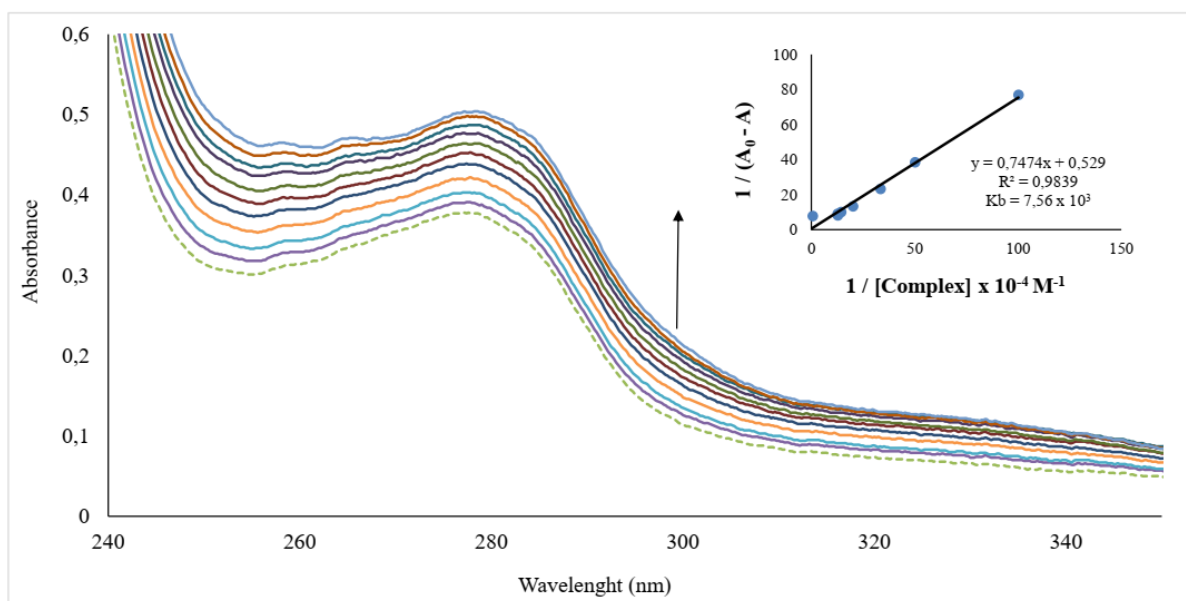

Figure S40: Electronic Absorption Spectra of BSA in the absence (dashed line) and the presence of different concentrations of complexes **4**. (inset) Plot of  $1/(A_0 - A)$  vs.  $1/[Complex] \times 10^{-4} M^{-1}$

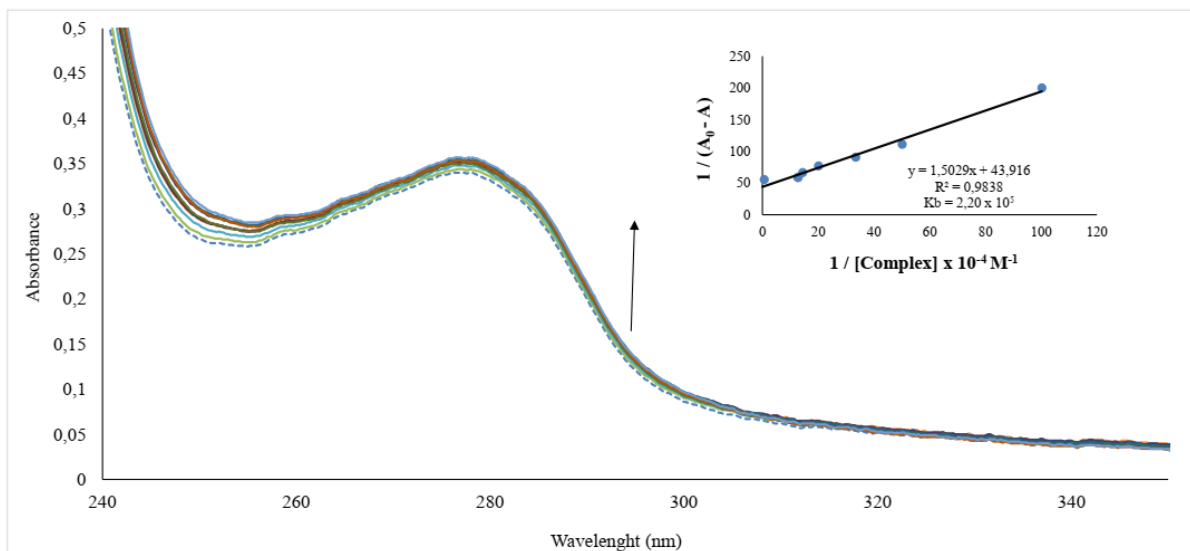

**Figure S41:** Electronic Absorption Spectra of BSA in the absence (dashed line) and the presence of different concentrations of complexes **5**. (inset) Plot of  $1/(A_0 - A)$  vs.  $1/[\text{Complex}] \times 10^{-4} \text{ M}^{-1}$

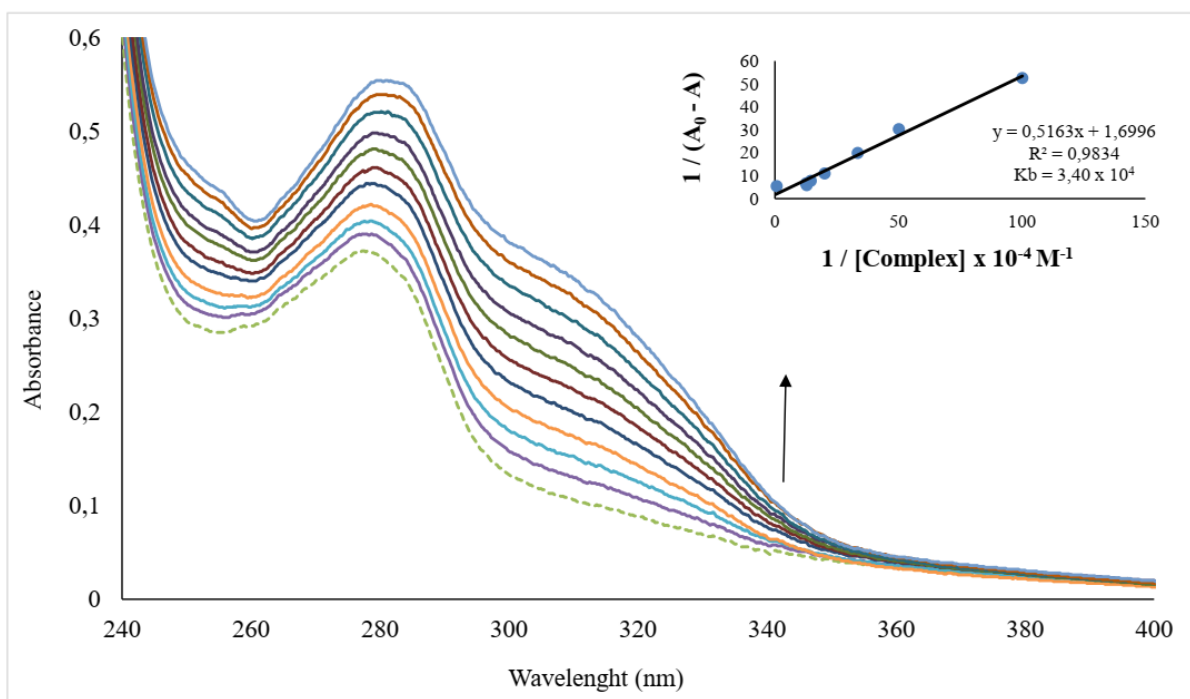

**Figure S42:** Electronic Absorption Spectra of BSA in the absence (dashed line) and the presence of different concentrations of complexes **6**. (inset) Plot of  $1/(A_0 - A)$  vs.  $1/[\text{Complex}] \times 10^{-4} \text{ M}^{-1}$

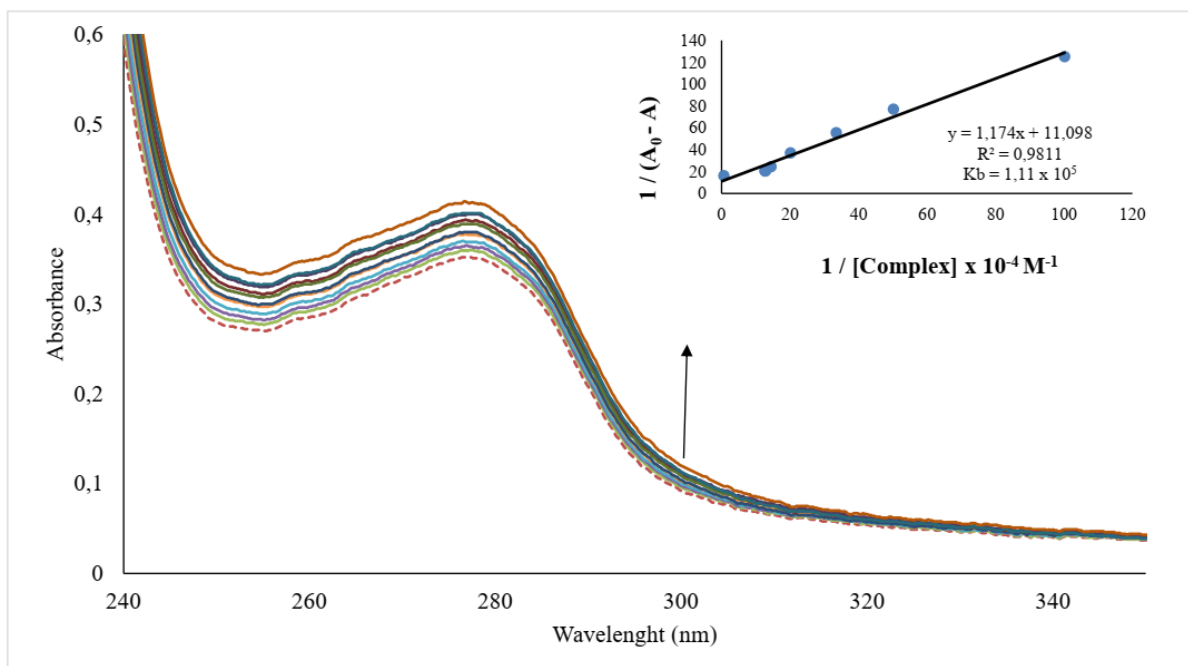

**Figure S43:** Electronic Absorption Spectra of BSA in the absence (dashed line) and the presence of different concentrations of complexes **7**. (inset) Plot of  $1/(A_0 - A)$  vs.  $1/[Complex] \times 10^{-4} M^{-1}$

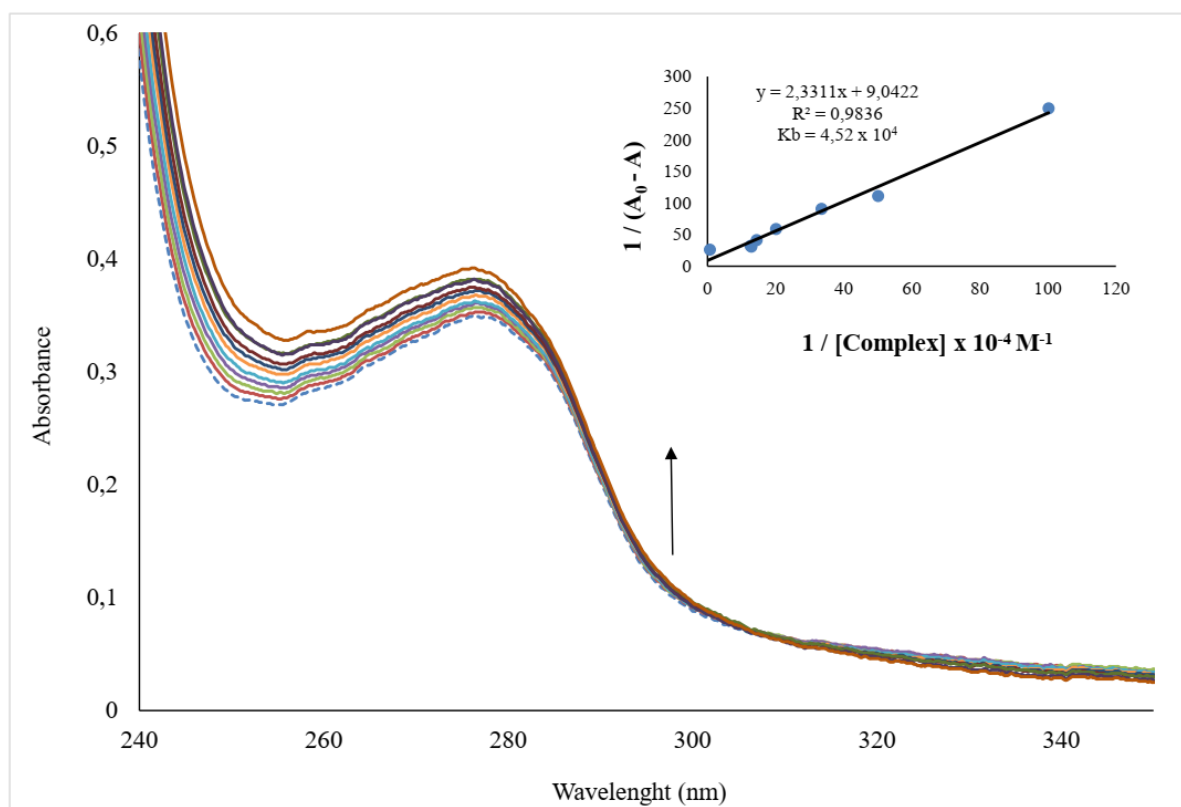

**Figure S44:** Electronic Absorption Spectra of BSA in the absence (dashed line) and the presence of different concentrations of complexes **8**. (inset) Plot of  $1/(A_0 - A)$  vs.  $1/[Complex] \times 10^{-4} M^{-1}$

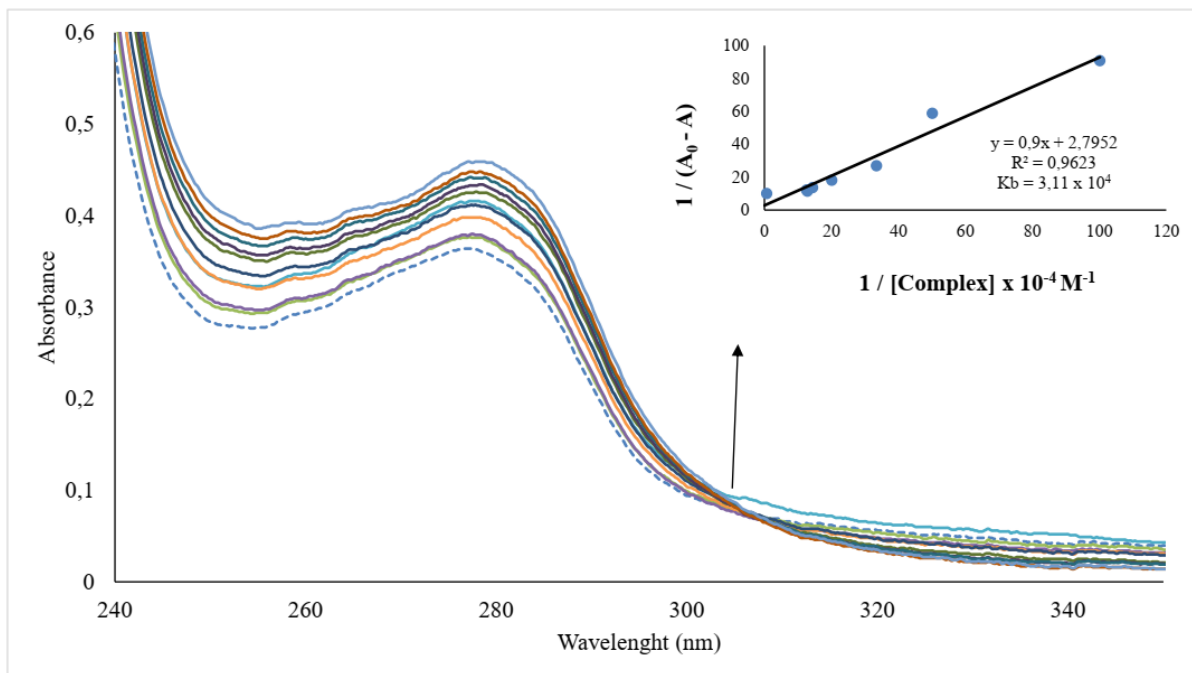

**Figure S45:** Electronic Absorption Spectra of BSA in the absence (dashed line) and the presence of different concentrations of complexes **9**. (inset) Plot of  $1/(A_0 - A)$  vs.  $1/[\text{Complex}] \times 10^{-4} \text{ M}^{-1}$

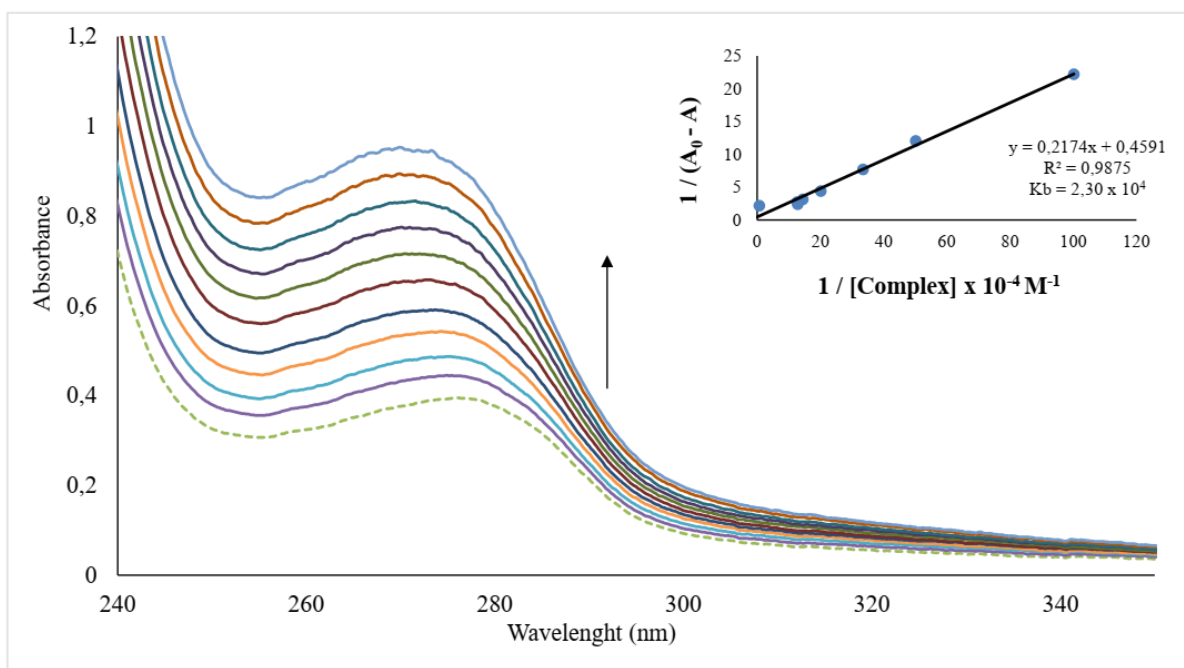

**Figure S46:** Electronic Absorption Spectra of BSA in the absence (dashed line) and the presence of different concentrations of complexes **11**. (inset) Plot of  $1/(A_0 - A)$  vs.  $1/[\text{Complex}] \times 10^{-4} \text{ M}^{-1}$



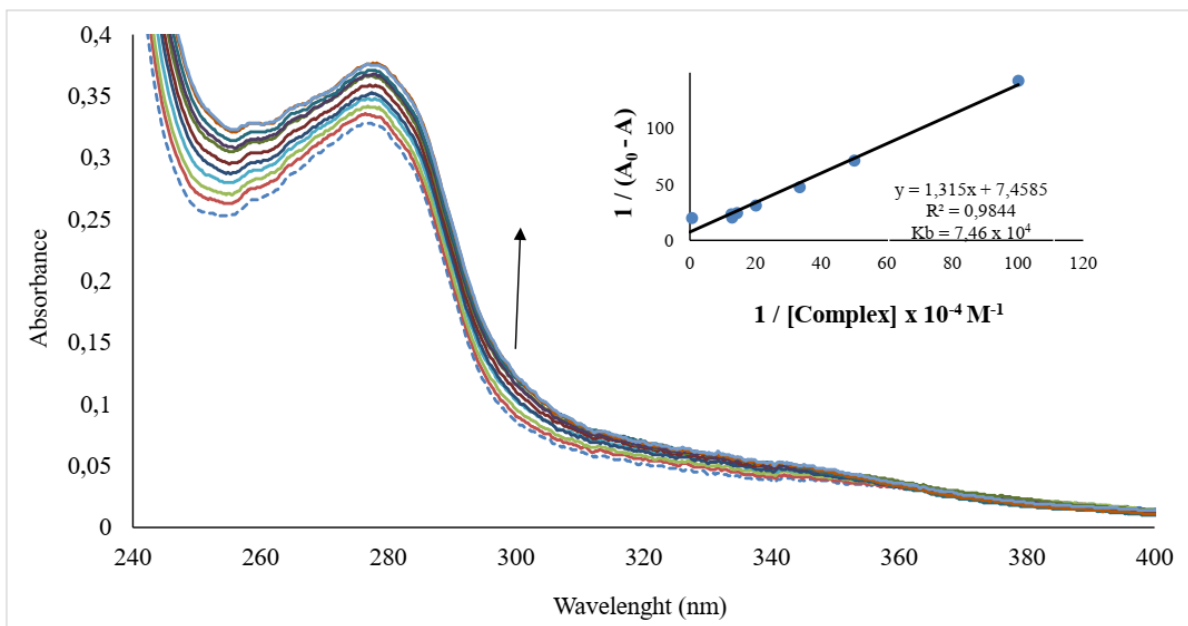

**Figure S47:** Electronic Absorption Spectra of BSA in the absence (dashed line) and the presence of different concentrations of complexes **12**. (inset) Plot of  $1/(A_0 - A)$  vs.  $1/[\text{Complex}] \times 10^{-4} \text{M}^{-1}$

#### BSA Binding studies using the Fluorescence method

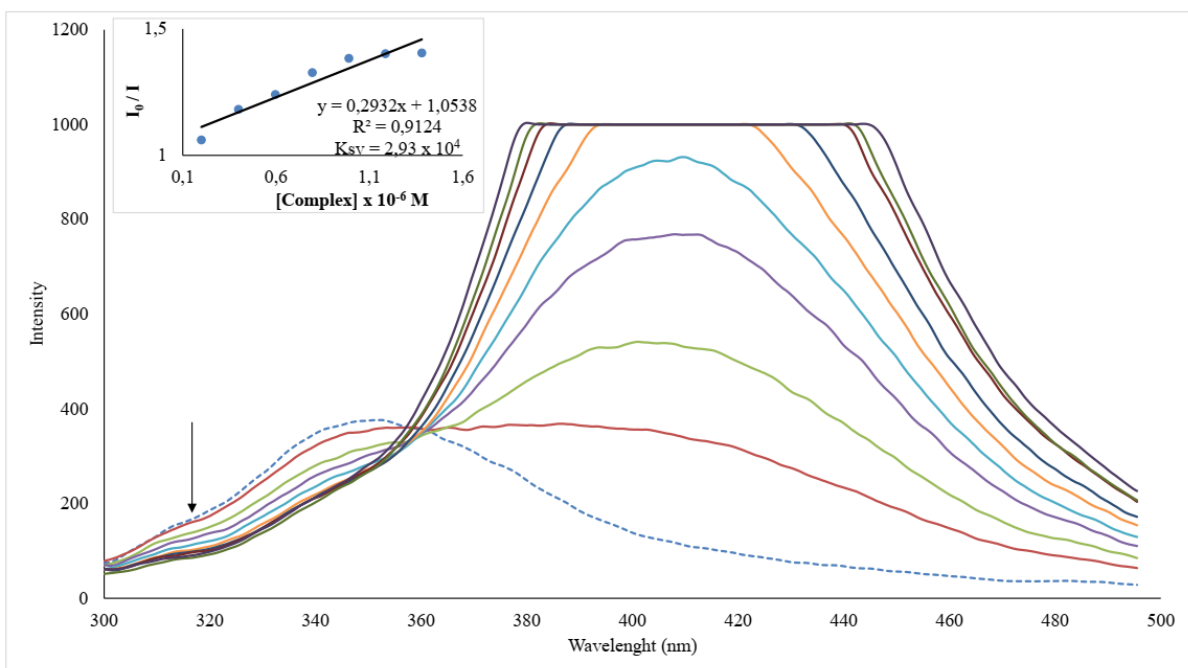

**Figure S48:** Fluorescence emission spectra of BSA in the absence (dashed line) and the presence of different concentration of complex **2**. (inset) Stern-Volmer plot of complex **2** interaction with BSA

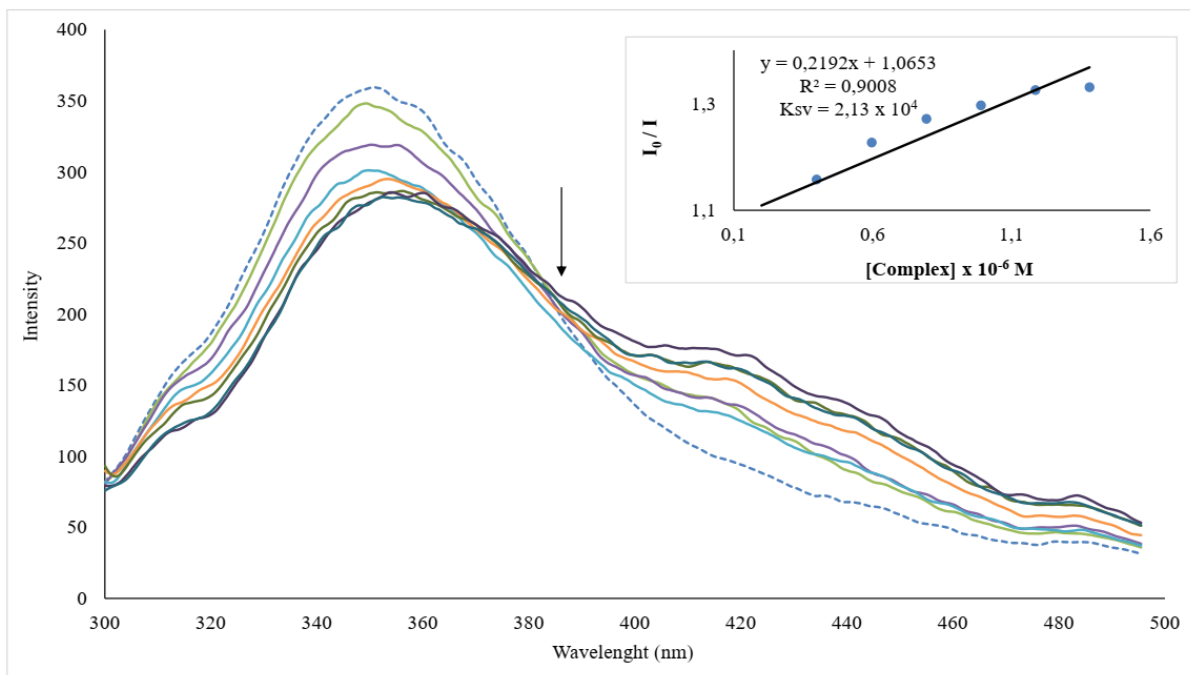

**Figure S49:** Fluorescence emission spectra of BSA in the absence (dashed line) and the presence of different concentrations of complex **3**. (inset) Stern-Volmer plot of complex **3** interaction with BSA.

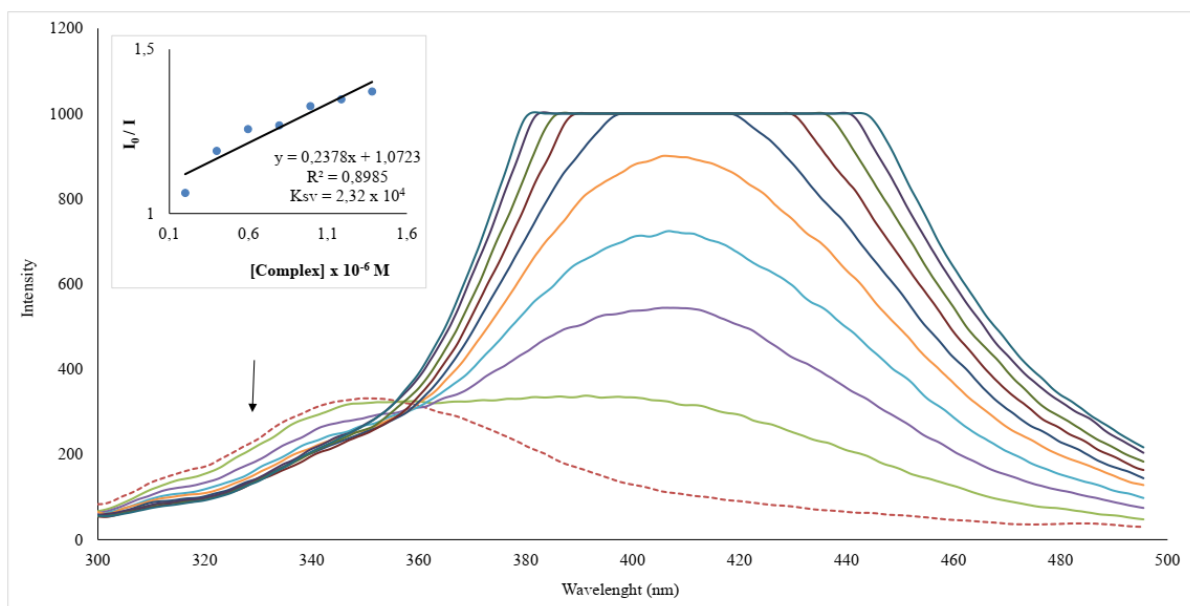

**Figure S50:** Fluorescence emission spectra of BSA in the absence (dashed line) and the presence of different concentrations of complex **6**. (inset) Stern-Volmer plot of complex **6** interaction with BSA

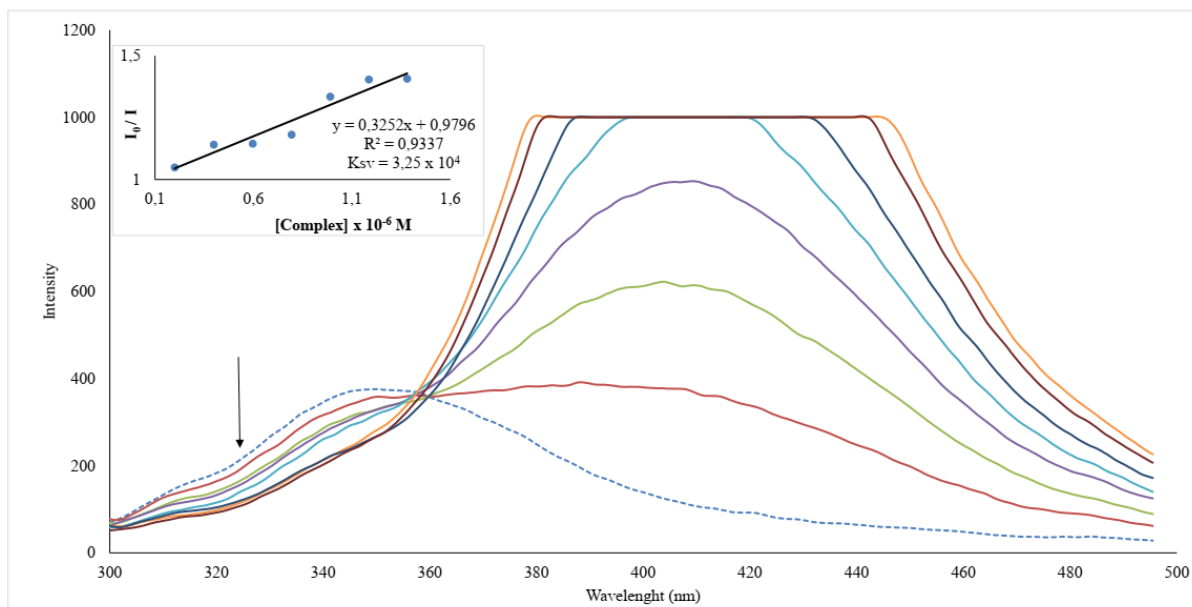

**Figure S51:** Fluorescence emission spectra of BSA in the absence(dashed line) and the presence of different concentrations of complex **10**. (inset) Stern-Volmer plot of complex **10** interaction with BSA

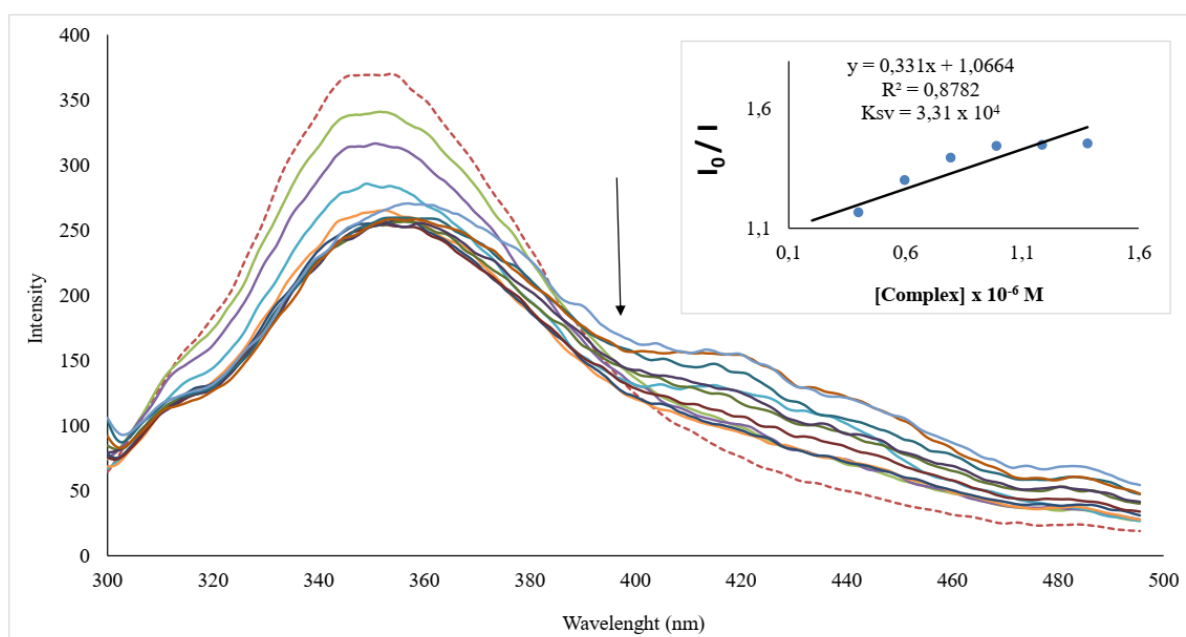

**Figure S52:** Fluorescence emission spectra of BSA in the absence(dashed line) and the presence of different concentrations of complex **11**. (inset) Stern-Volmer plot of complex **11** interaction with BSA

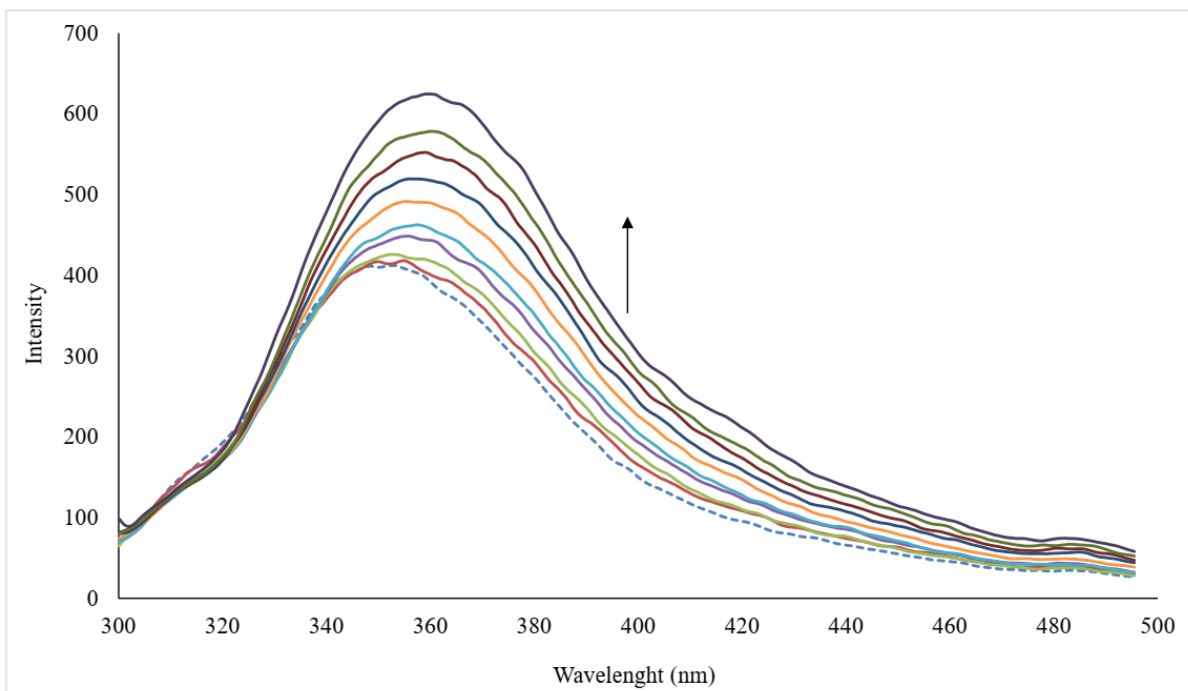

**Figure S53:** Fluorescence emission spectra of BSA in the absence(dashed line) and the presence of different concentration of complex 1

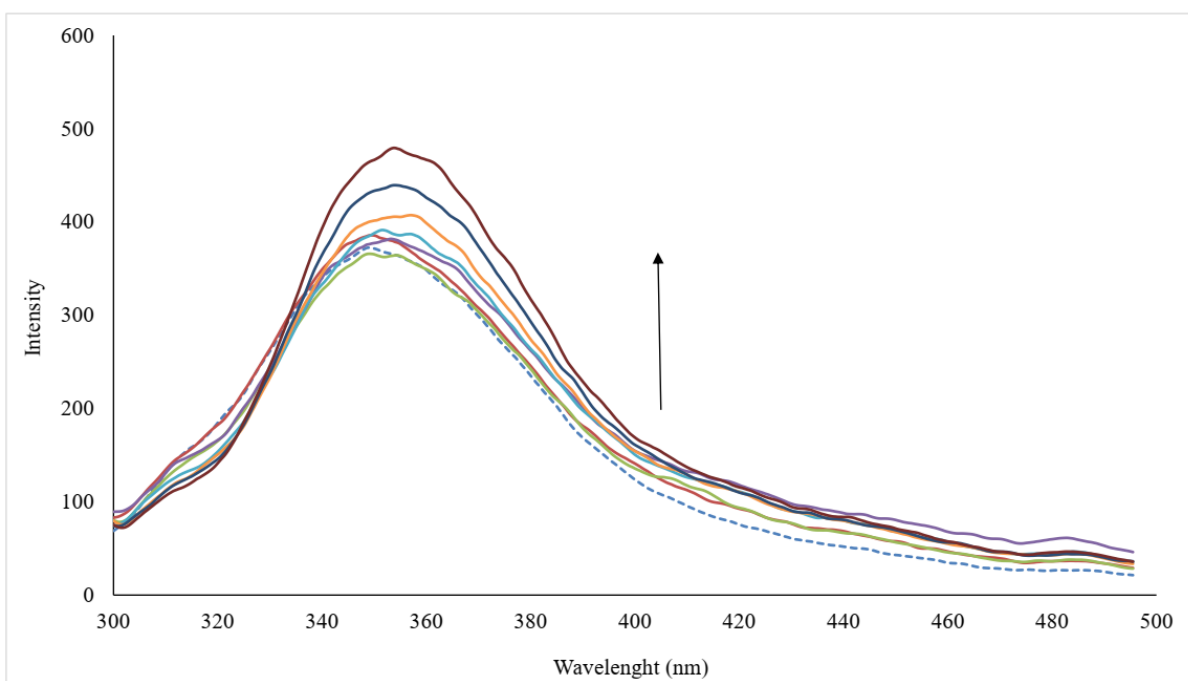

**Figure S54:** Fluorescence emission spectra of BSA in the absence(dashed line) and the presence of different concentrations of complex 4.

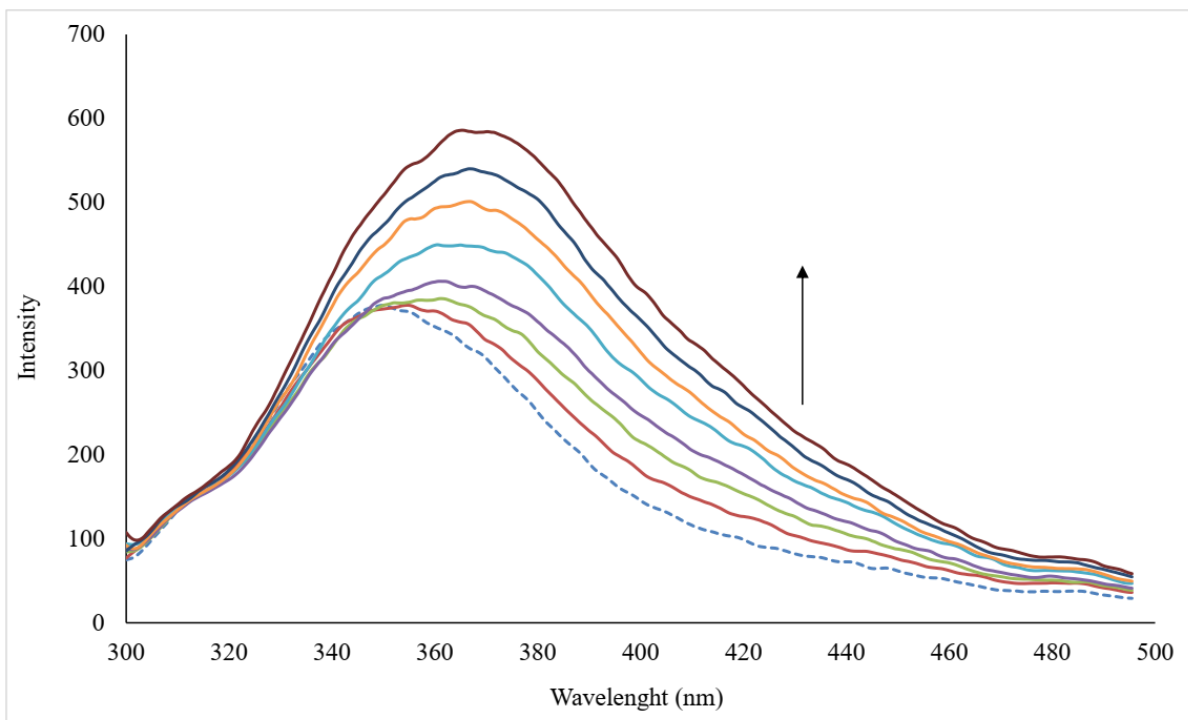

**Figure S55:** Fluorescence emission spectra of BSA in the absence(dashed line) and the presence of different concentration of complex **5**

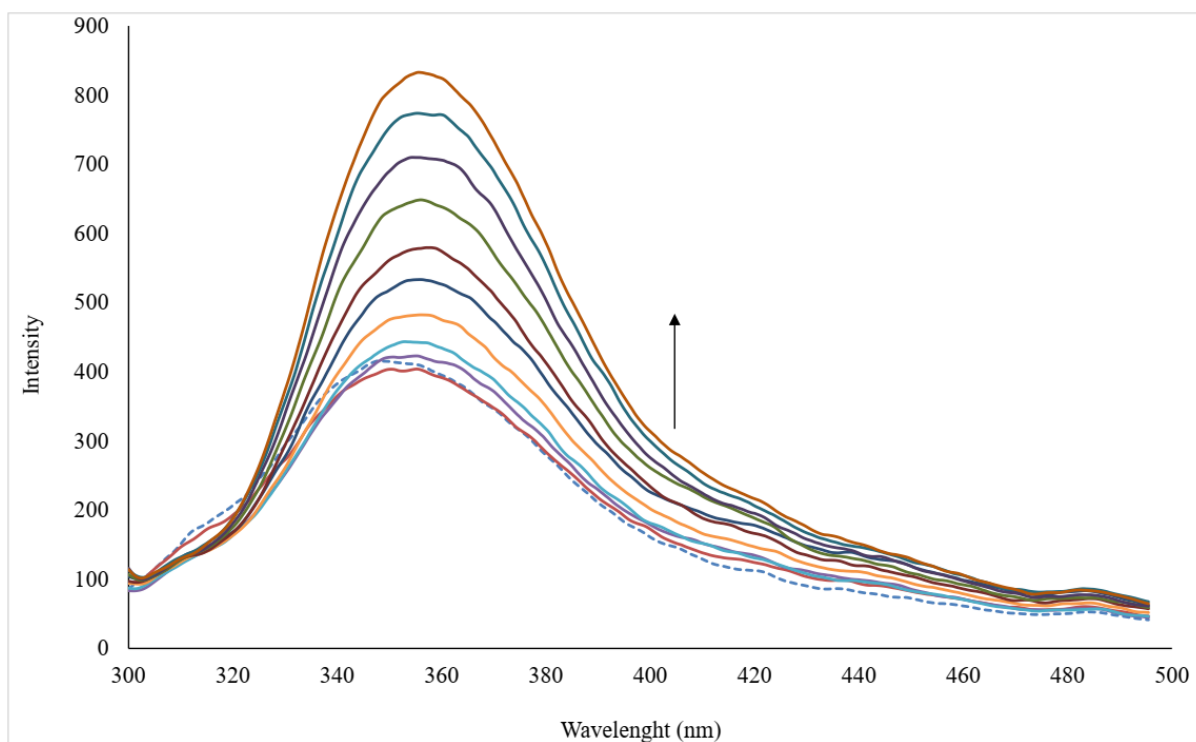

**Figure S56:** Fluorescence emission spectra of BSA in the absence(dashed line) and the presence of different concentrations of complex **8**.

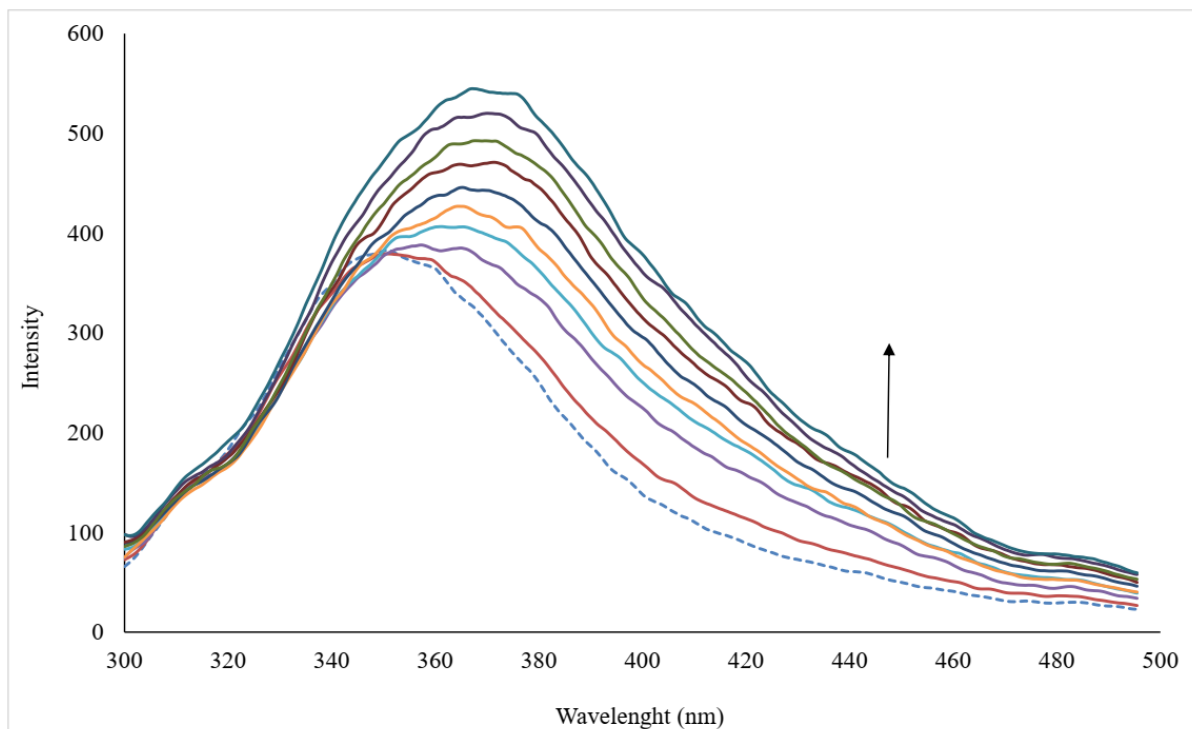

**Figure S57:** Fluorescence emission spectra of BSA in the absence(dashed line) and the presence of different concentrations of complex **9**. (inset) Stern-Volmer plot of complex **9** interaction with BSA

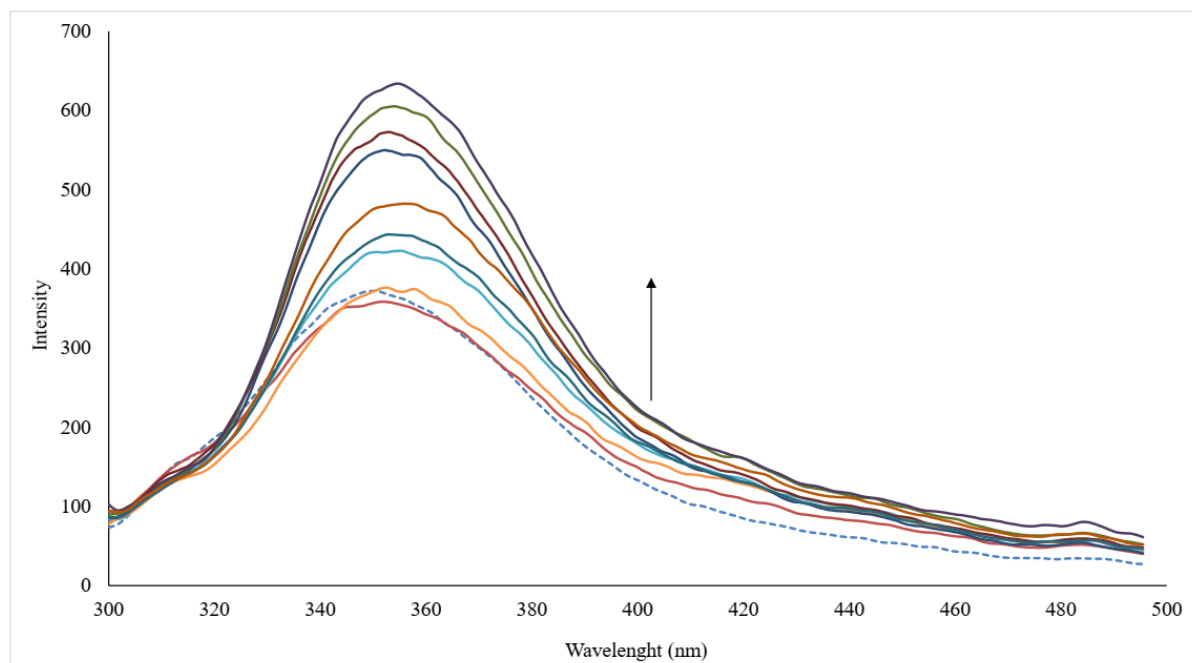

**Figure S58:** Fluorescence emission spectra of BSA in the absence(dashed line) and the presence of different concentrations of complex **12**. (inset) Stern-Volmer plot of complex **12** interaction with BSA

**The double-logarithmic plot of BSA–Complexes interactions at room temperature.**

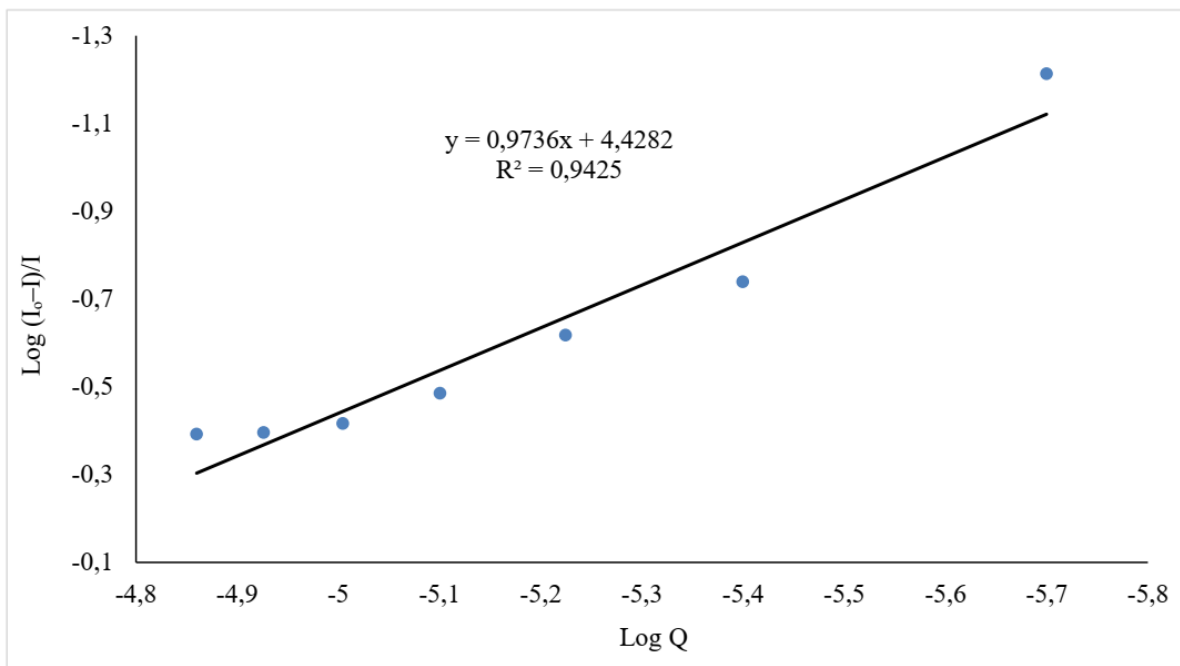

**Figure S59:** The double-logarithmic plot of BSA–Complex 2 interactions.

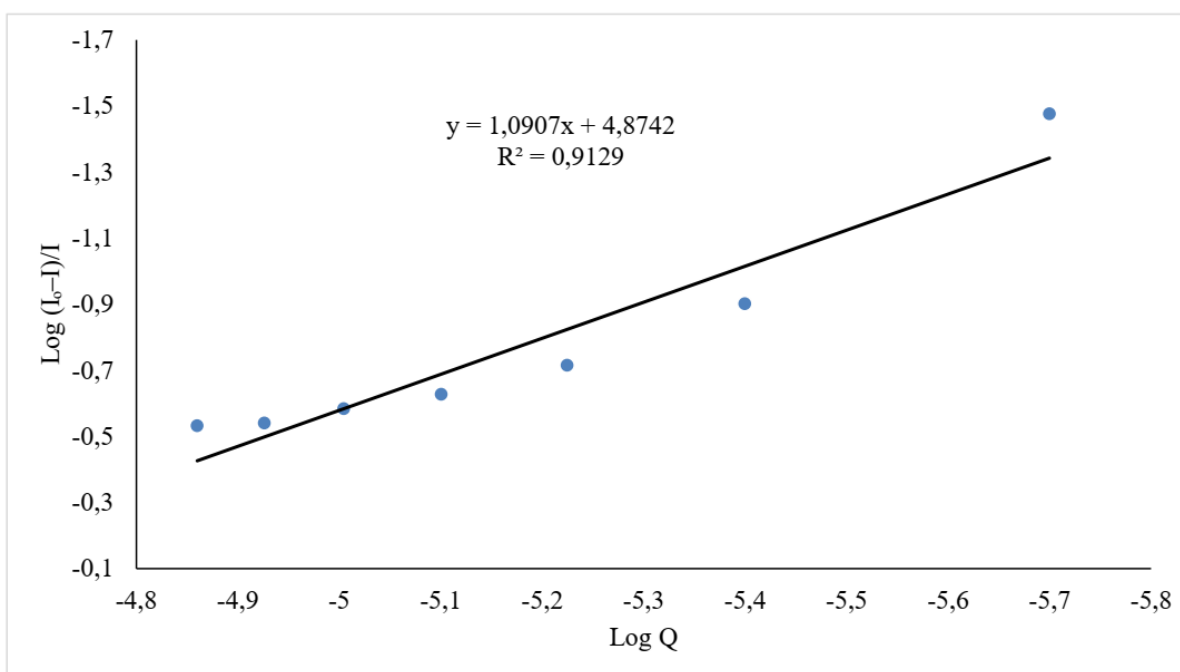

**Figure S60:** The double-logarithmic plot of BSA–Complex 3 interactions.

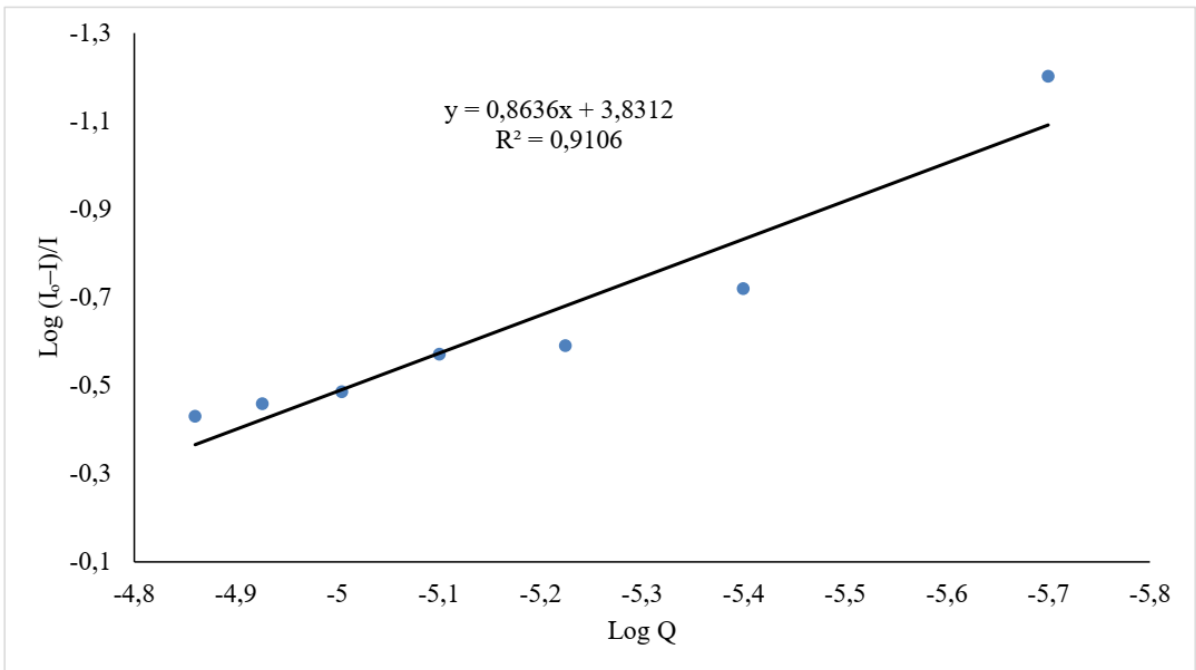

**Figure S61:** The double-logarithmic plot of BSA–Complex 6 interactions

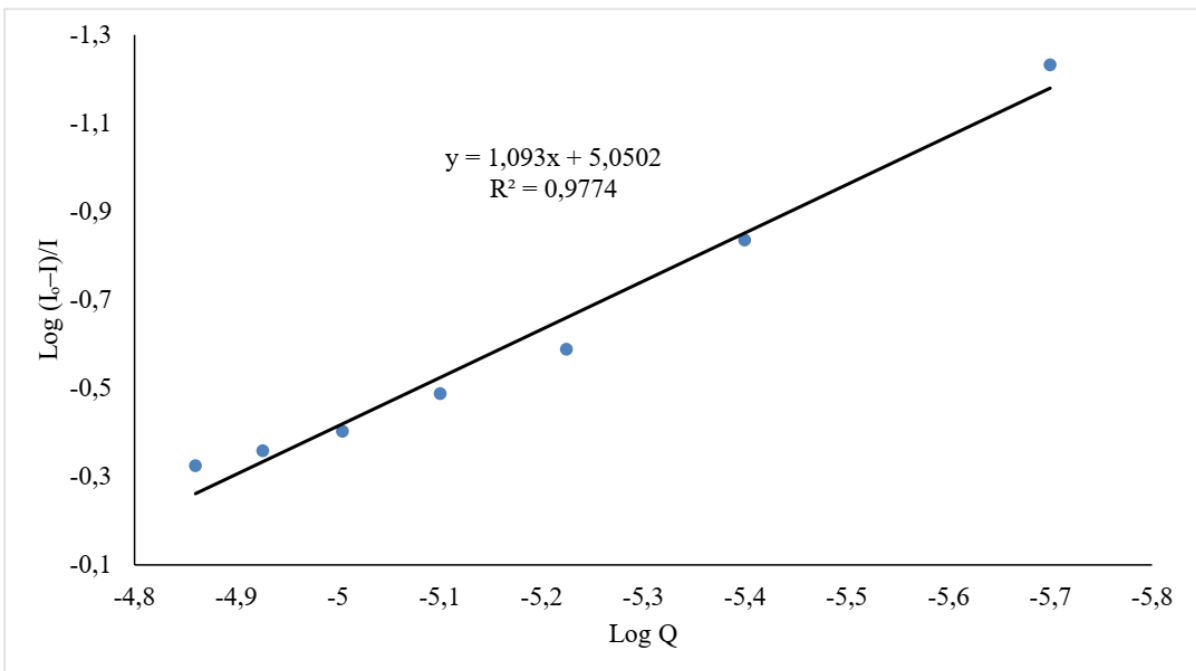

**Figure S62:** The double-logarithmic plot of BSA–Complex 7 interactions



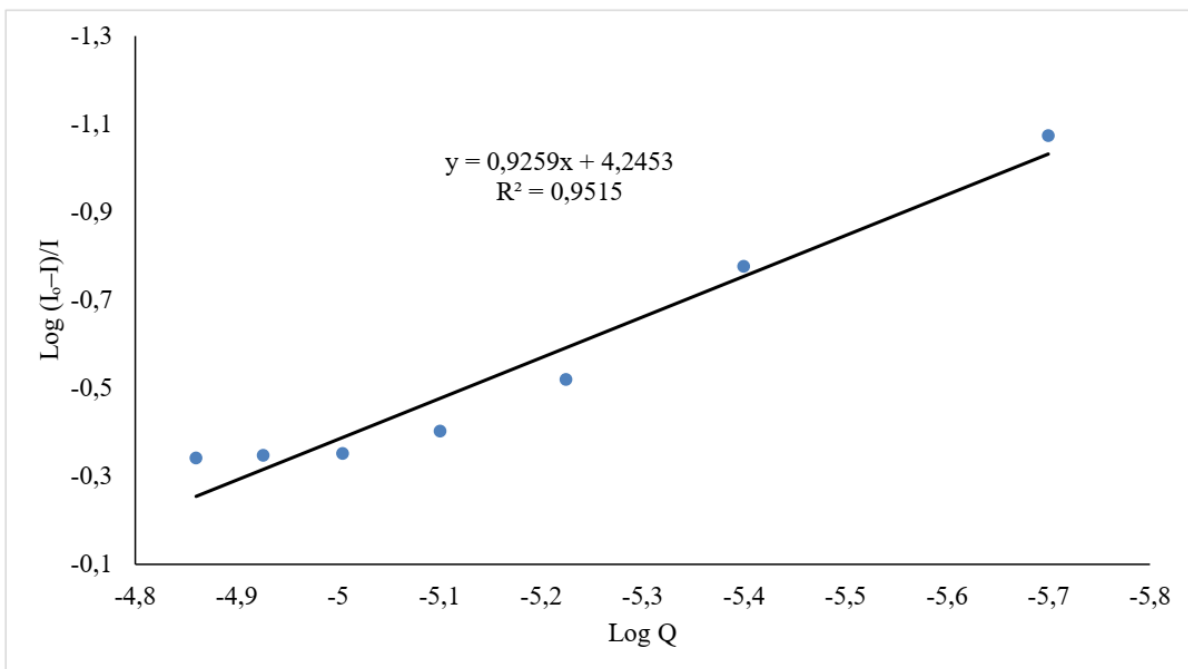

**Figure S63:** The double-logarithmic plot of BSA–Complex **11** interactions

# <sup>1</sup>H-NMR Spectra of Ligands E<sub>a-d</sub>

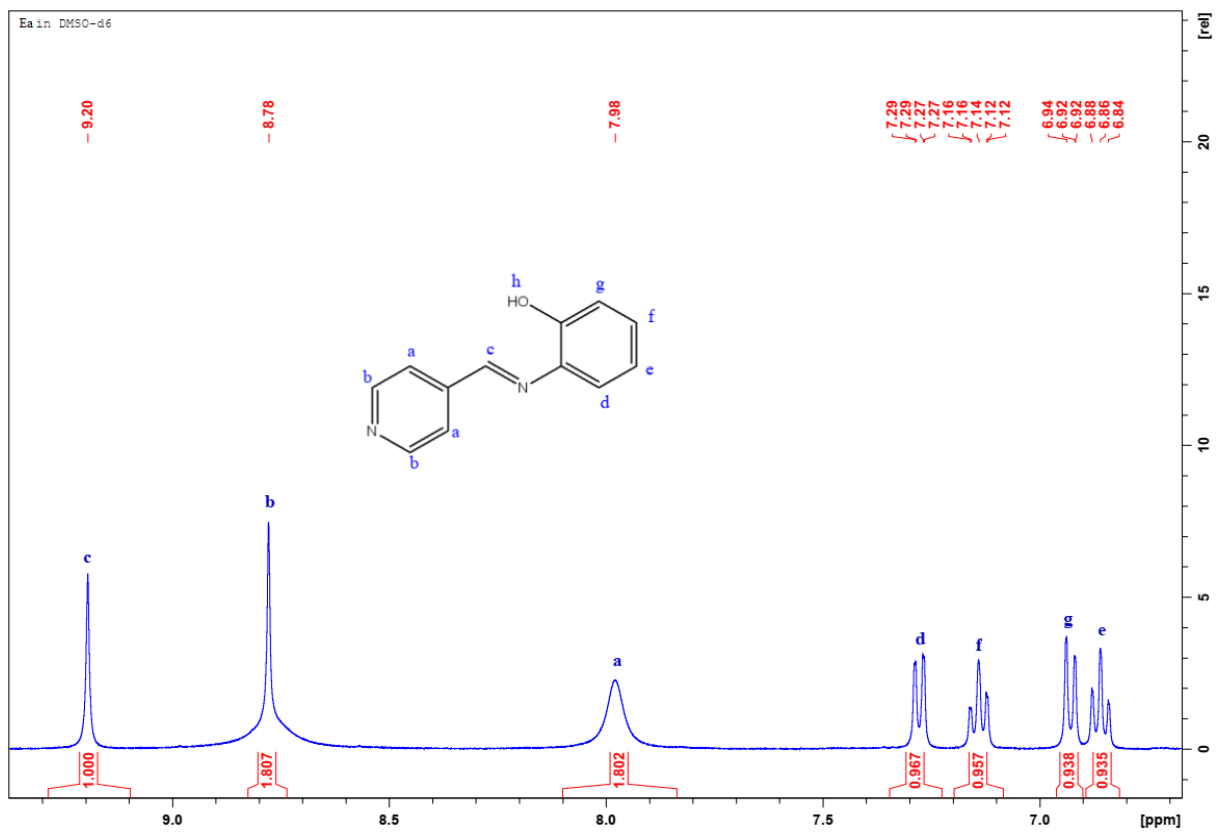

Figure S64: E)-2-((pyridin-4-ylmethylene)amino)phenol E<sub>a</sub>

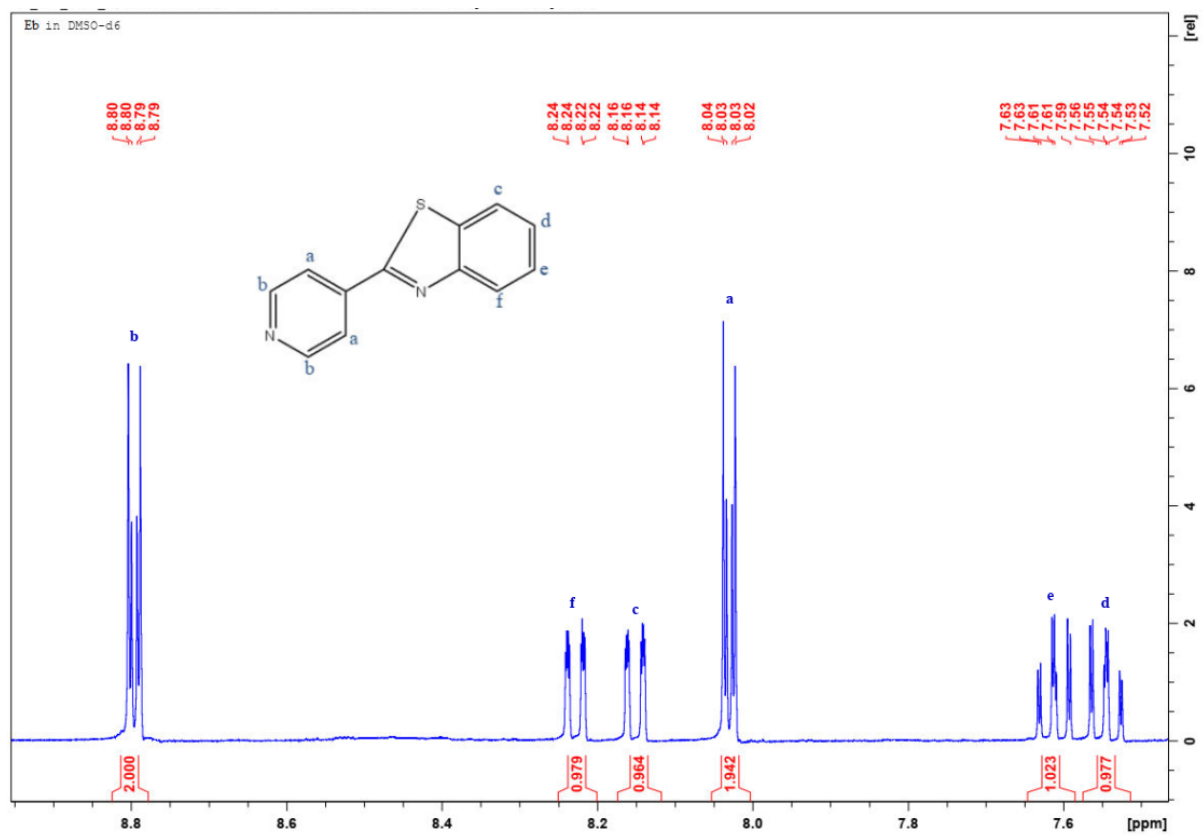

Figure S65: 2-(pyridin-4-yl)benzo[d]thiazole E<sub>b</sub>

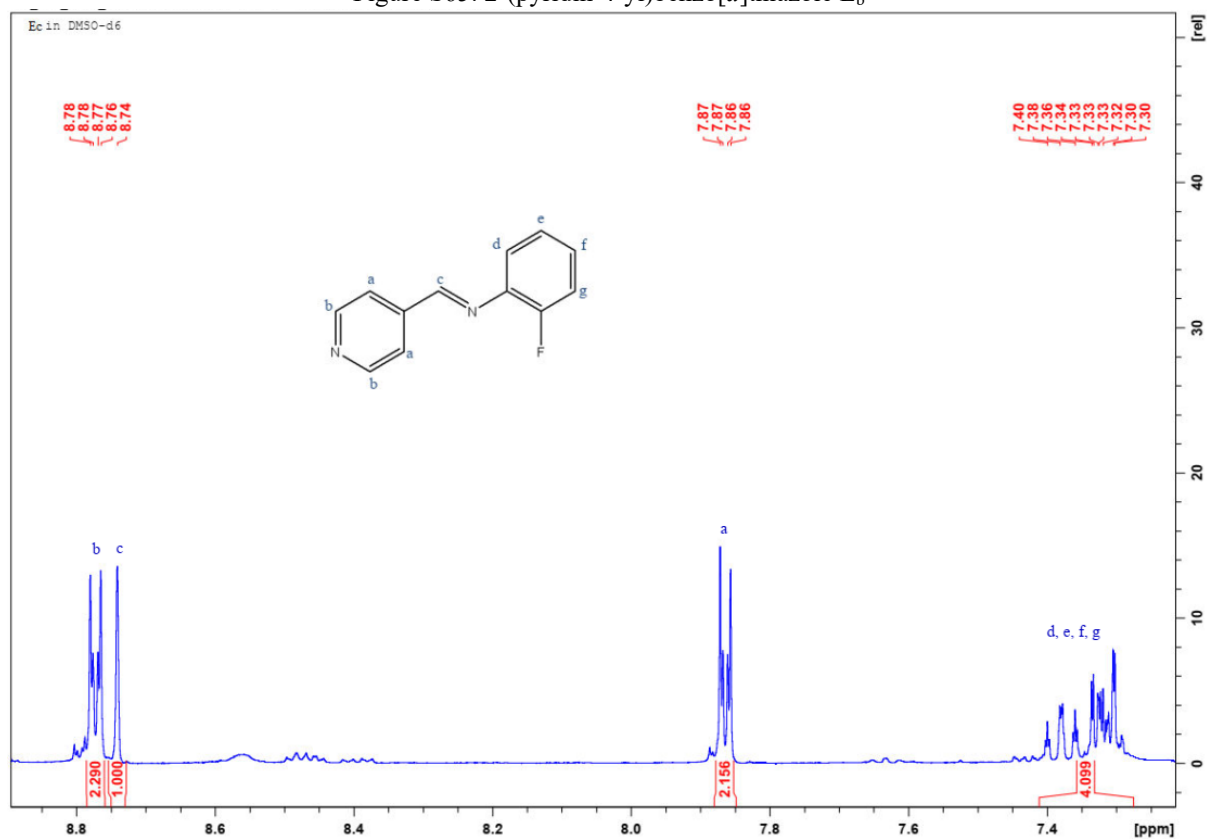

Figure S66: (E)-N-(2-fluorophenyl)-1-(pyridin-4-yl)methanimine E<sub>c</sub>

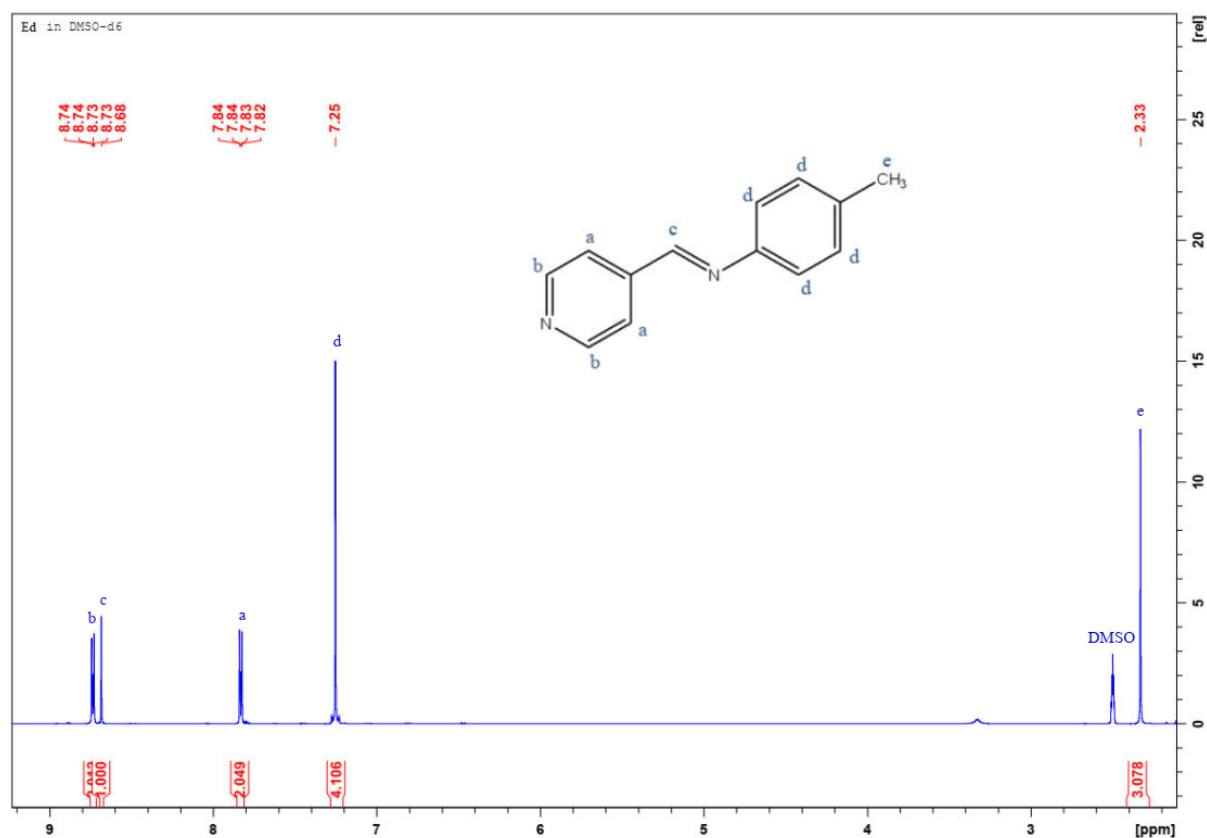

Figure S67: (E)-1-(pyridin-4-yl)-N-(p-tolyl)methanimine E<sub>d</sub>

# <sup>1</sup>H-NMR SPECTRA OF COMPLEXES 1-12

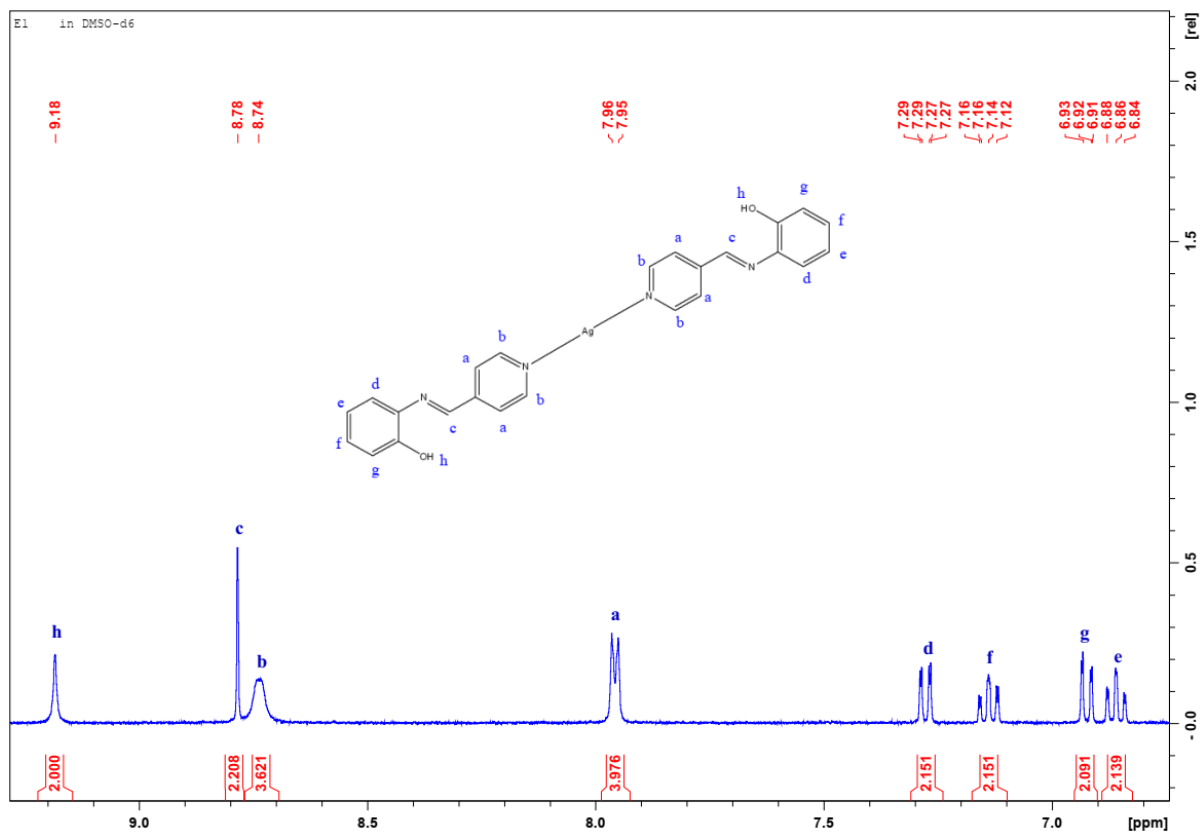

Figure S68:  $[Ag(E_a)_2]NO_3$  1

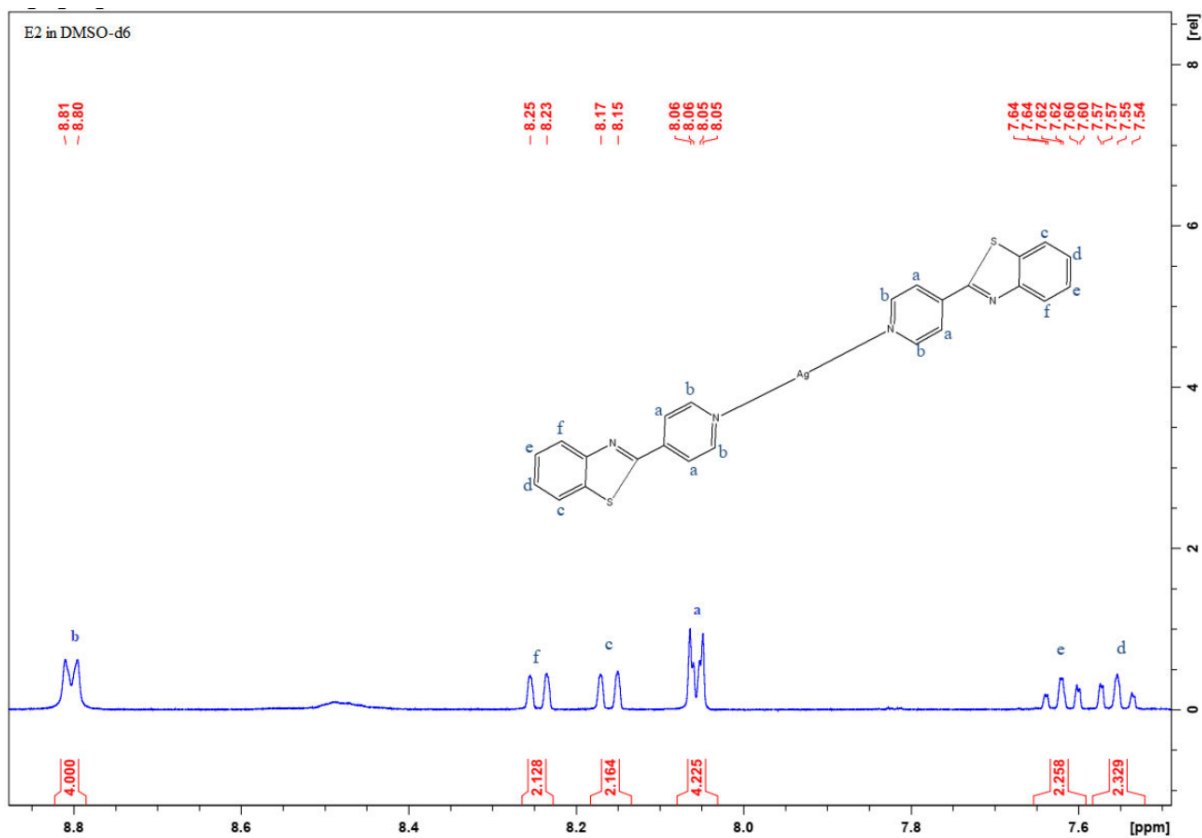

Figure S69:  $[Ag(E_b)_2]NO_3$  2

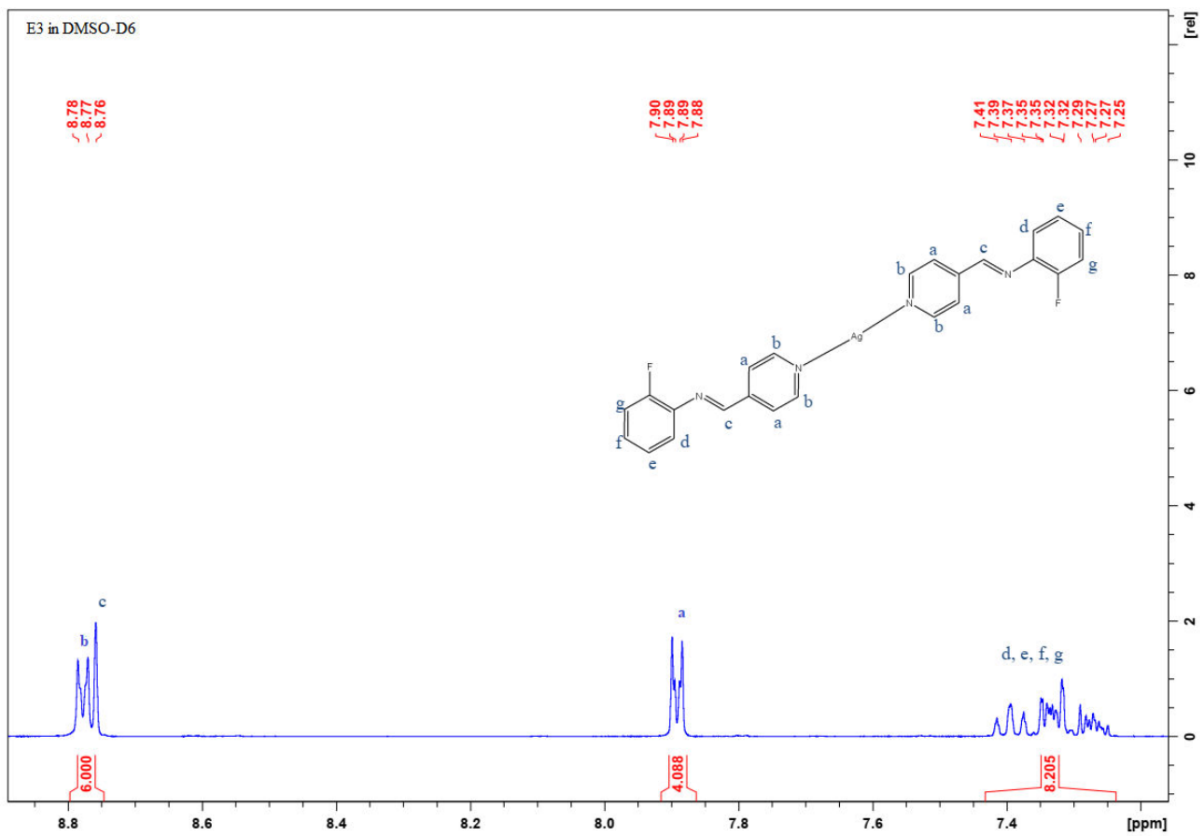

Figure S70:  $[\text{Ag}(\text{E}_c)_2]\text{NO}_3$  3

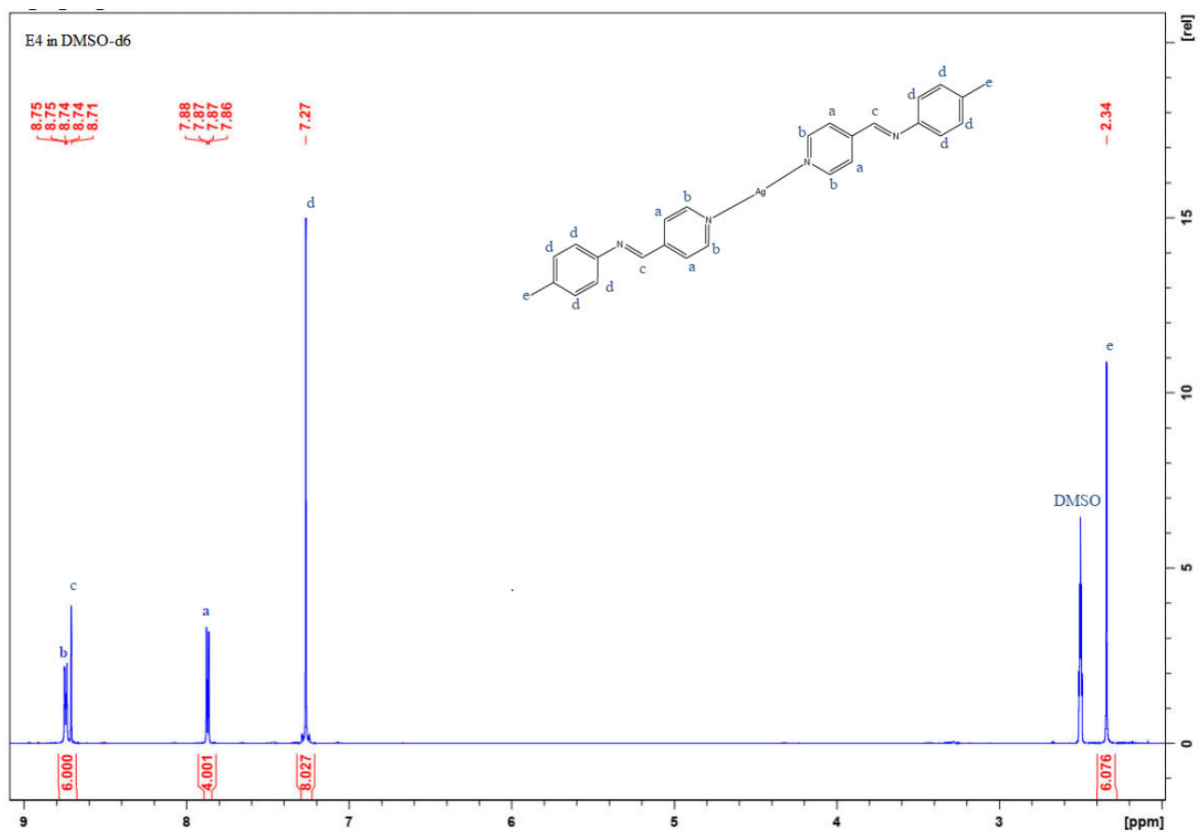

Figure S71:  $[\text{Ag}(\text{E}_d)_2]\text{NO}_3$  4

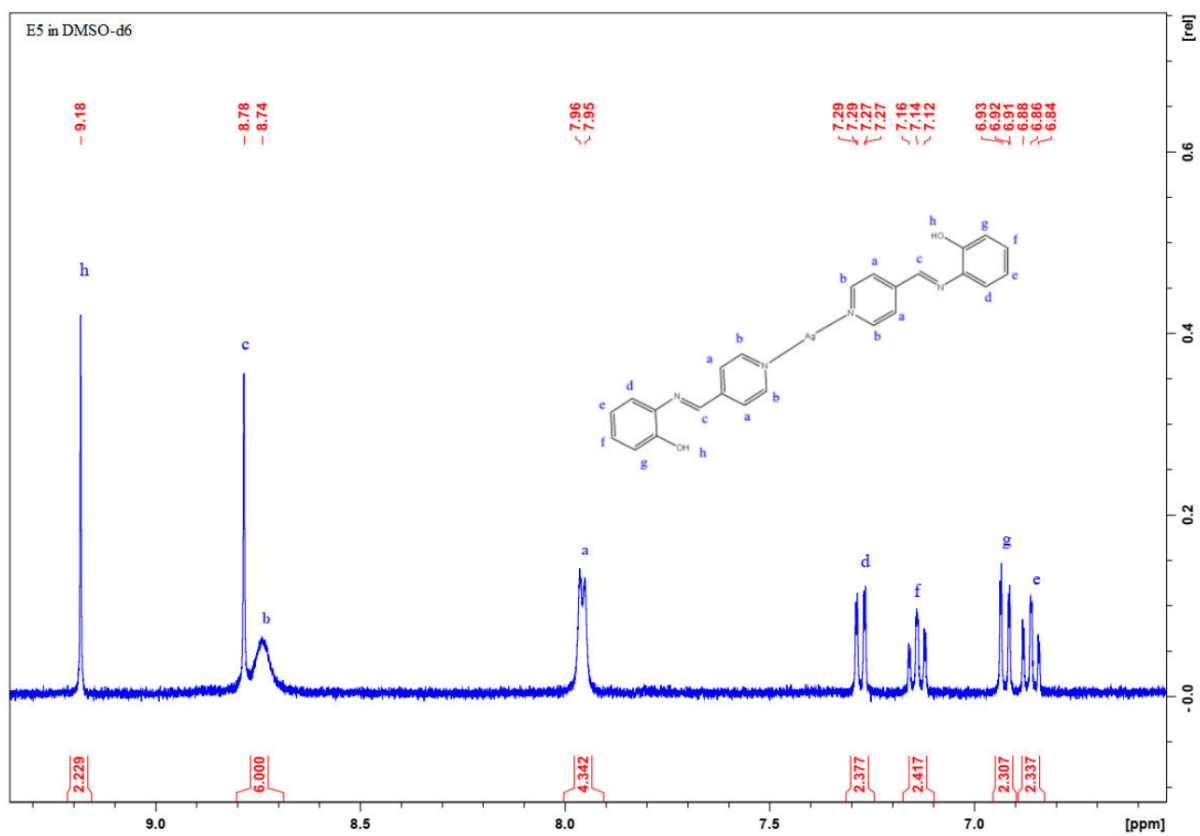

Figure S72:  $[\text{Ag}(\text{E}_a)_2]\text{ClO}_4$  5

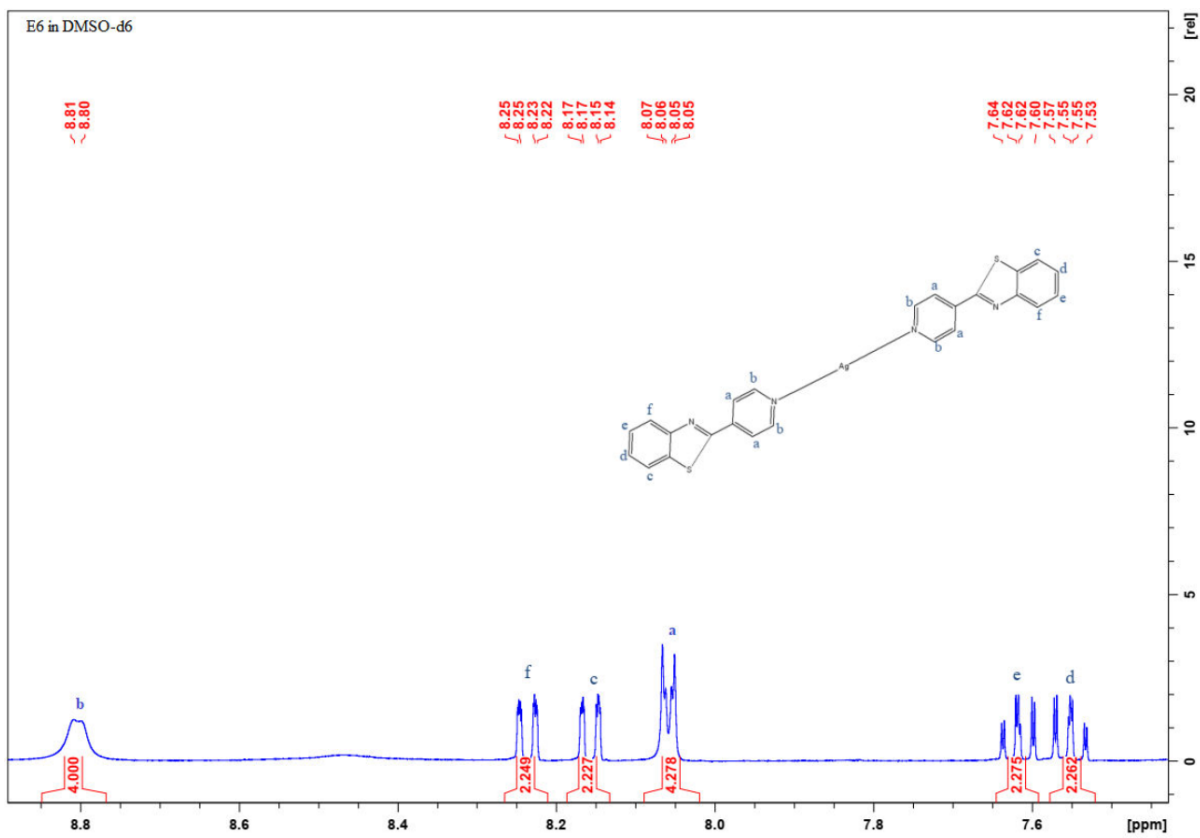

Figure S73:  $[\text{Ag}(\text{E}_b)_2]\text{ClO}_4$  6

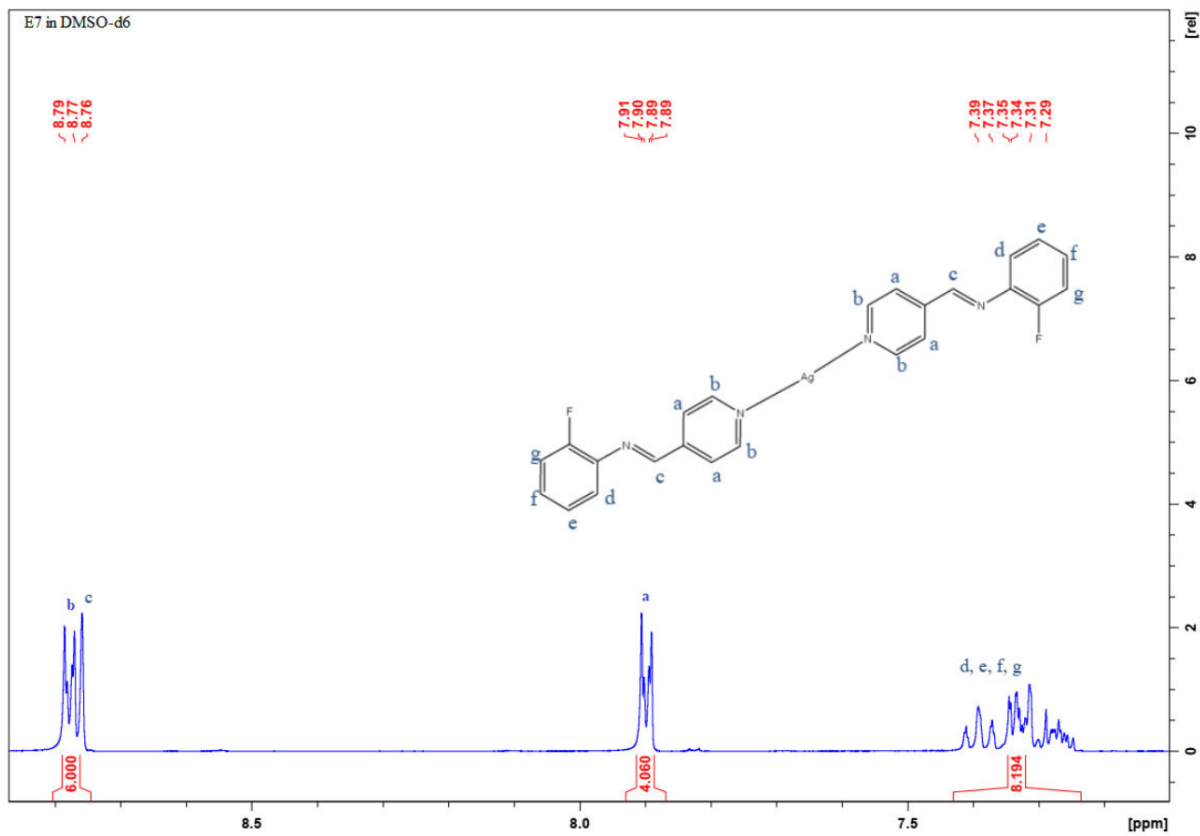

Figure S74:  $[\text{Ag}(\text{E}_7)_2]\text{ClO}_4$  7

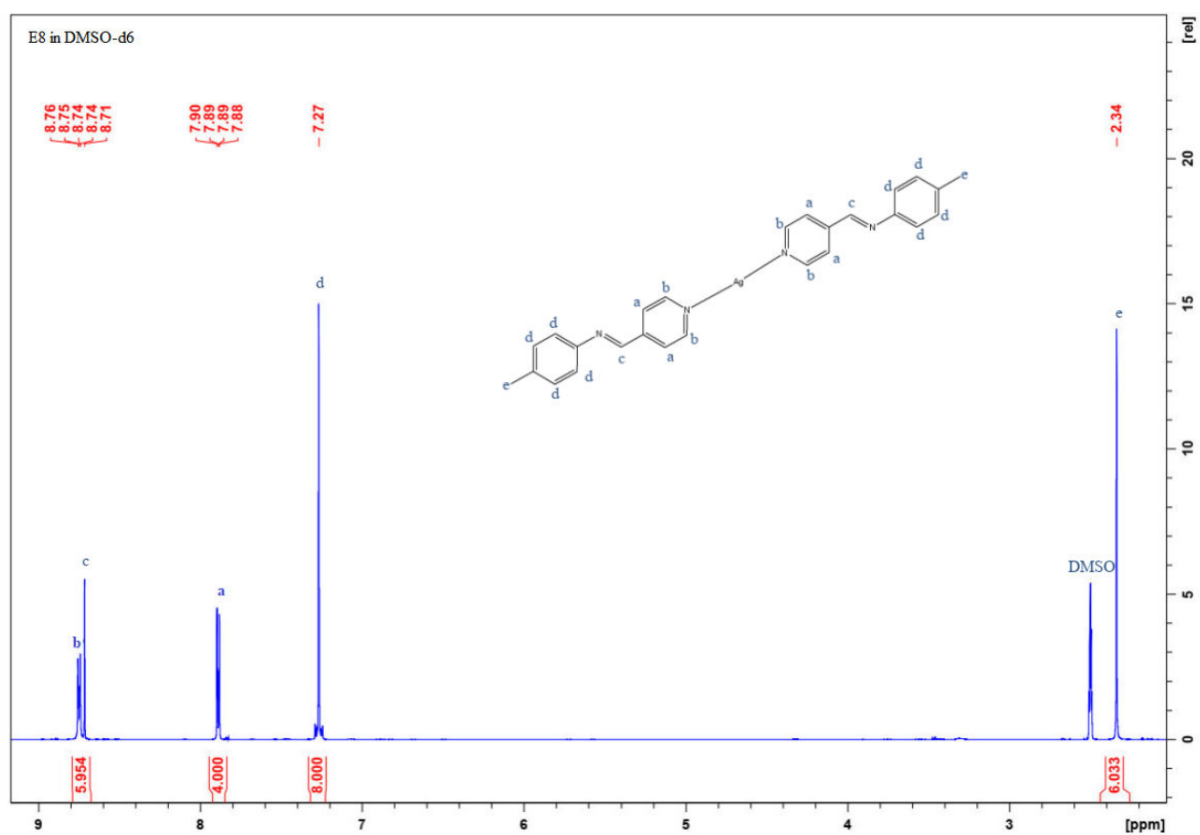

Figure S75:  $[\text{Ag}(\text{E}_8)_2]\text{ClO}_4$  8

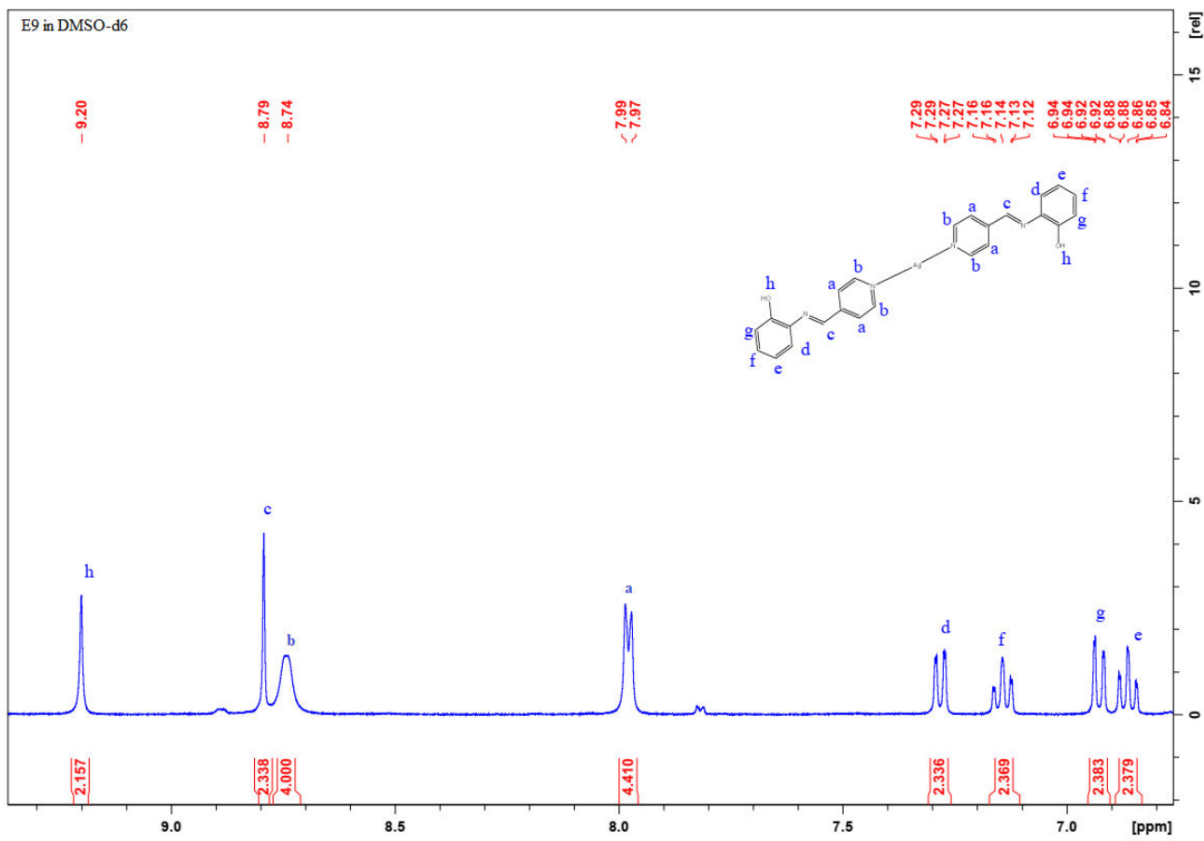

Figure S76:  $[\text{Ag}(\text{E}_a)_2]\text{CF}_3\text{SO}_3$  9

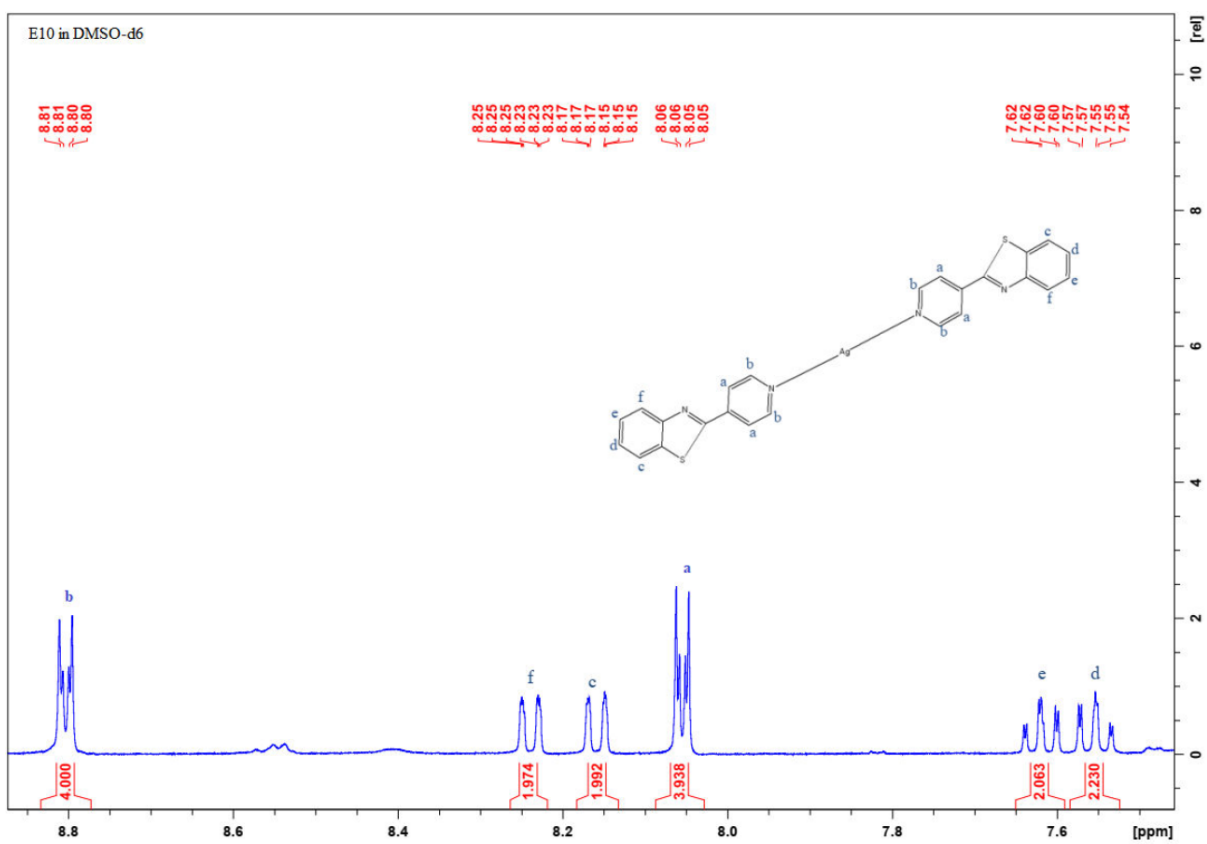

Figure S77:  $[\text{Ag}(\text{E}_b)_2]\text{CF}_3\text{SO}_3$  10



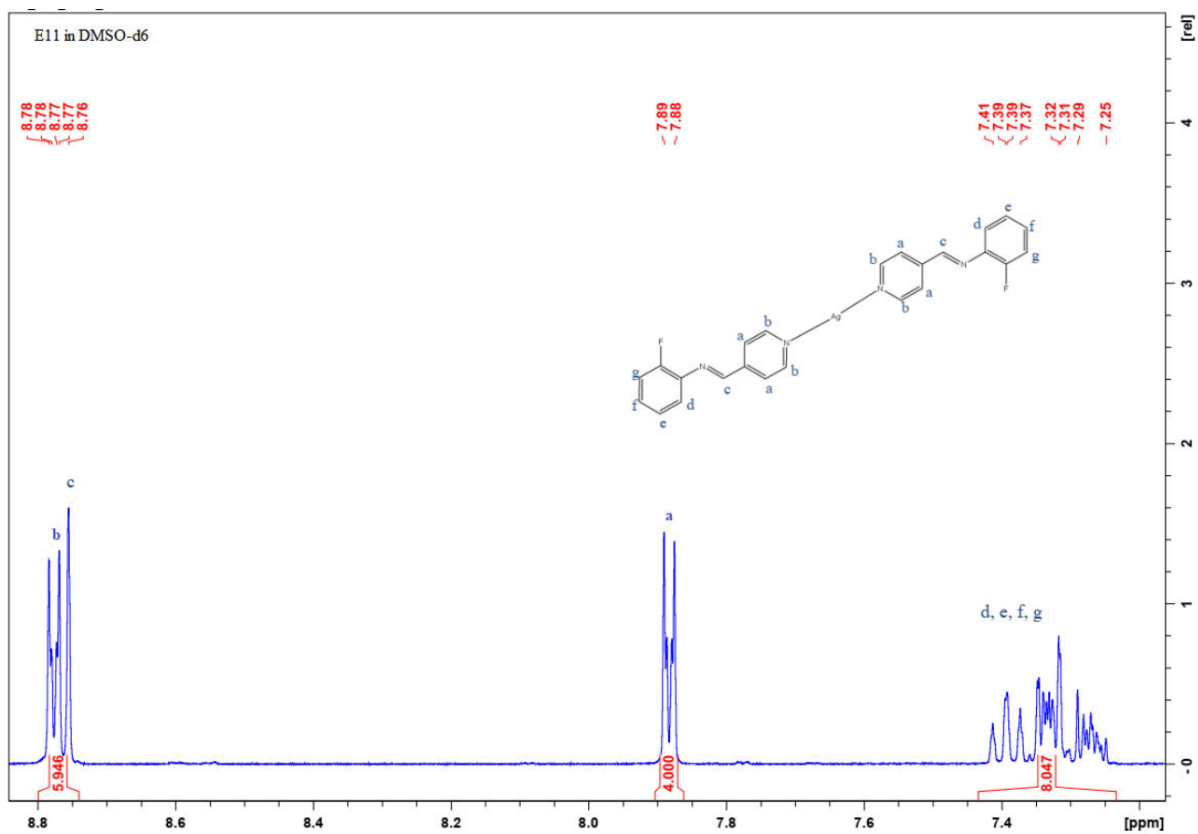

Figure S78:  $[Ag(Ec)_2]CF_3SO_3$

11

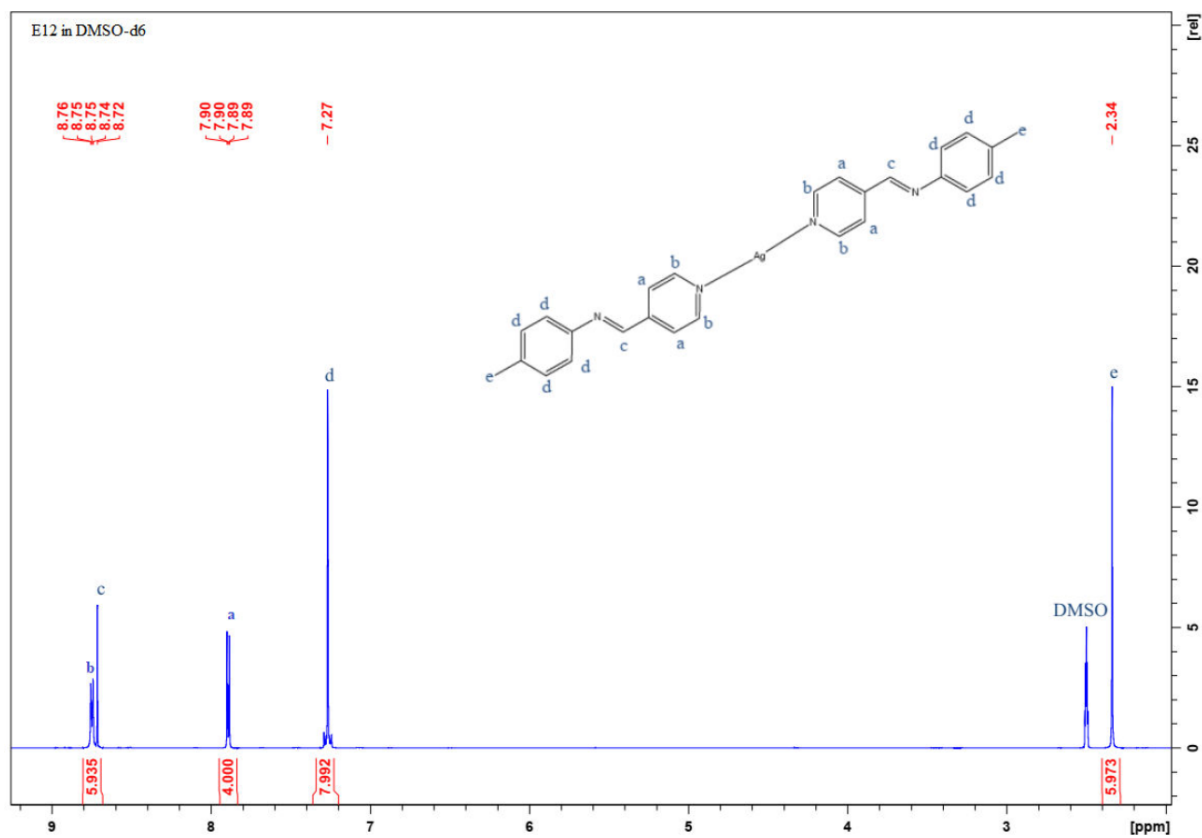

Figure S79:  $[Ag(Ed)_2]CF_3SO_3$

12

$^1\text{H}$  NMR spectra of the complexes 1, 6, 7 and 12 between 0-48 h

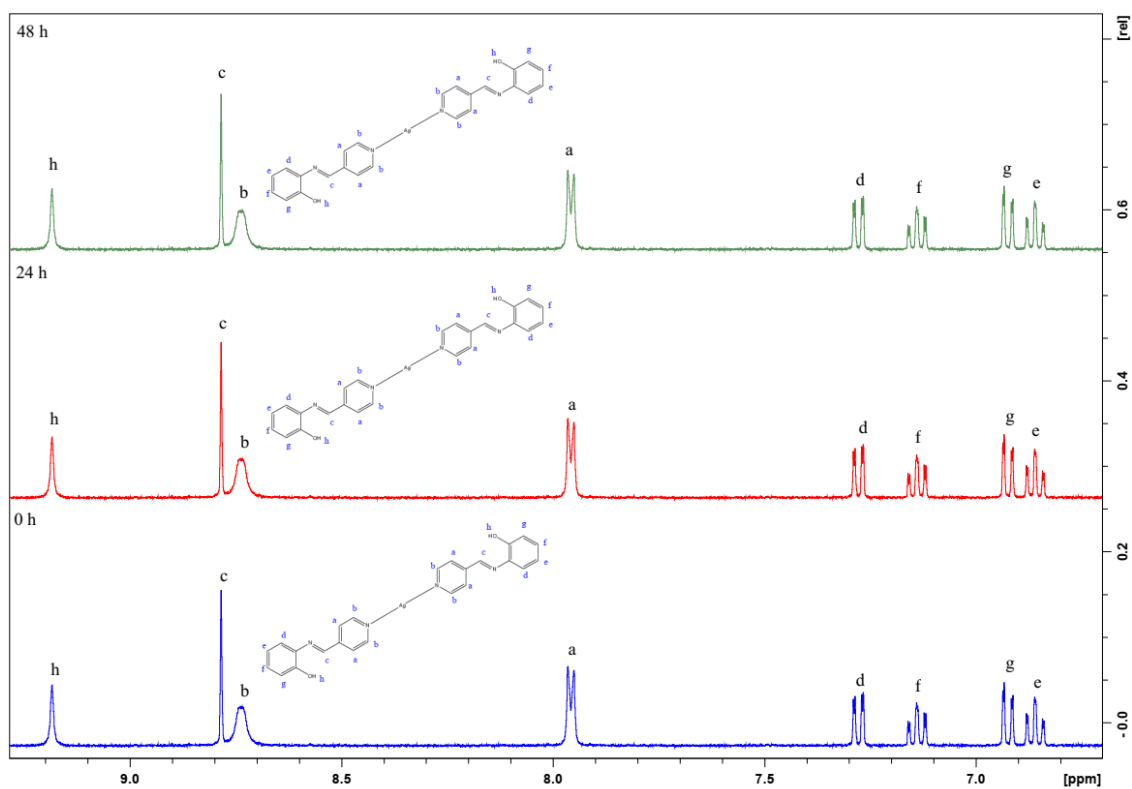

Figure S80: Time dependent  $^1\text{H}$  NMR spectra of  $[\text{Ag}(\text{E}_a)_2]\text{NO}_3$  1

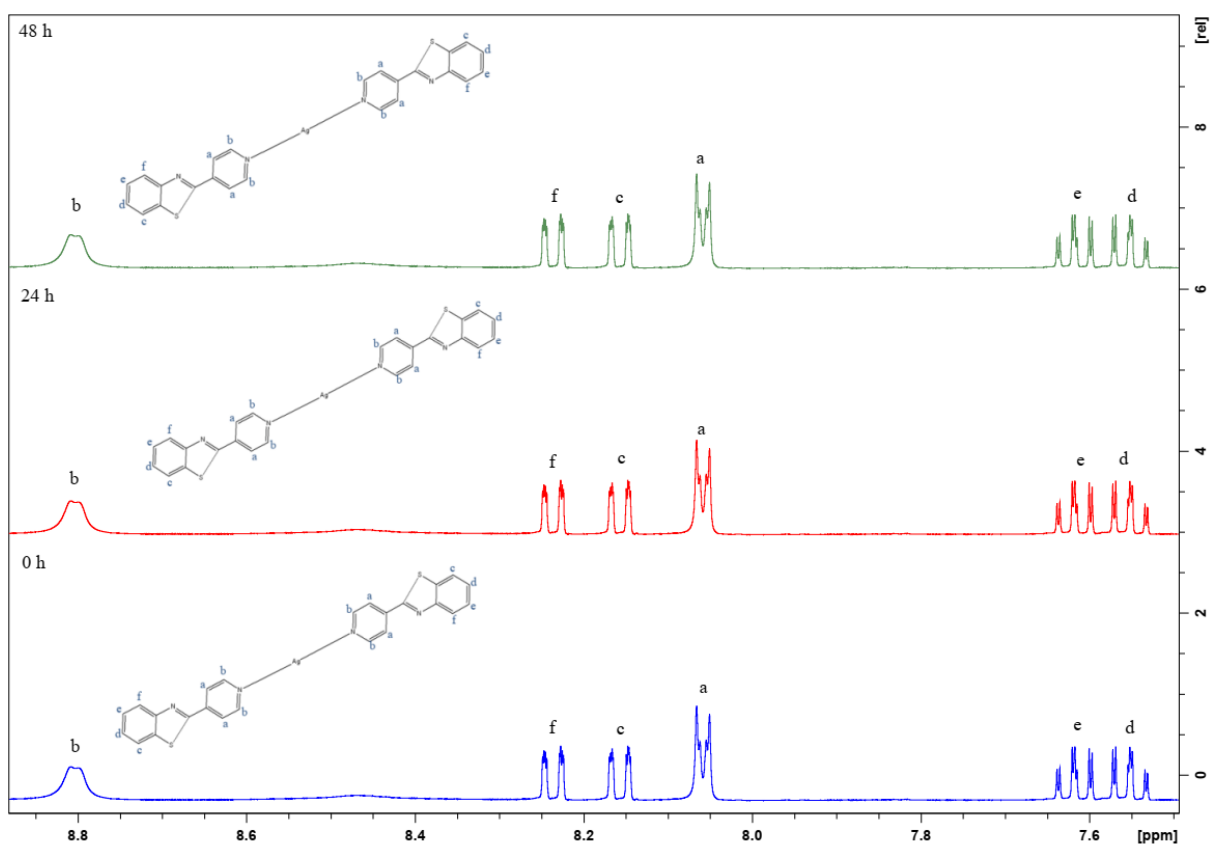

Figure S81: Time dependent  $^1\text{H}$  NMR spectra of  $[\text{Ag}(\text{E}_b)_2]\text{ClO}_4$  6

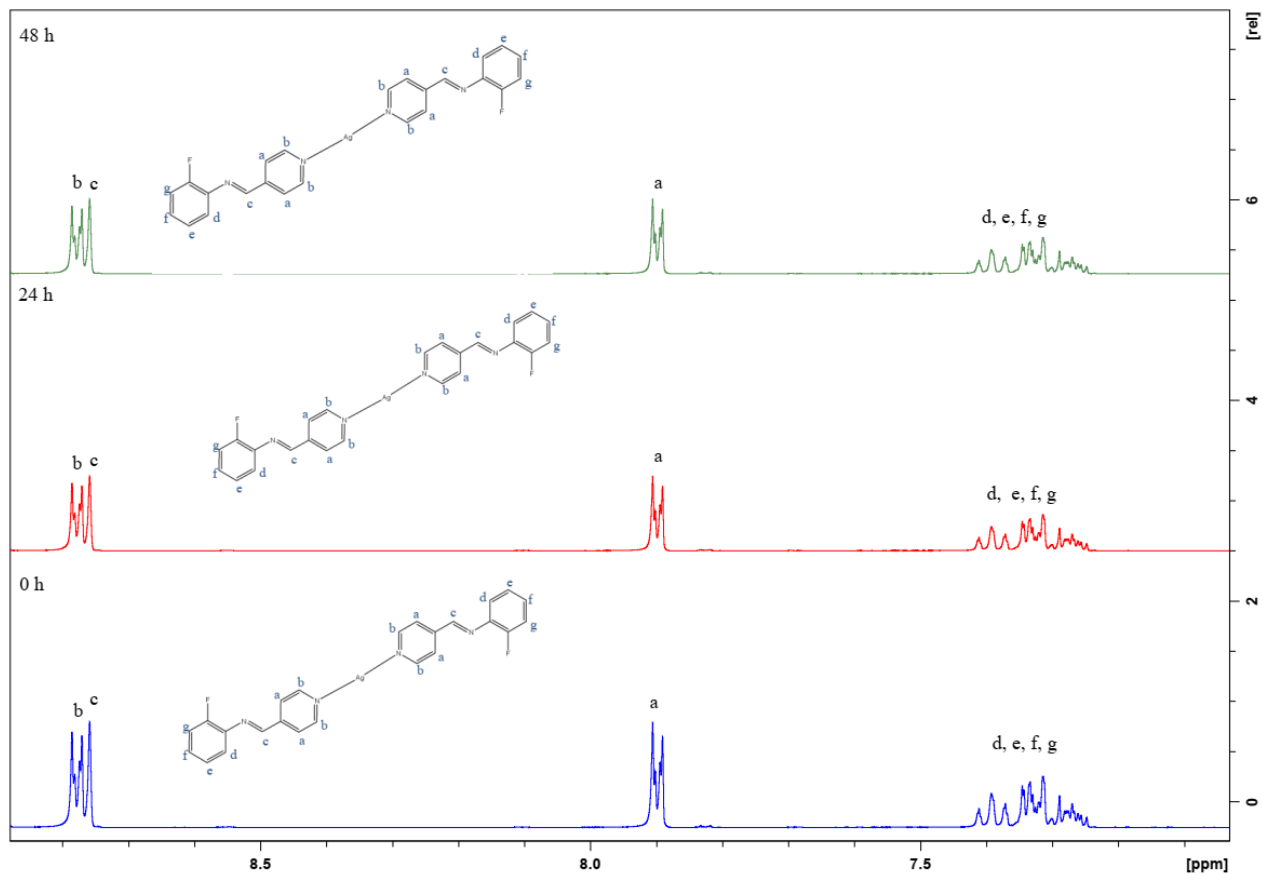

Figure S82: Time dependent  $^1\text{H}$  NMR spectra of  $[\text{Ag}(\text{E}_c)_2]\text{ClO}_4$  7

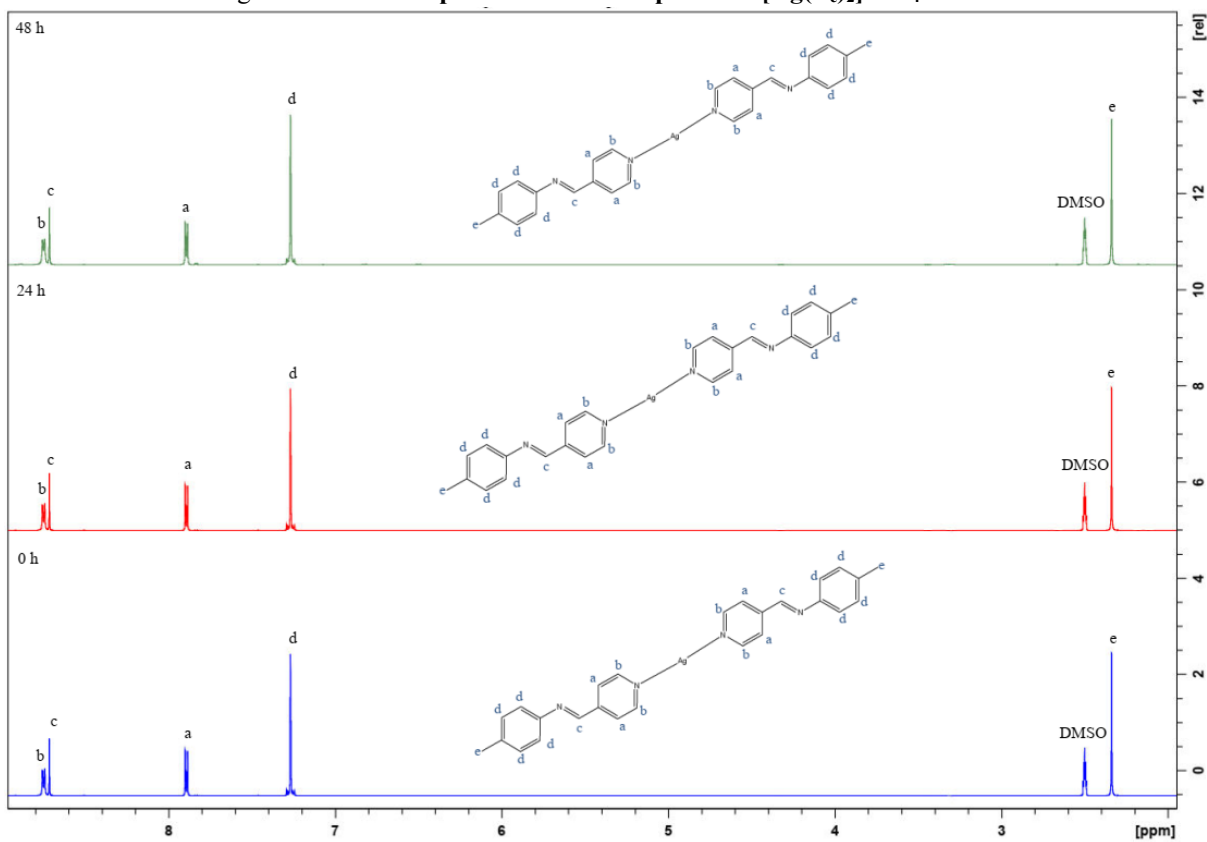

Figure S83: Time dependent  $^1\text{H}$  NMR spectra of  $[\text{Ag}(\text{E}_a)_2]\text{CF}_3\text{SO}_3$  12

<sup>15</sup>N-NMR SPECTRA OF E<sub>a-d</sub>

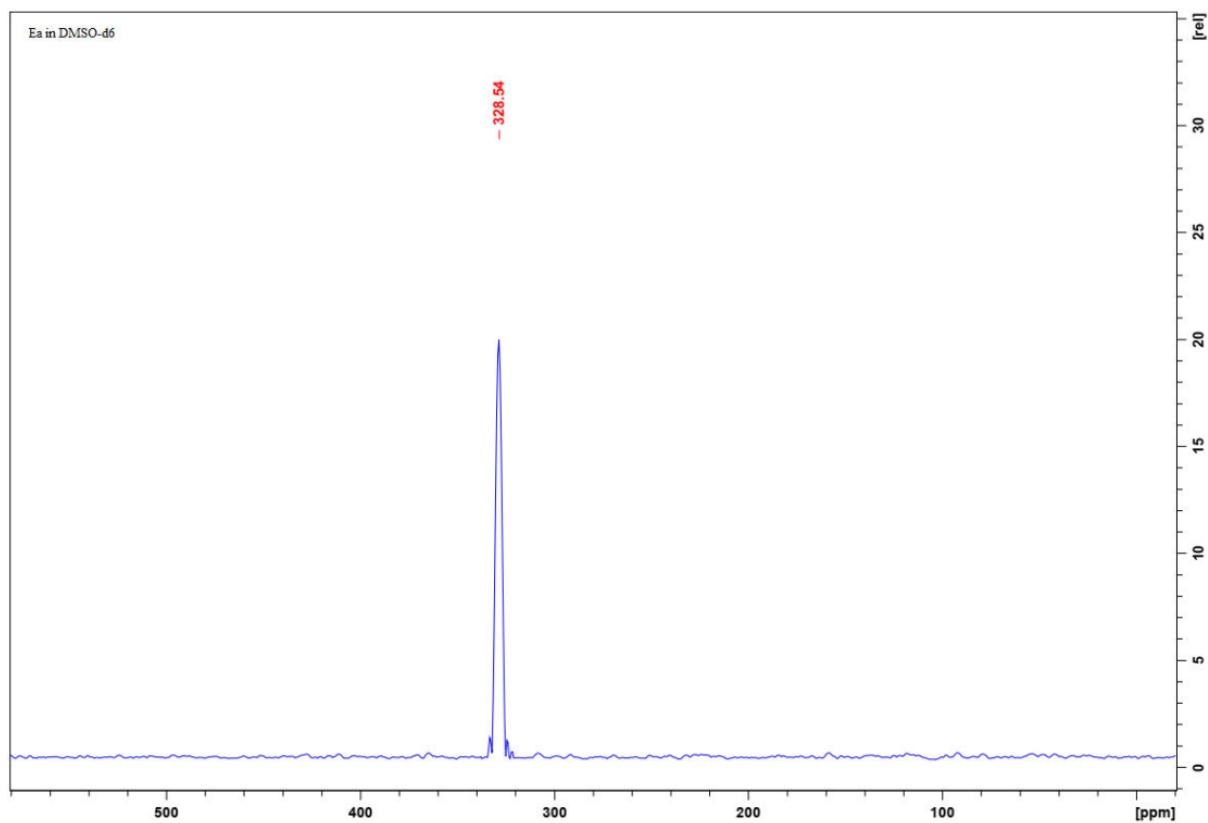

Figure S84: <sup>15</sup>N NMR spectrum of E)-2-((pyridin-4-ylmethylene)amino)phenol E<sub>a</sub>

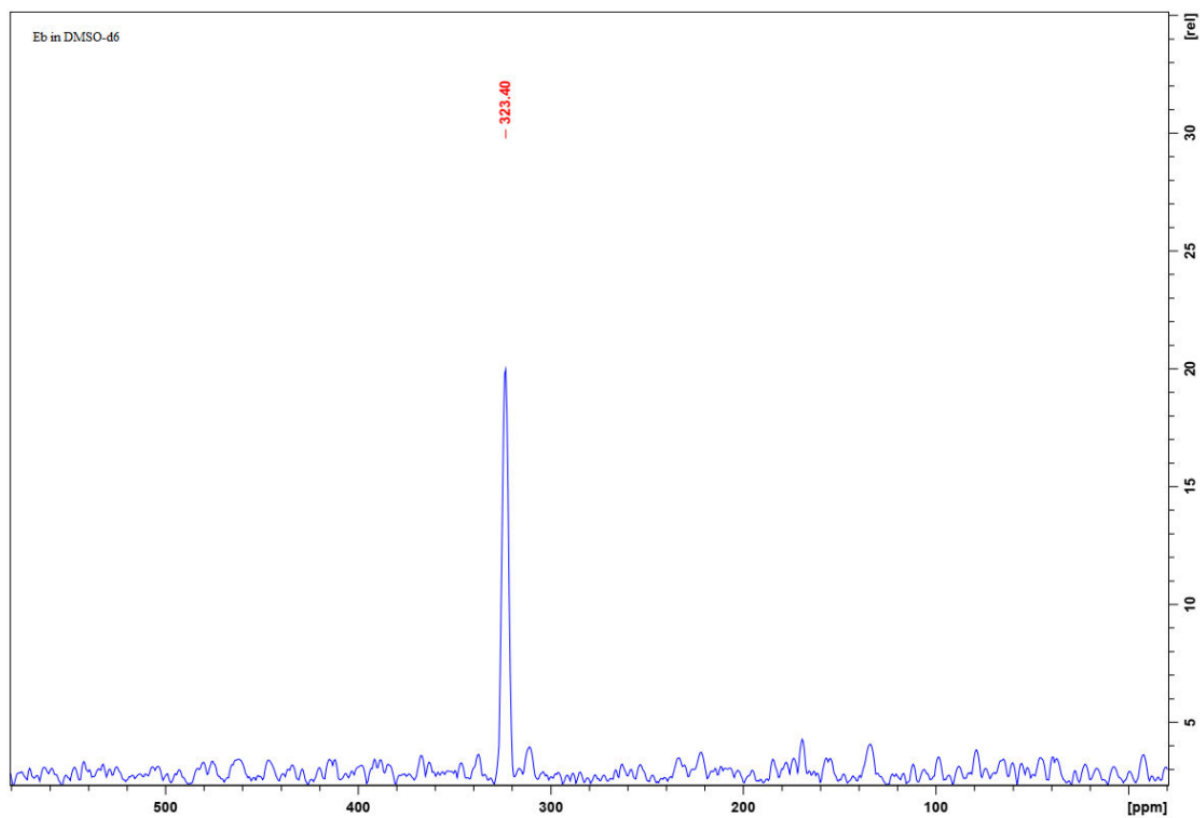

Figure S85:  $^{15}\text{N}$  NMR spectrum of 2-(pyridin-4-yl)benzo[*d*]thiazole  $E_b$

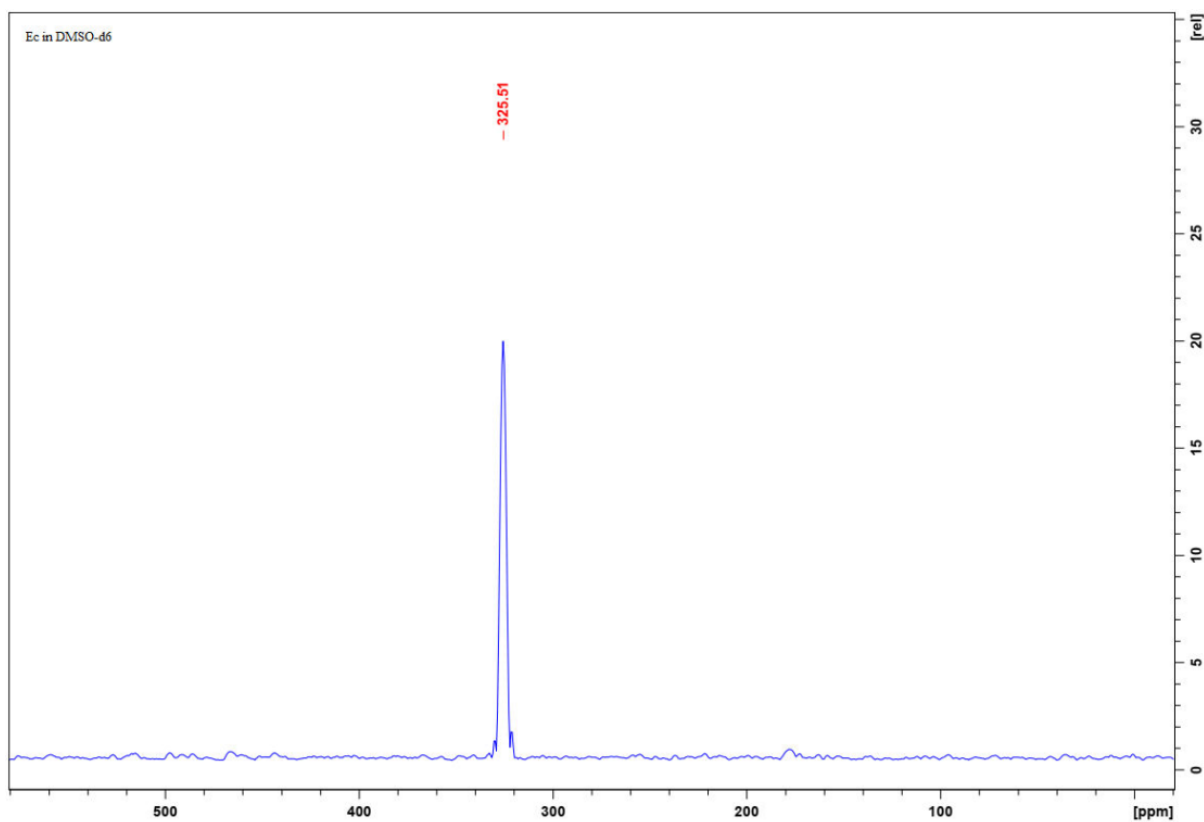

Figure S86:  $^{15}\text{N}$  NMR spectrum of (E)-N-(2-fluorophenyl)-1-(pyridin-4-yl)methanimine  $E_c$

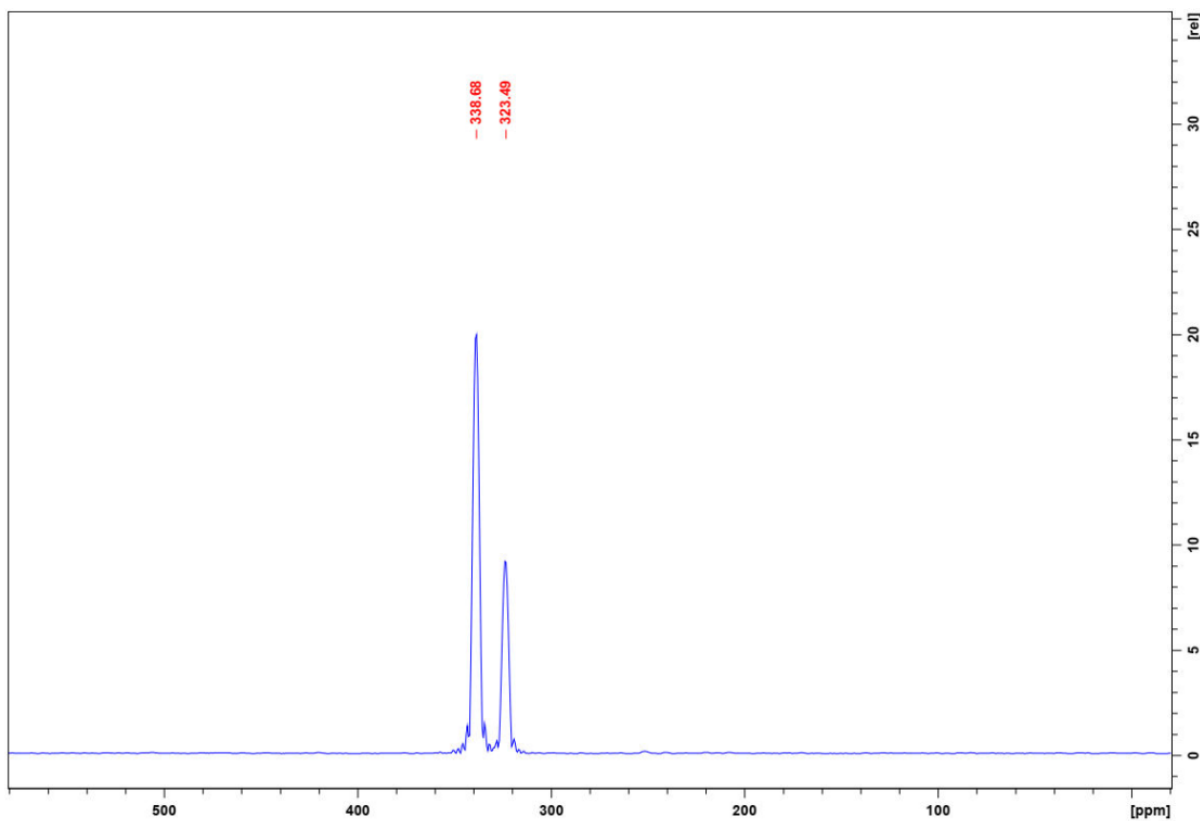

Figure S87:  $^{15}\text{N}$  NMR spectrum of (E)-1-(pyridin-4-yl)-N-(p-tolyl)methanimine  $\text{E}_d$

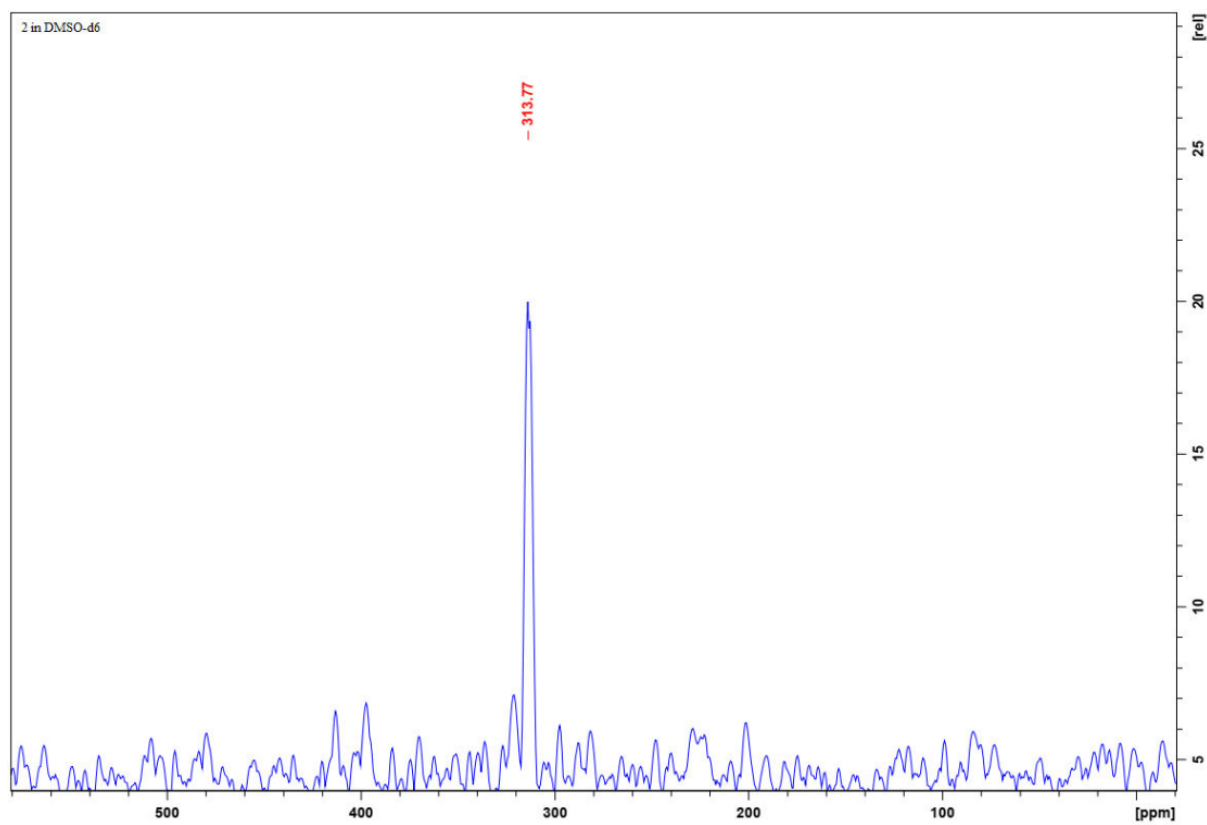

Figure S88:  $^{15}\text{N}$  NMR spectrum of  $[\text{Ag}(\text{E}_b)_2]\text{NO}_3$  2

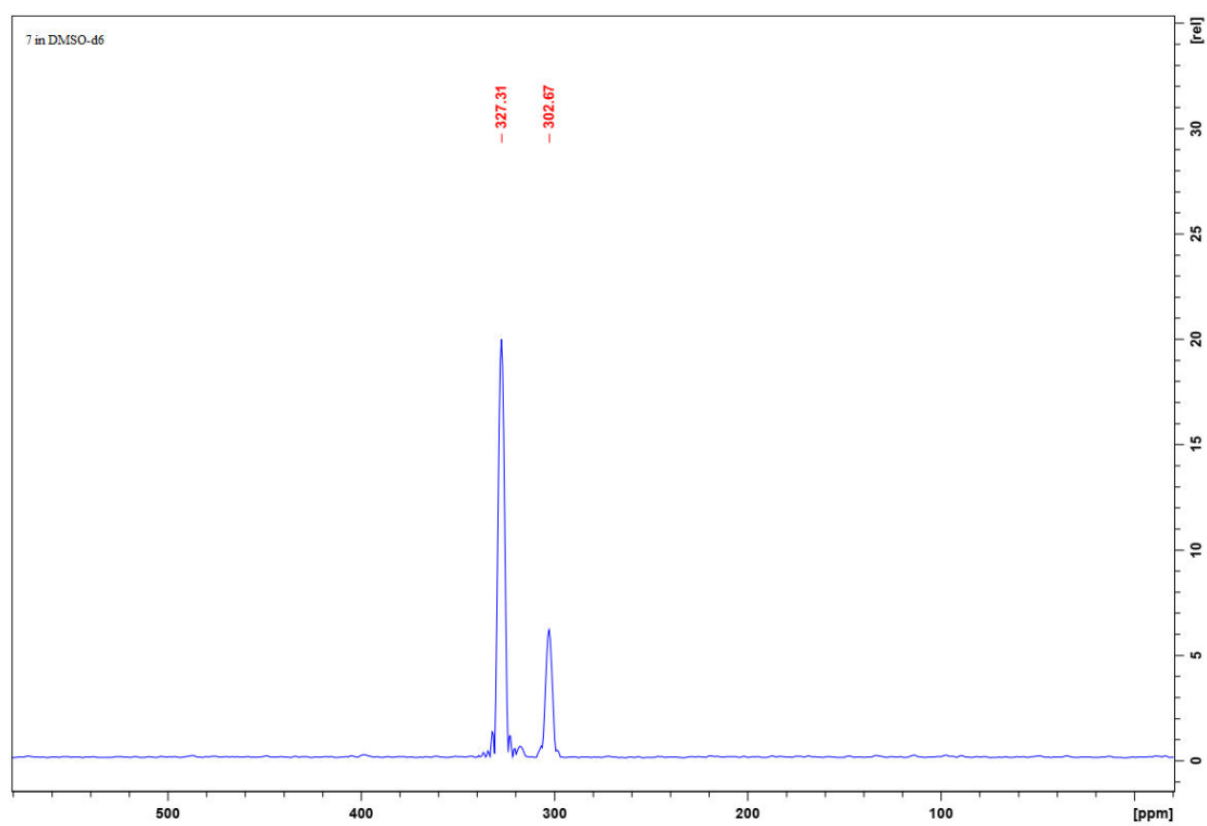

Figure S89:  $^{15}\text{N}$  NMR spectrum of  $[\text{Ag}(\text{E}_c)_2]\text{ClO}_4$  7

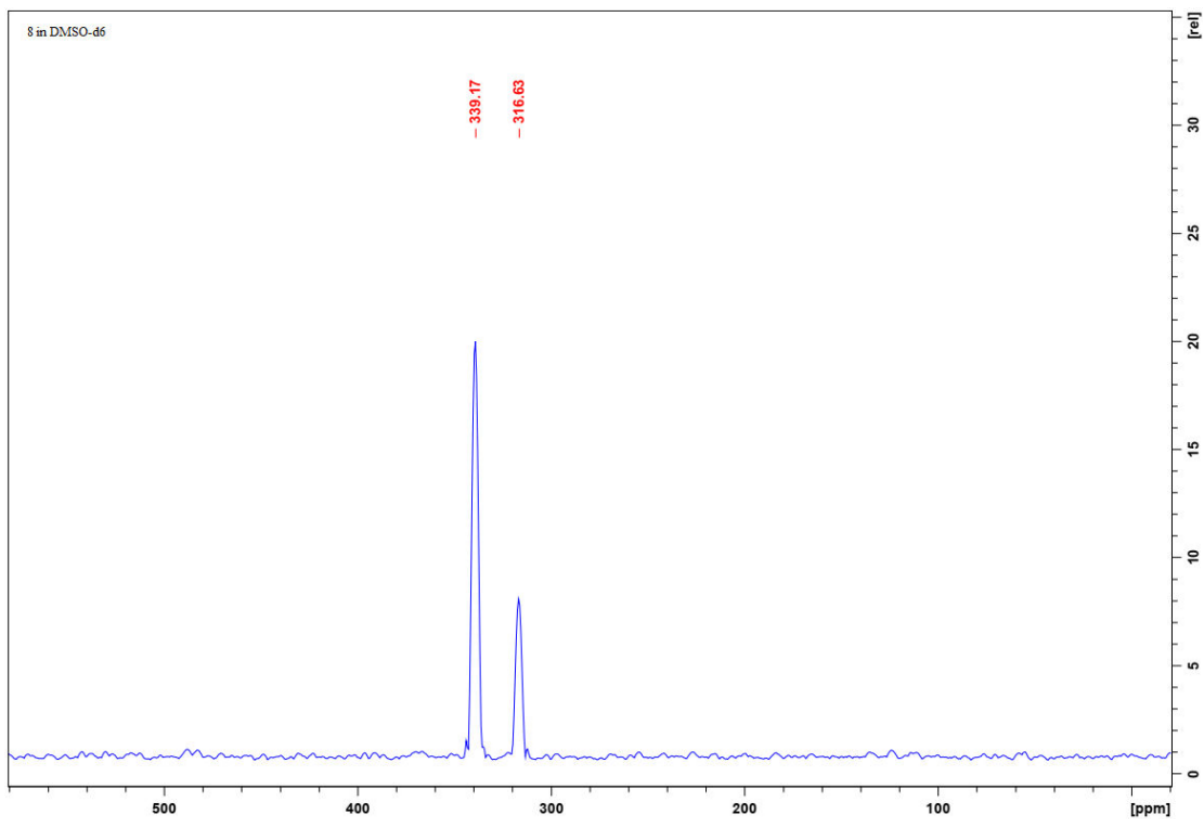

Figure S90:  $^{15}\text{N}$  NMR spectrum of  $[\text{Ag}(\text{E}_d)_2]\text{ClO}_4$  8

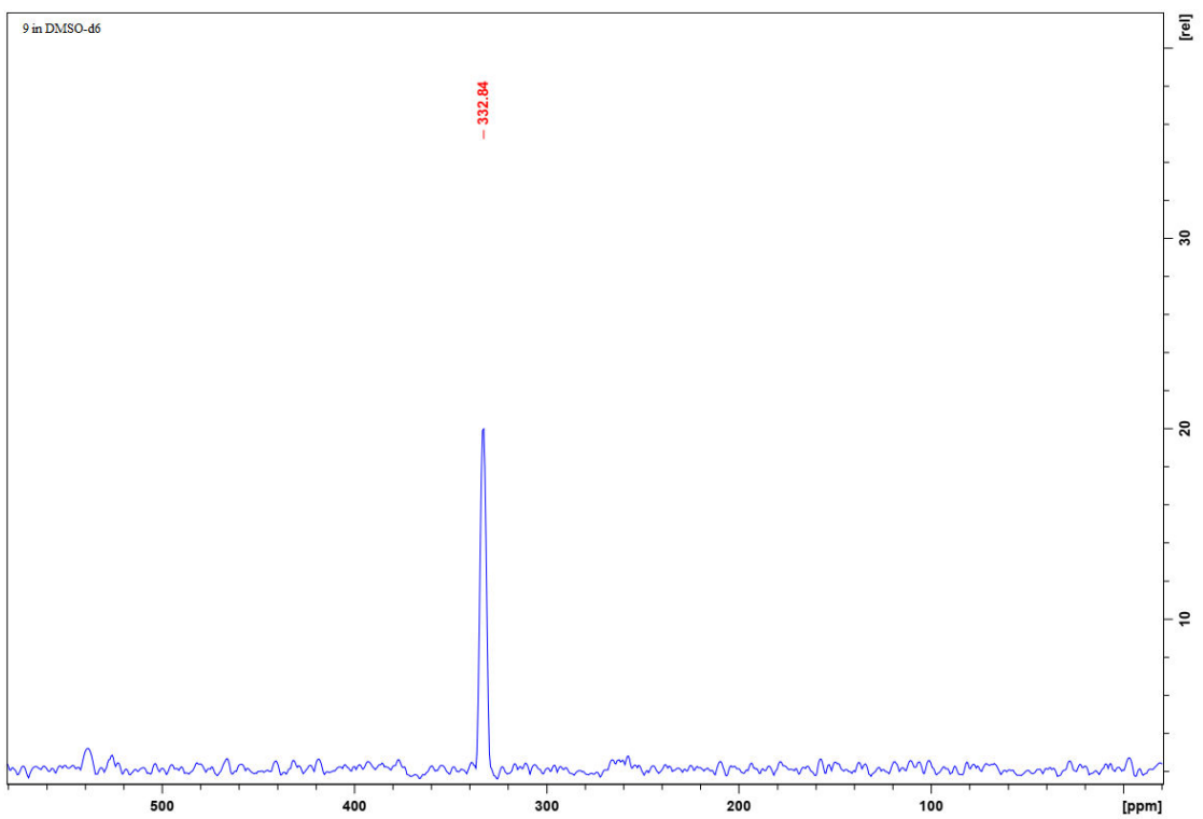

Figure S91:  $^{15}\text{N}$  NMR spectrum of  $[\text{Ag}(\text{E}_a)_2]\text{CF}_3\text{SO}_3$  9

### <sup>13</sup>C-NMR SPECTRA OF E<sub>a-d</sub>

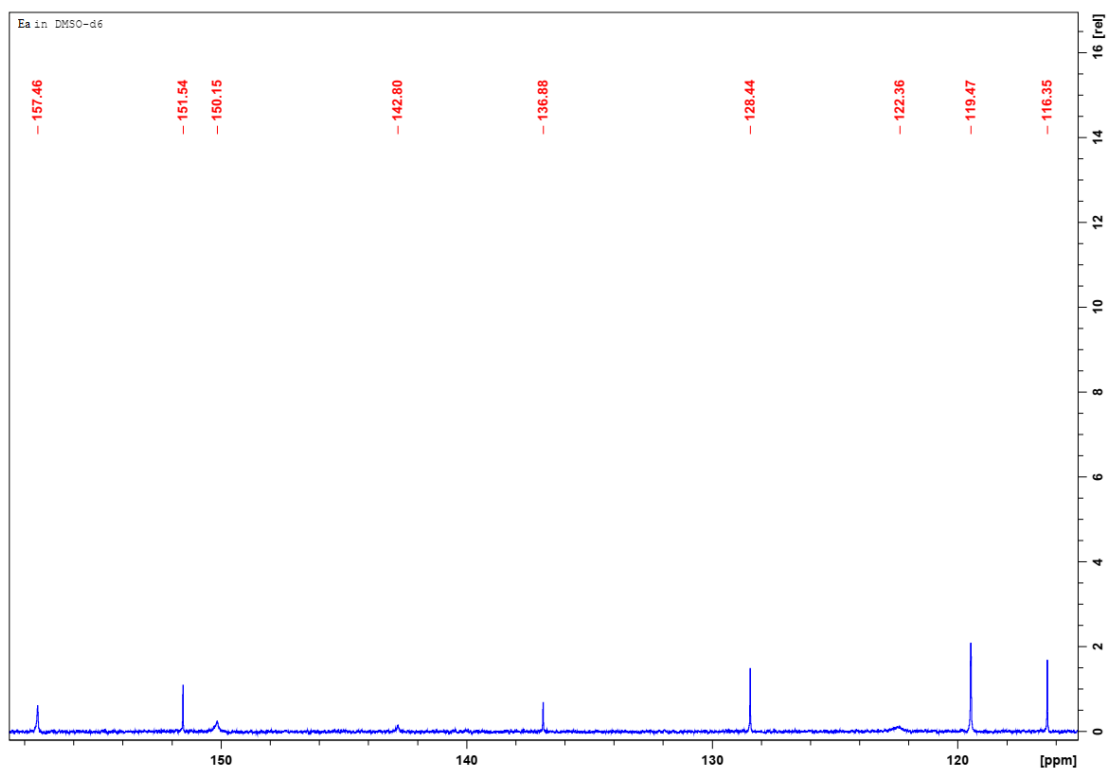

Figure S92: E)-2-((pyridin-4-ylmethylene)amino)phenol E<sub>a</sub>

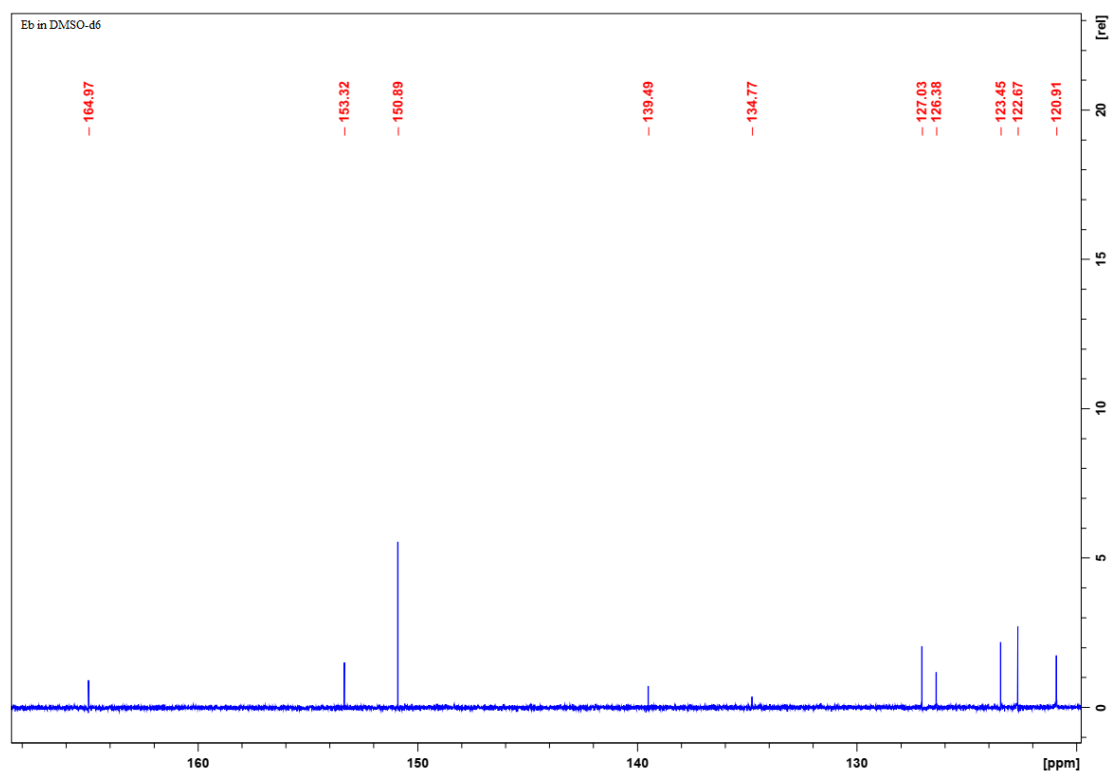

Figure S93: 2-(pyridin-4-yl)benzo[*d*]thiazole E<sub>b</sub>



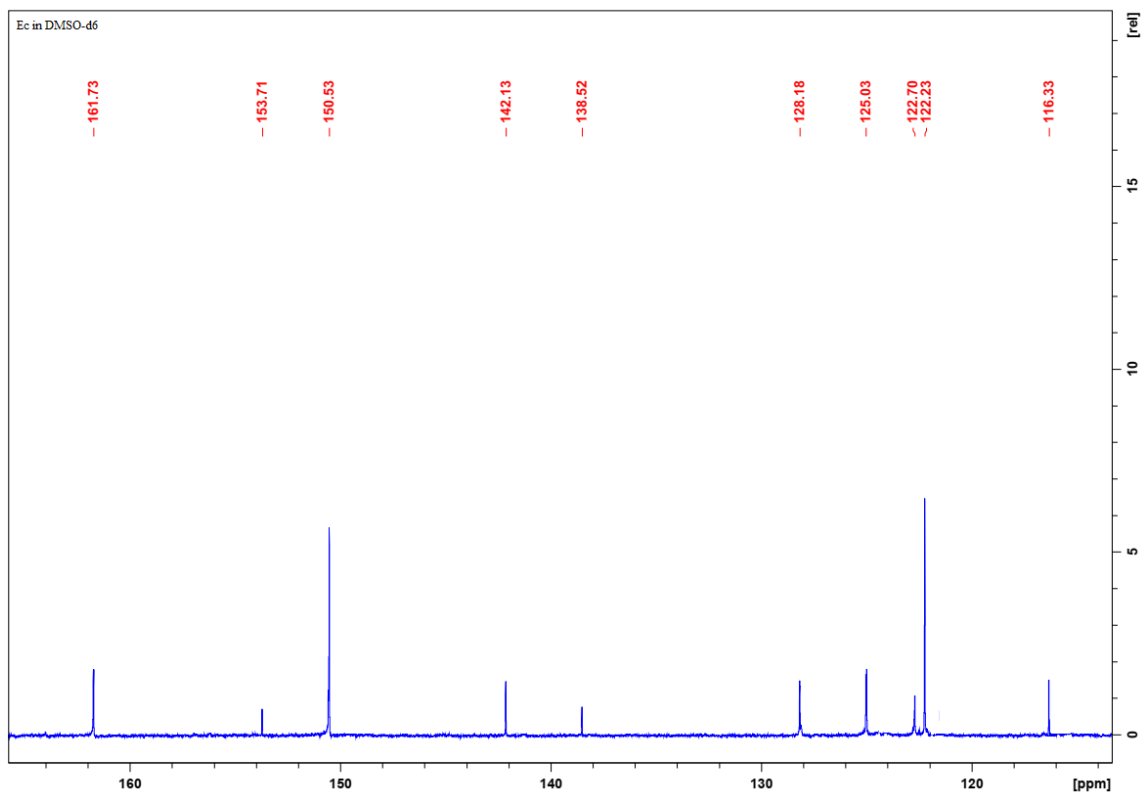

Figure S94: (E)-N-(2-fluorophenyl)-1-(pyridin-4-yl)methanimine E<sub>c</sub>

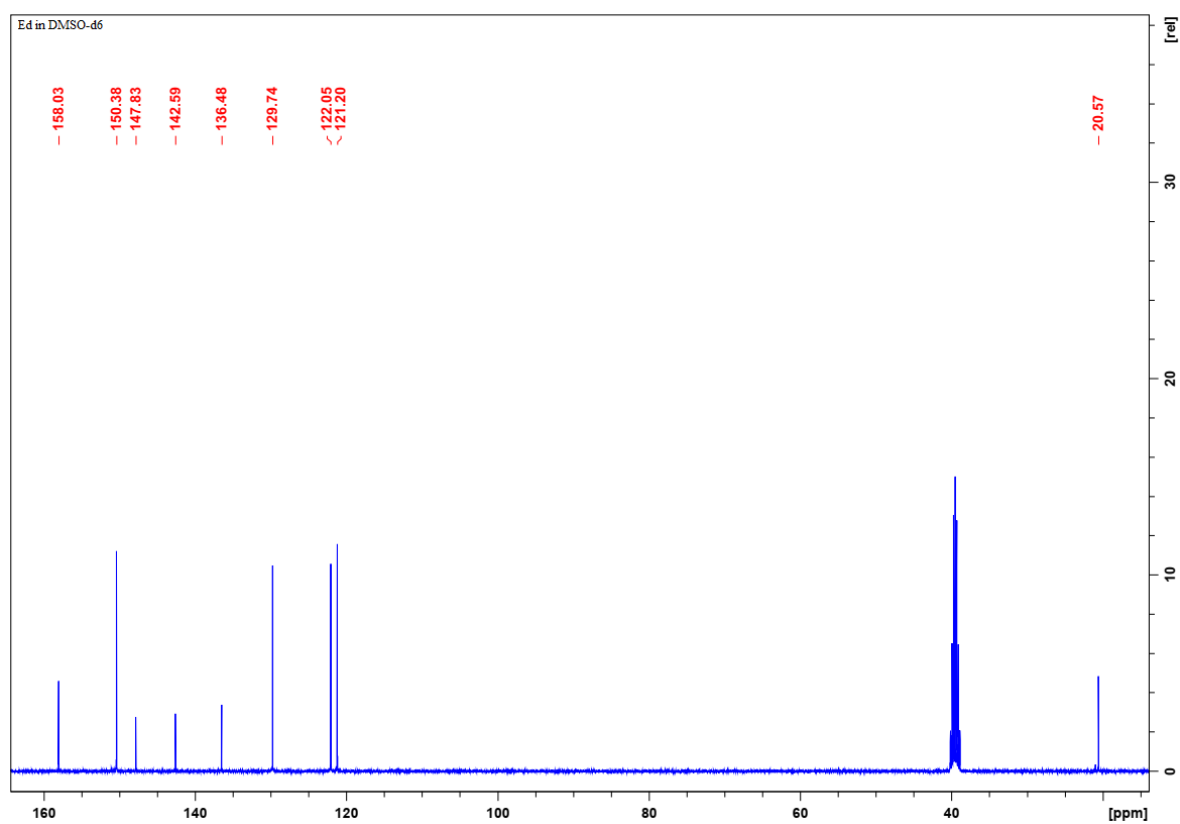

Figure S95: (E)-1-(pyridin-4-yl)-N-(p-tolyl)methanimine E<sub>d</sub>

# <sup>13</sup>C-NMR SPECTRA OF COMPLEXES 1-12

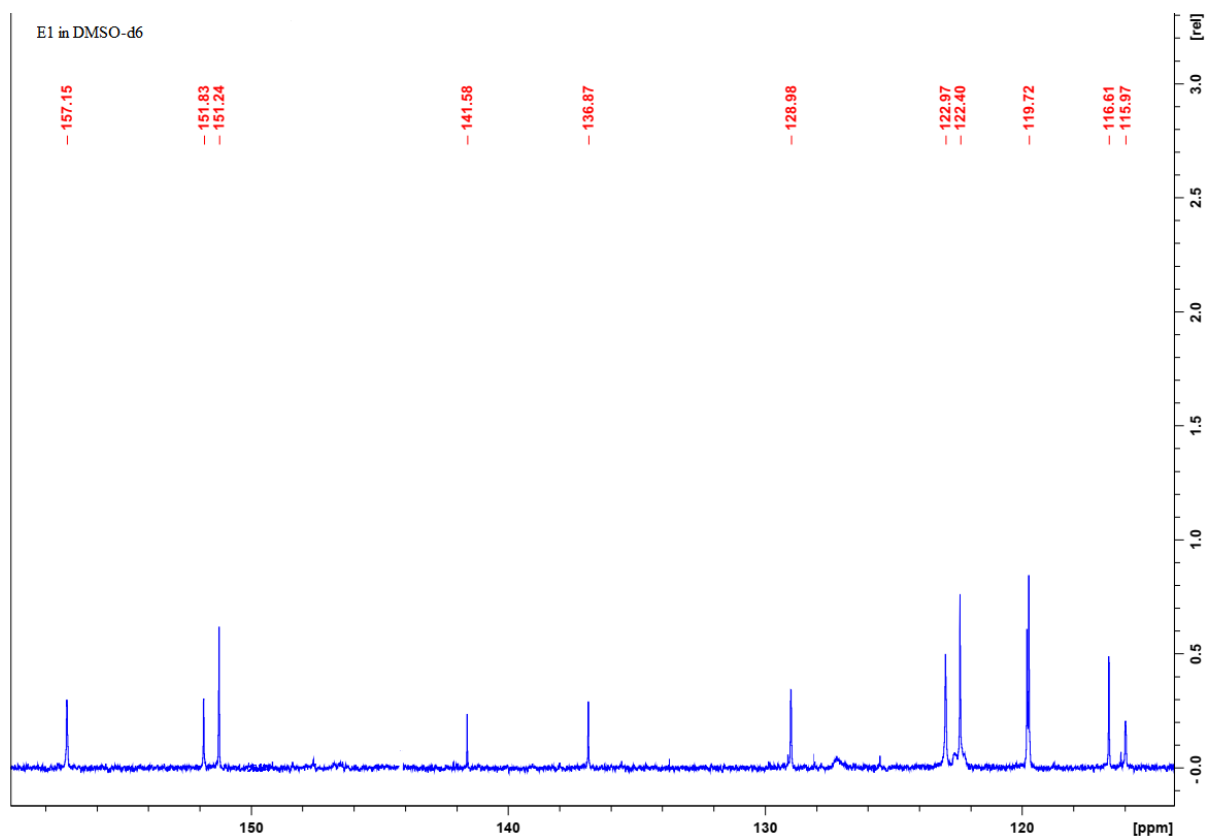

Figure S96: [Ag(E<sub>a</sub>)<sub>2</sub>]NO<sub>3</sub> 1

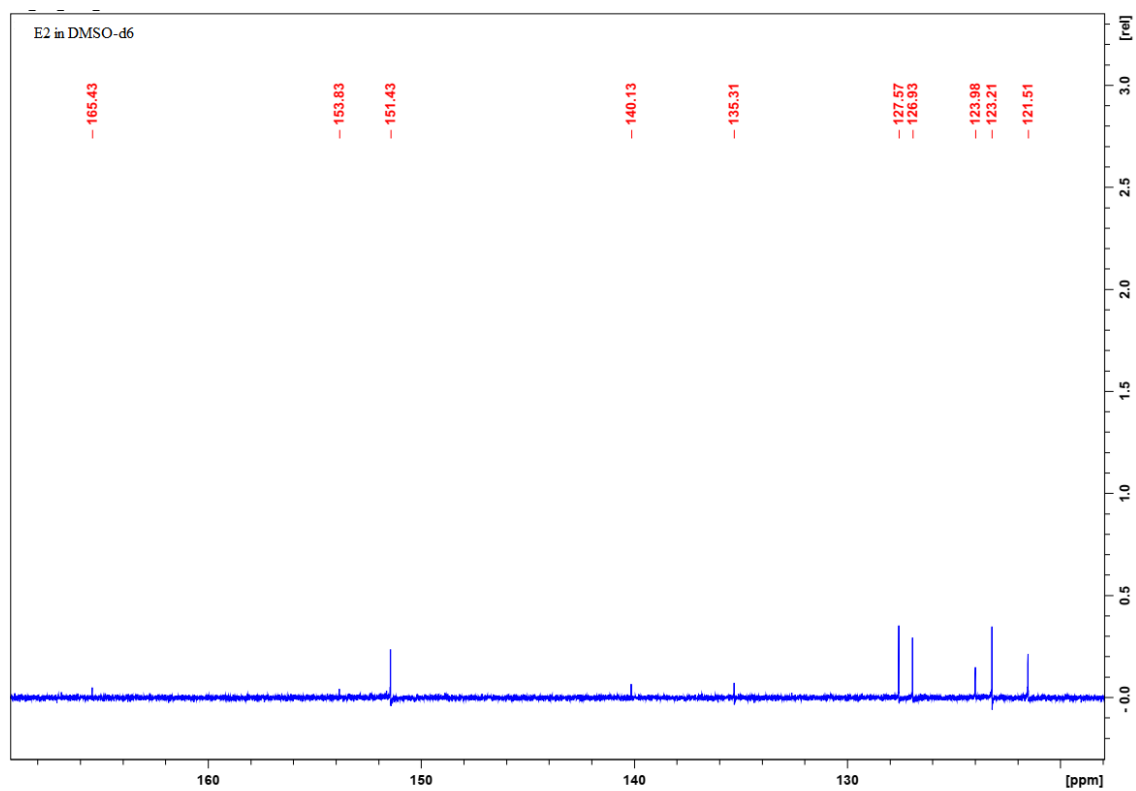

Figure S97: [Ag(E<sub>b</sub>)<sub>2</sub>]NO<sub>3</sub> 2

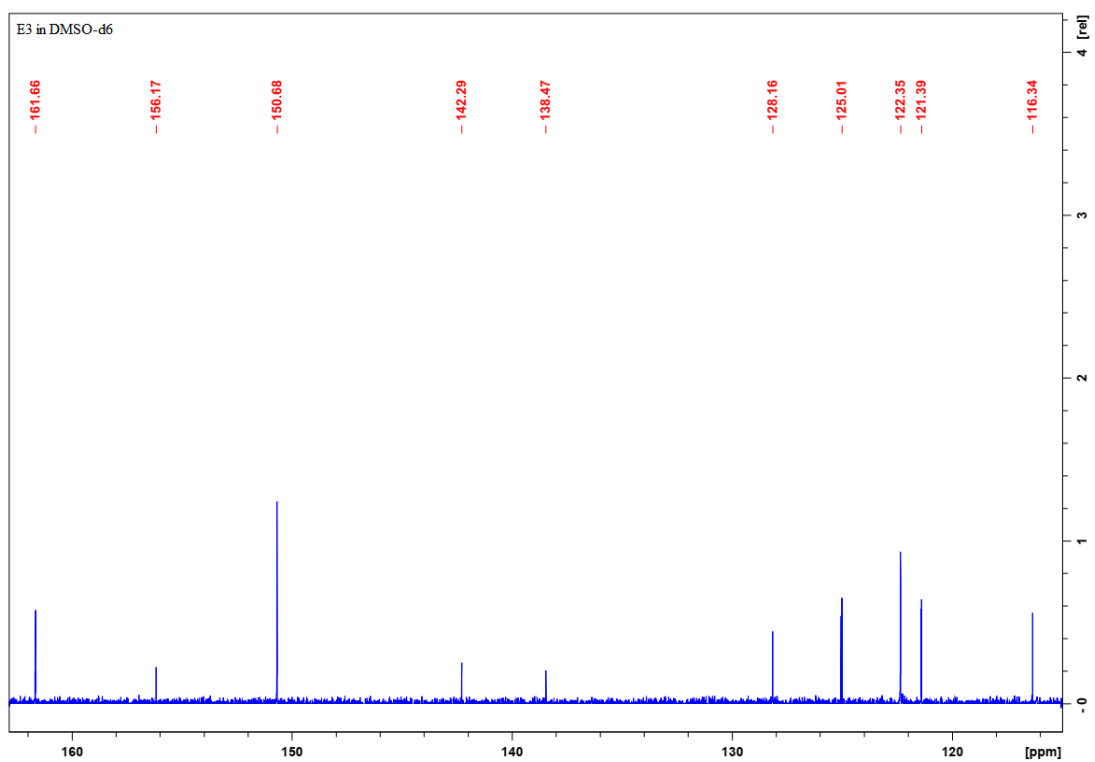

Figure S98:  $[\text{Ag}(\text{E}_c)_2]\text{NO}_3$  3

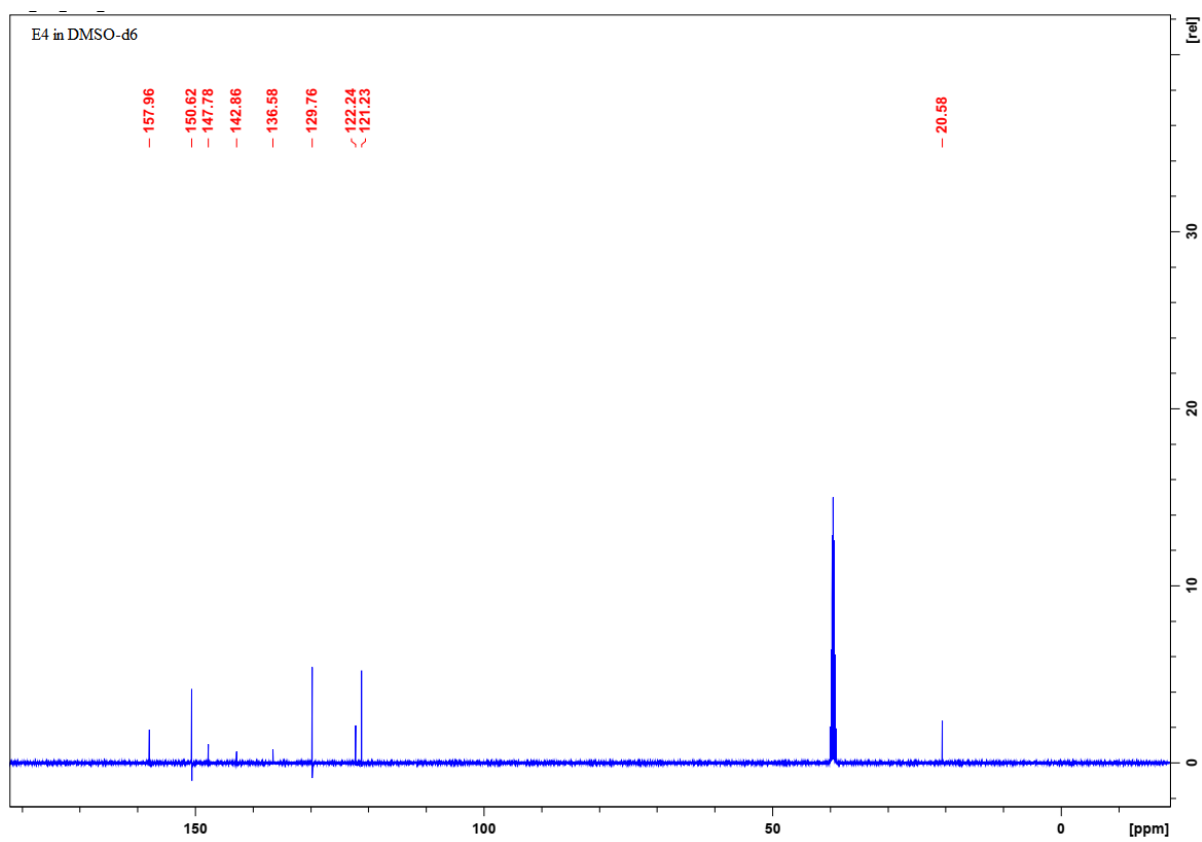

Figure S99:  $[\text{Ag}(\text{E}_d)_2]\text{NO}_3$  4

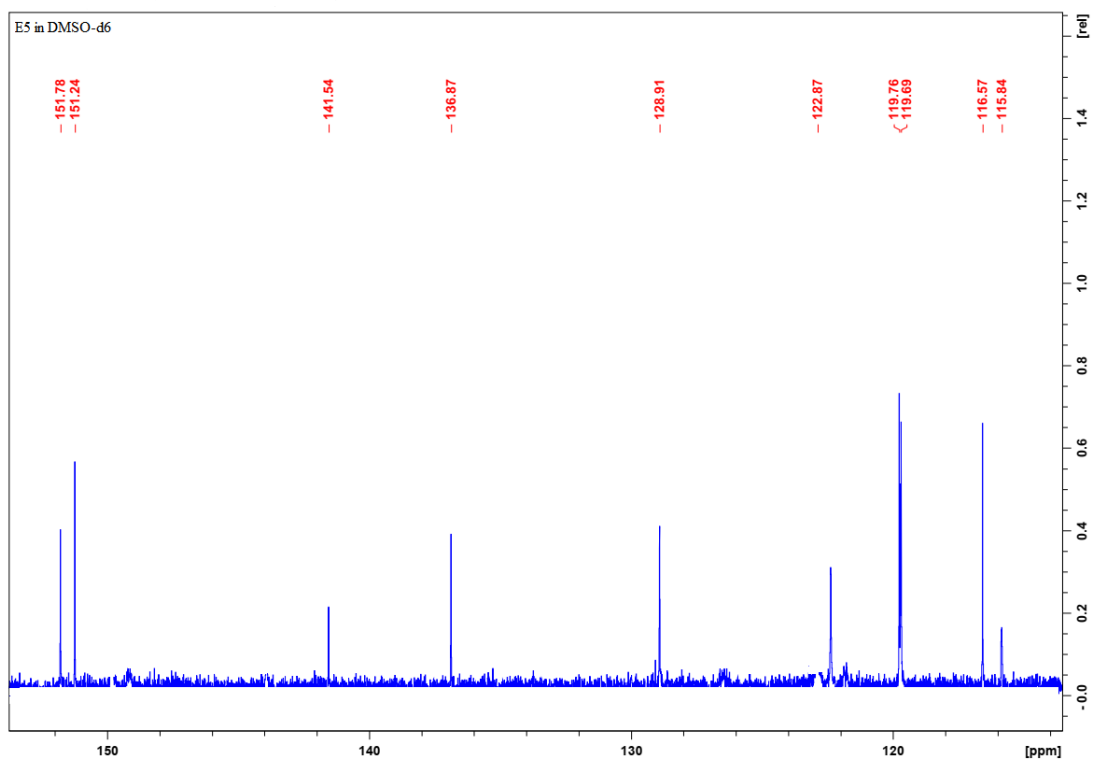

Figure S100:  $[\text{Ag}(\text{E}_a)_2]\text{ClO}_4$  5

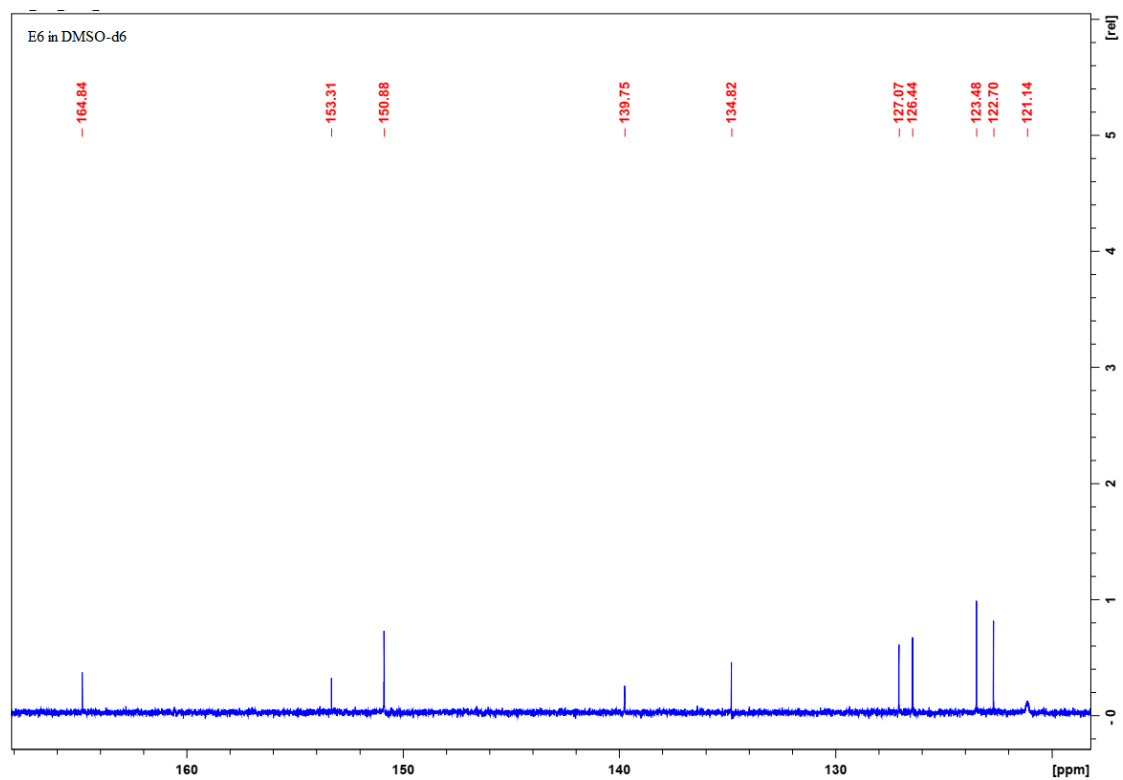

Figure S101:  $[\text{Ag}(\text{E}_b)_2]\text{ClO}_4$  6

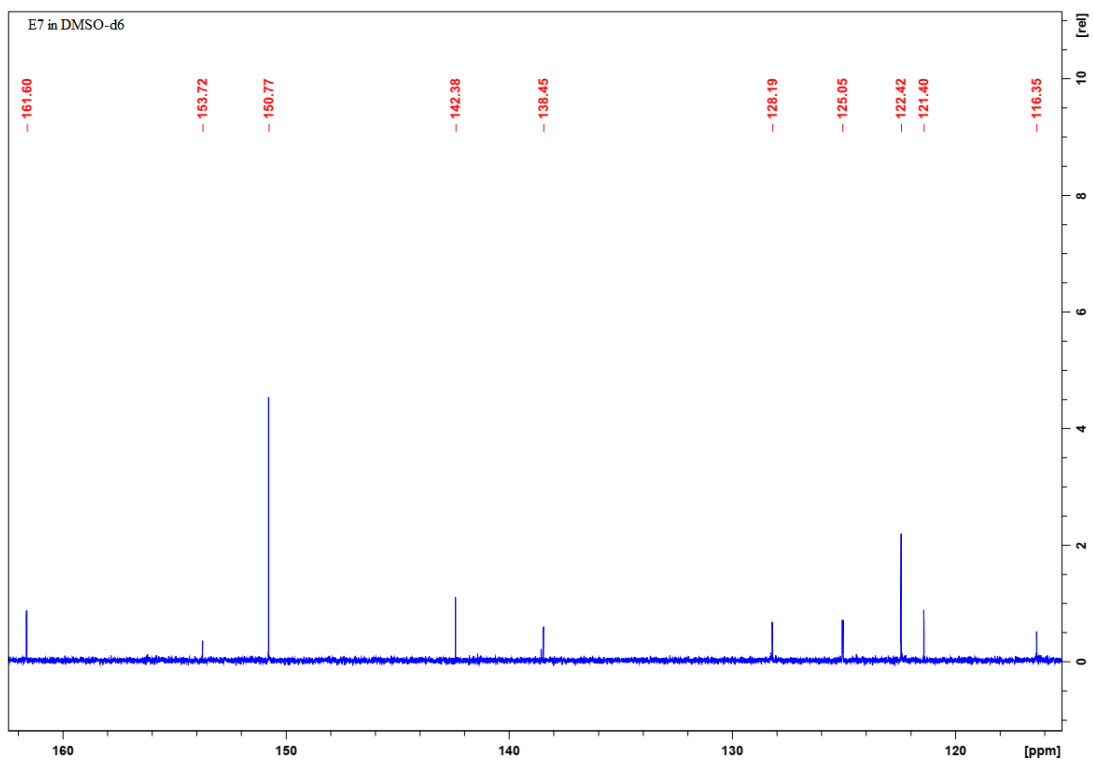

Figure S102:  $[\text{Ag}(\text{E}_c)_2]\text{ClO}_4$  7

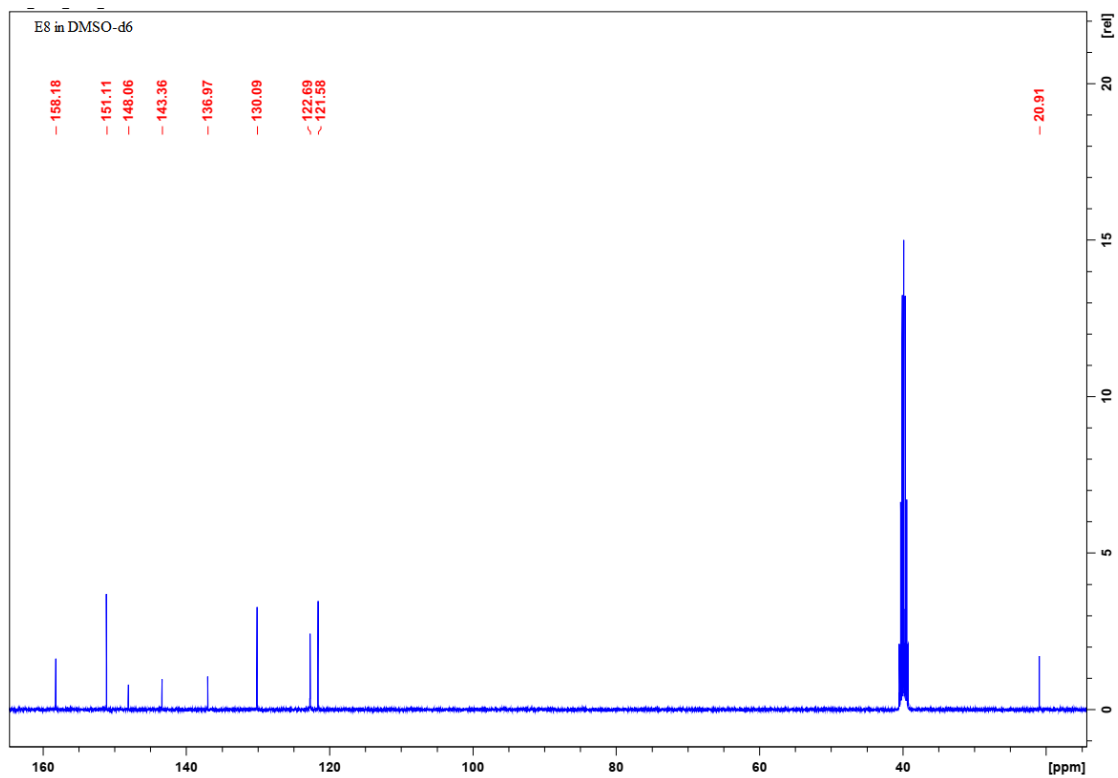

Figure S103:  $[\text{Ag}(\text{E}_d)_2]\text{ClO}_4$  8

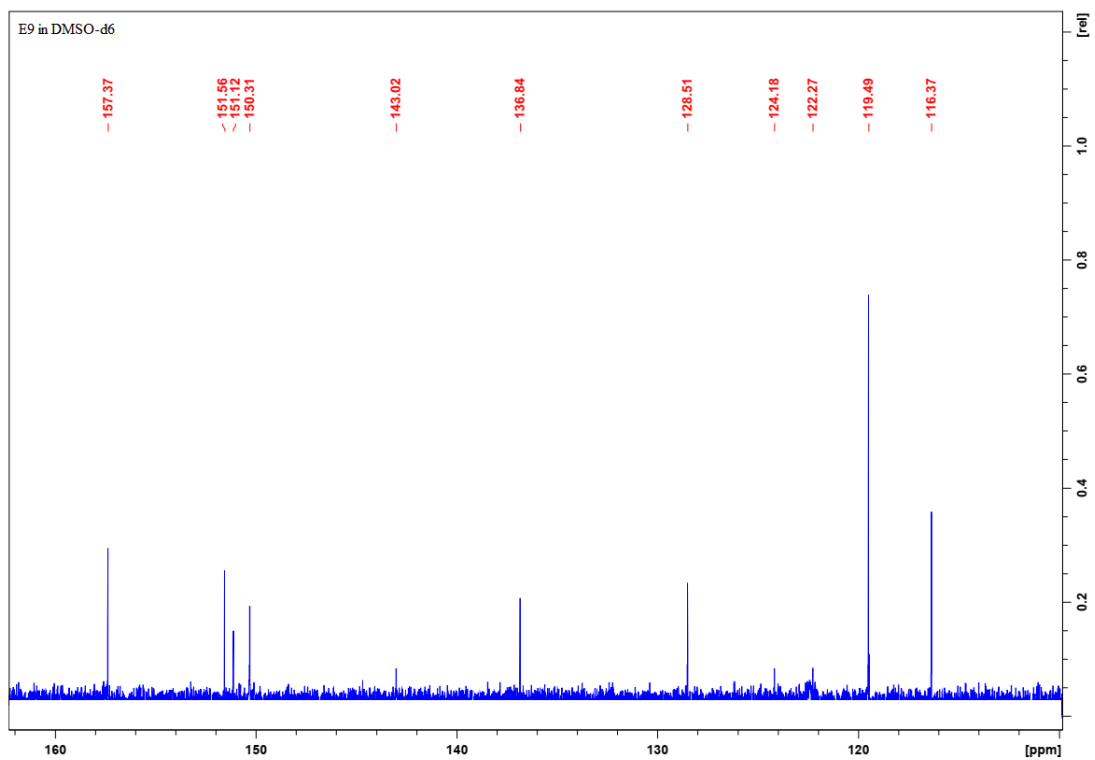

Figure S104:  $[\text{Ag}(\text{E}_a)_2]\text{CF}_3\text{SO}_3$  9

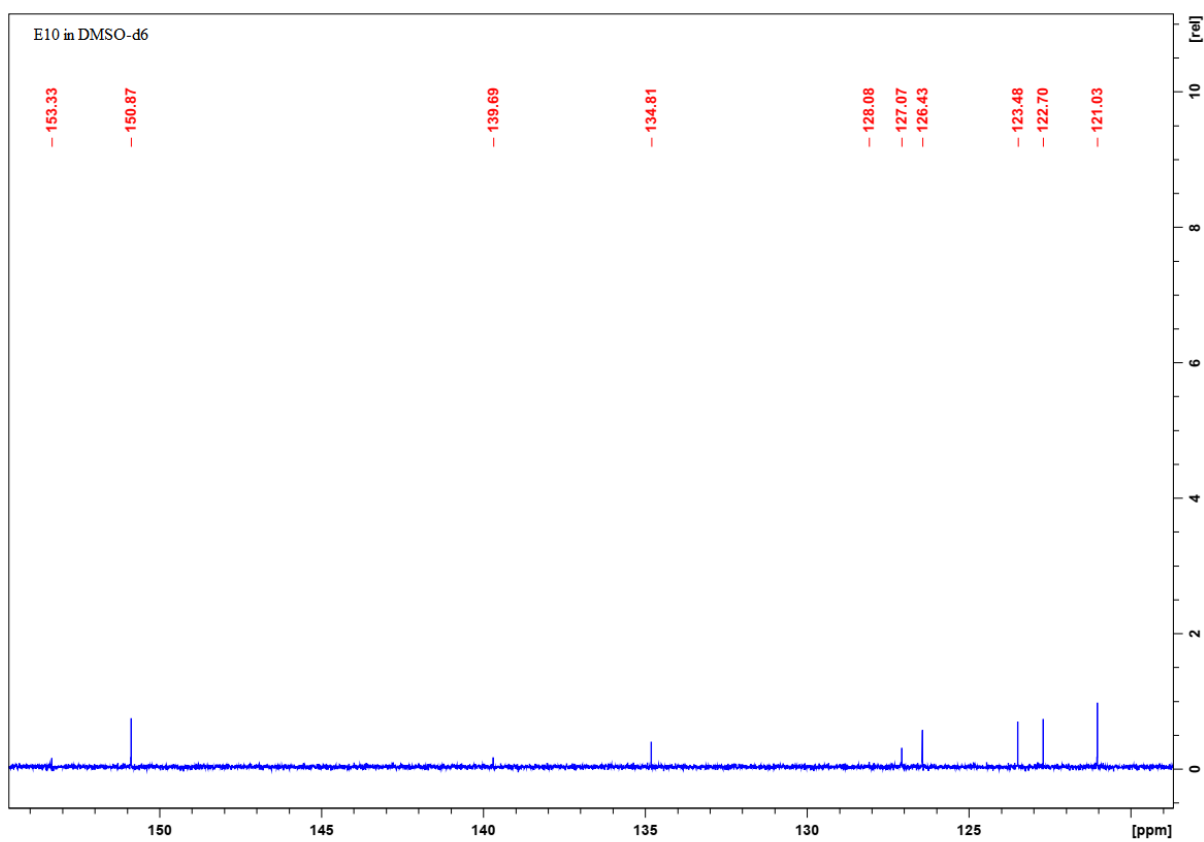

Figure S105:  $[\text{Ag}(\text{E}_b)_2]\text{CF}_3\text{SO}_3$  10

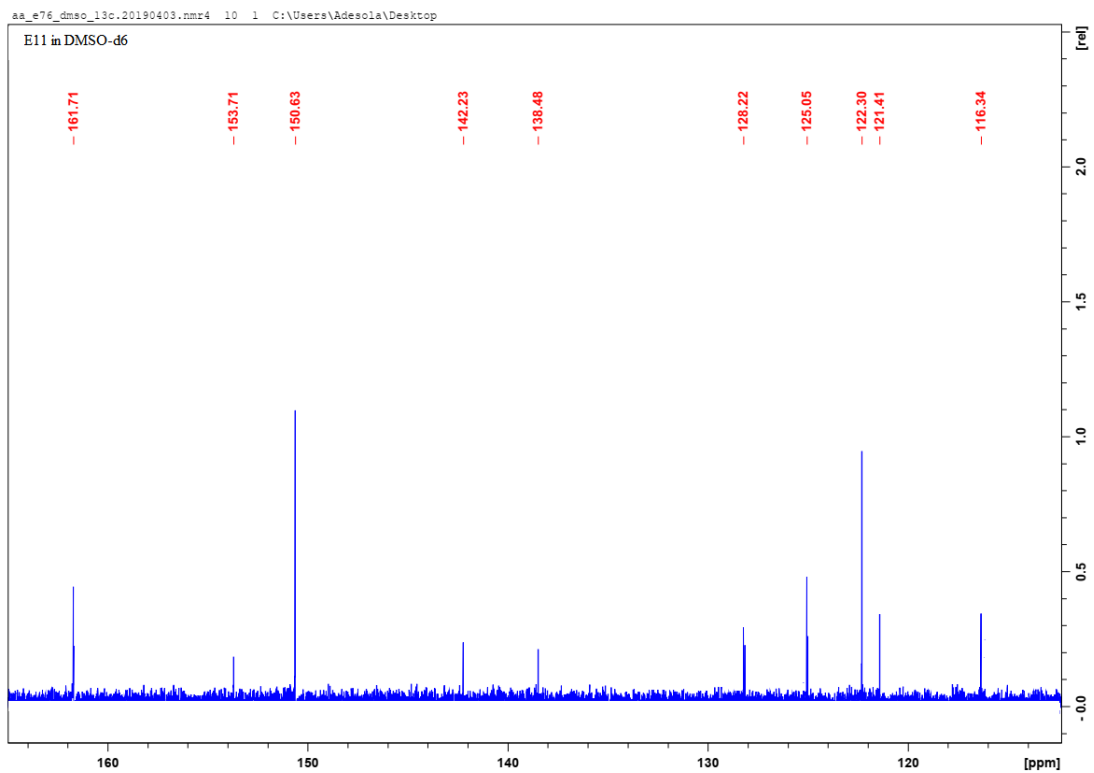

Figure S106:  $[\text{Ag}(\text{E}_c)_2]\text{CF}_3\text{SO}_3$  11

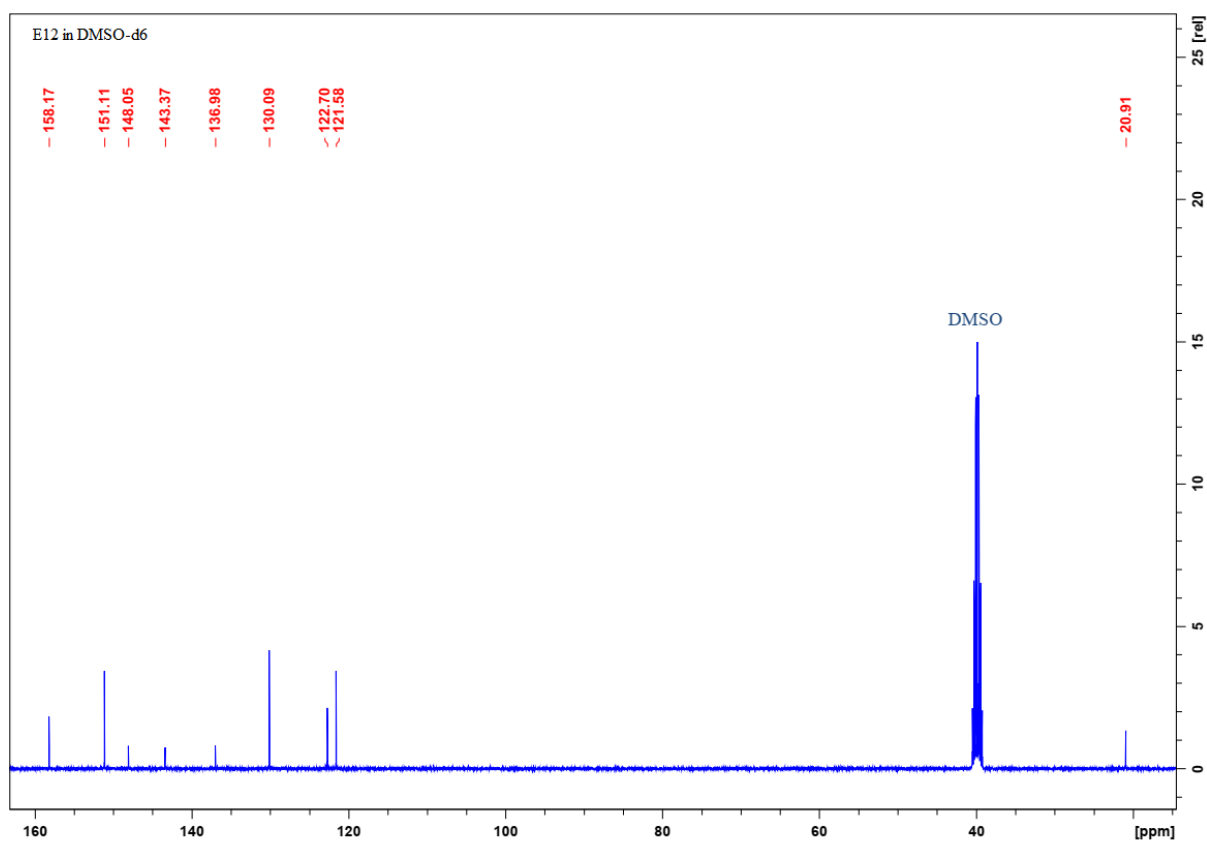

Figure S107:  $[\text{Ag}(\text{E}_d)_2]\text{CF}_3\text{SO}_3$  12

## IR SPECTRA OF LIGANDS E<sub>a-d</sub>

*Agilent Resolutions Pro*

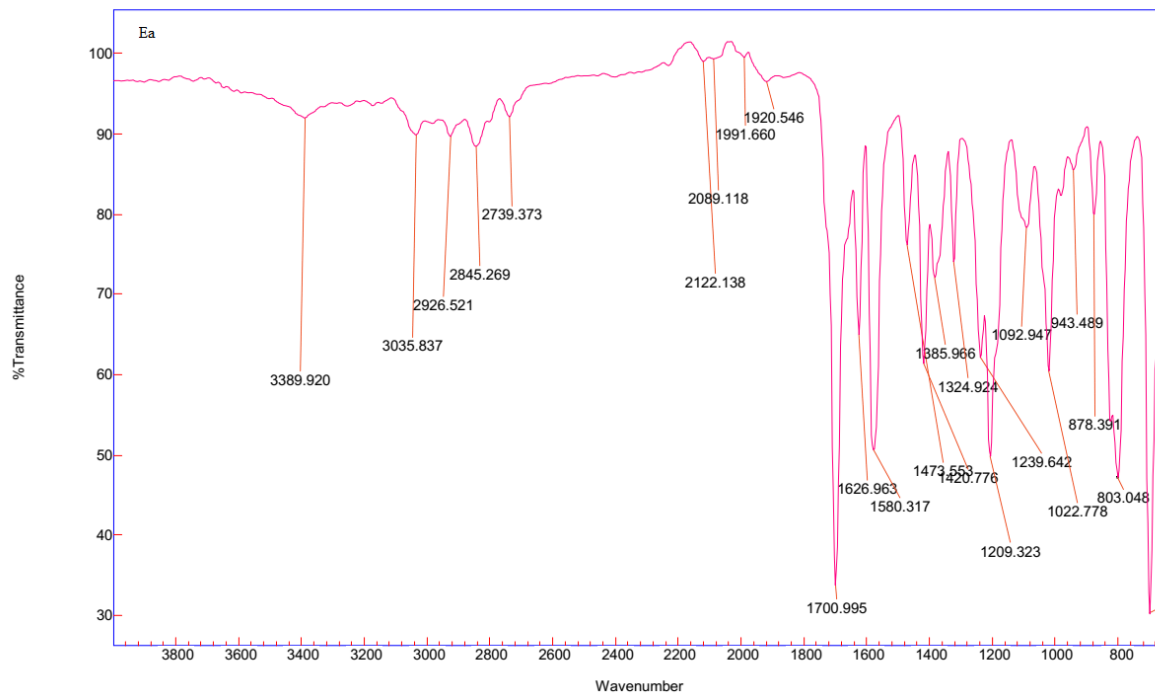

Figure S108: (E)-2-((pyridin-4-ylmethylene)amino)phenol E<sub>a</sub>

*Agilent Resolutions Pro*

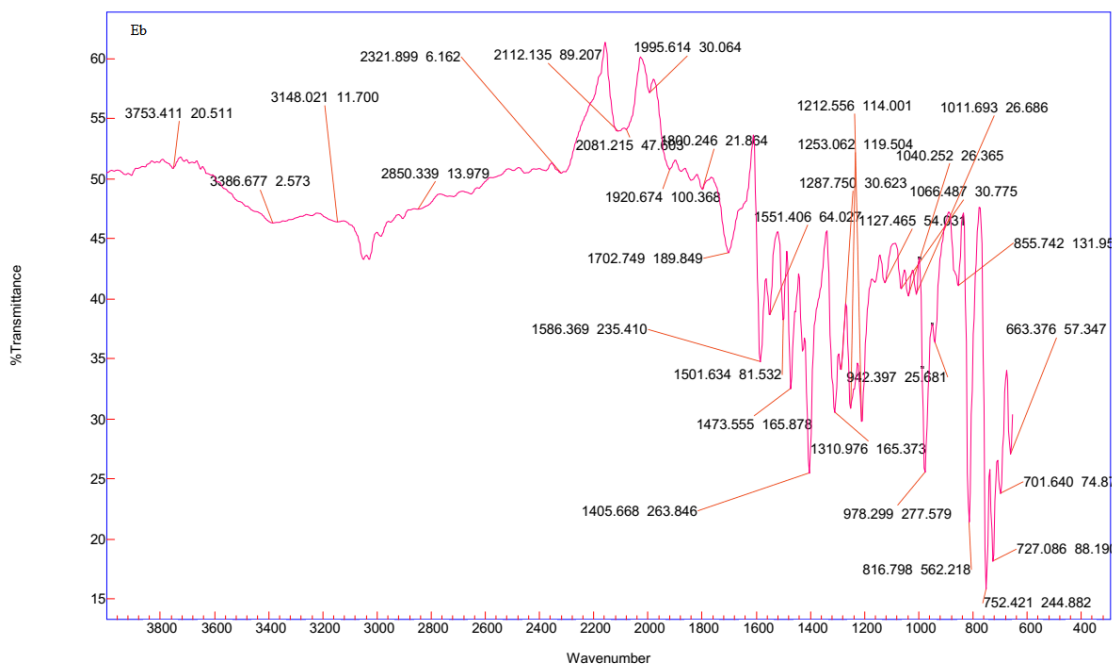

Figure S109: 2-(pyridin-4-yl)benzo[d]thiazole E<sub>b</sub>



Agilent Resolutions Pro

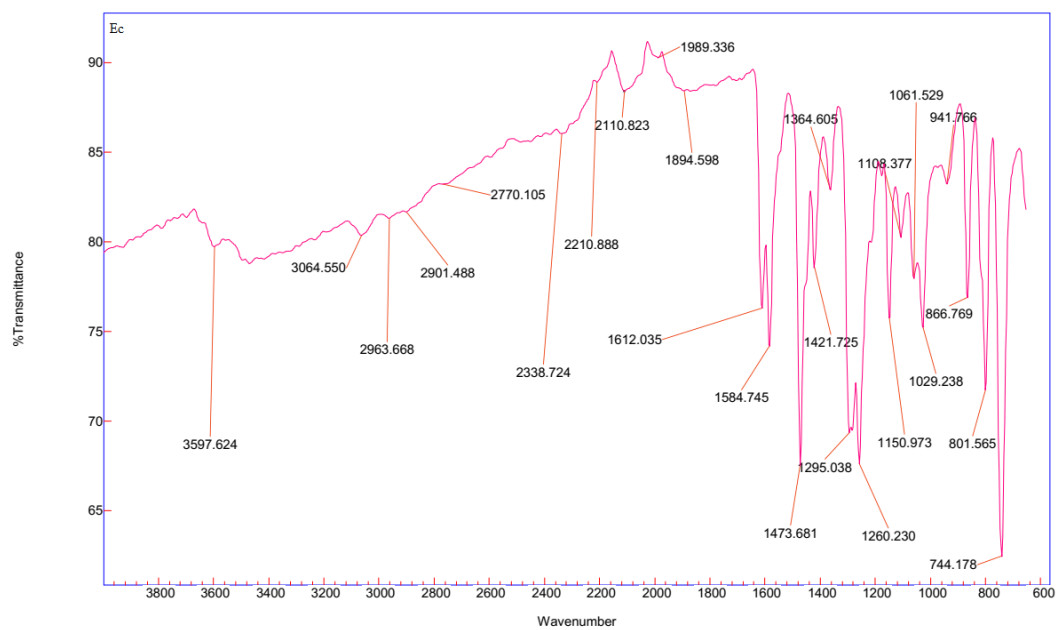

Figure S110: (E)-N-(2-fluorophenyl)-1-(pyridin-4-yl)methanimine E<sub>c</sub>

Agilent Resolutions Pro

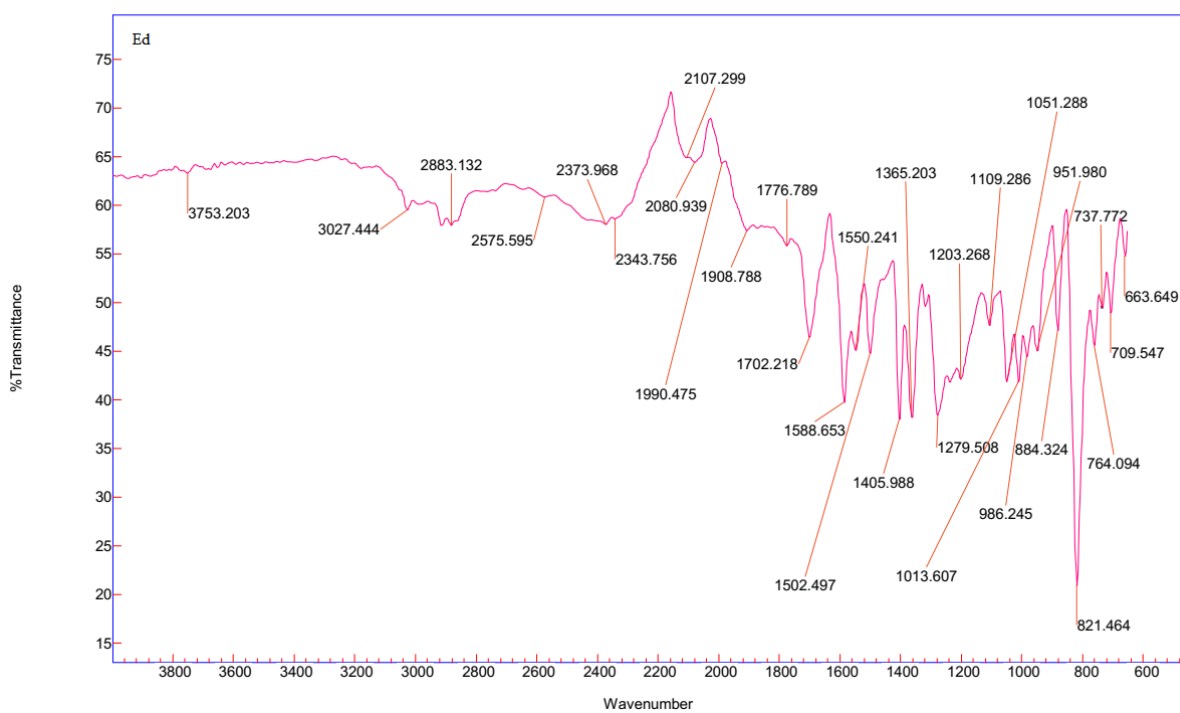

Figure S111: (E)-1-(pyridin-4-yl)-N-(p-tolyl)methanimine E<sub>d</sub>

# IR SPECTRA OF COMPLEXES 1-12

Agilent Resolutions Pro

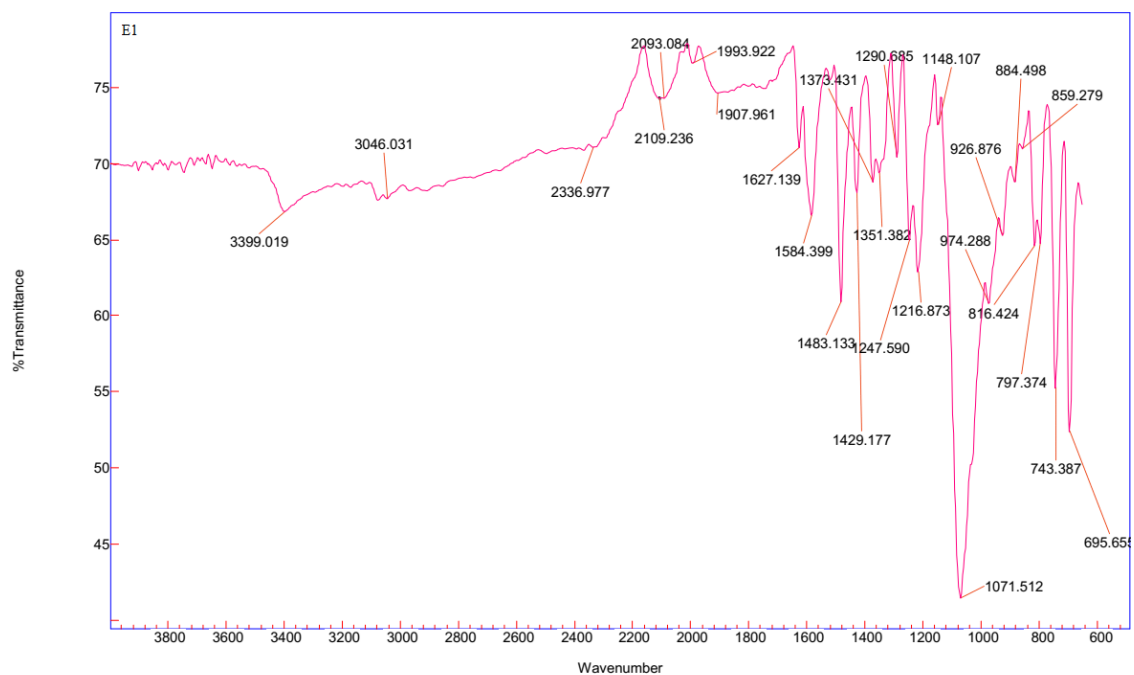

Figure S112:  $[\text{Ag}(\text{E}_a)_2]\text{NO}_3$  1

Agilent Resolutions Pro

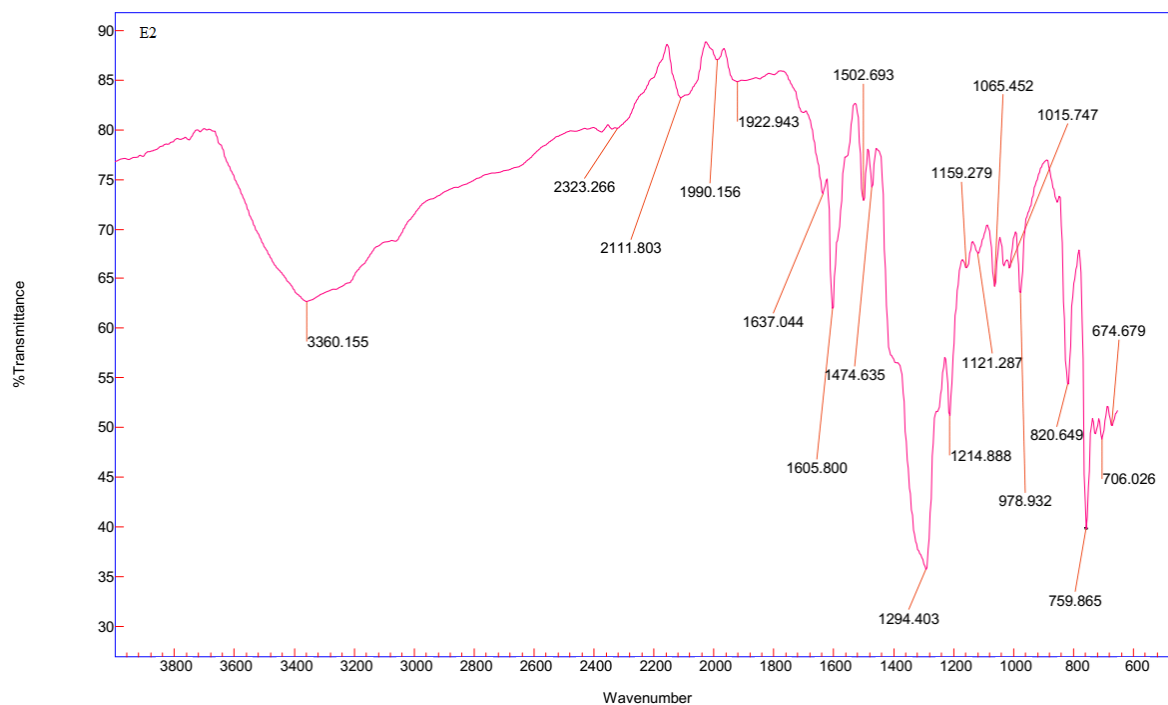

Figure S113:  $[\text{Ag}(\text{E}_b)_2]\text{NO}_3$  2

Agilent Resolutions Pro

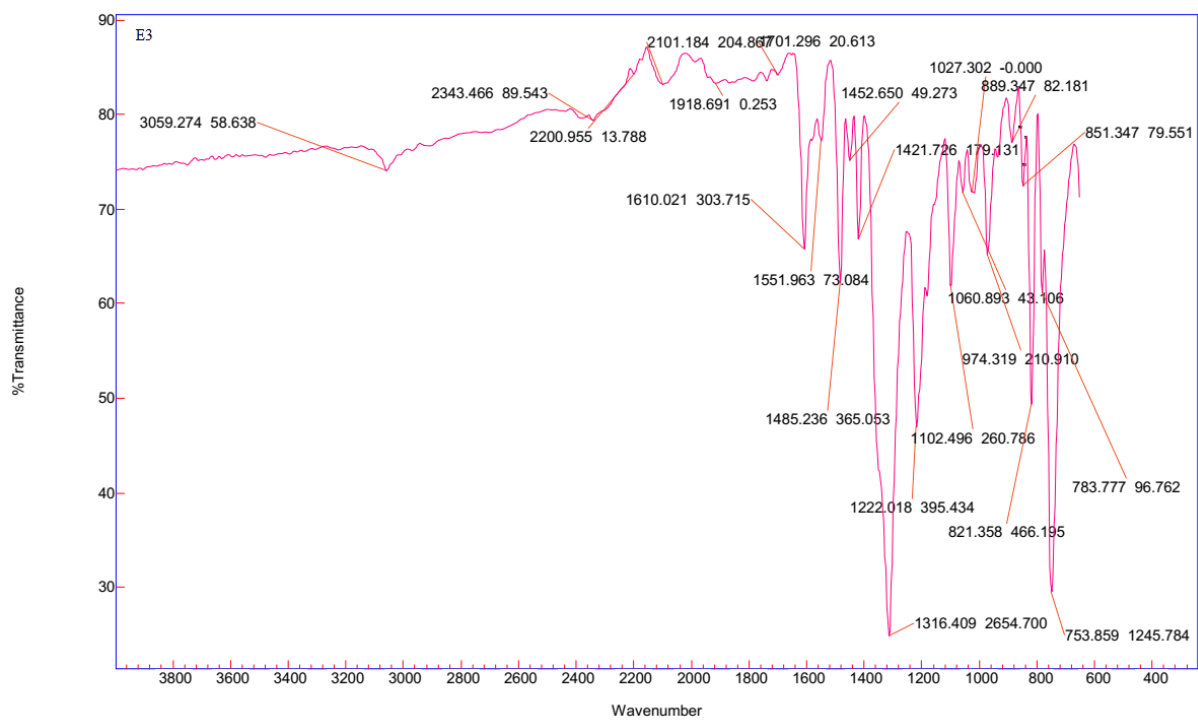

Figure S114:  $[Ag(E_c)_2]NO_3 \cdot 3$

Agilent Resolutions Pro

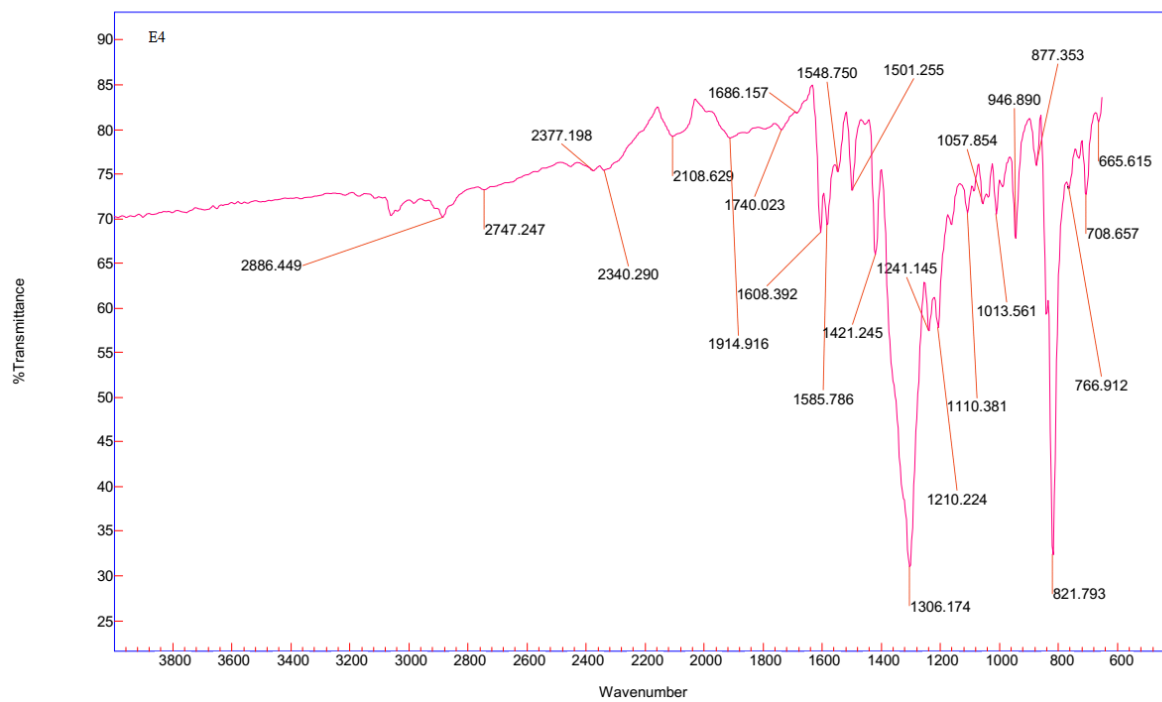

Figure S115:  $[Ag(E_d)_2]NO_3 \cdot 4$

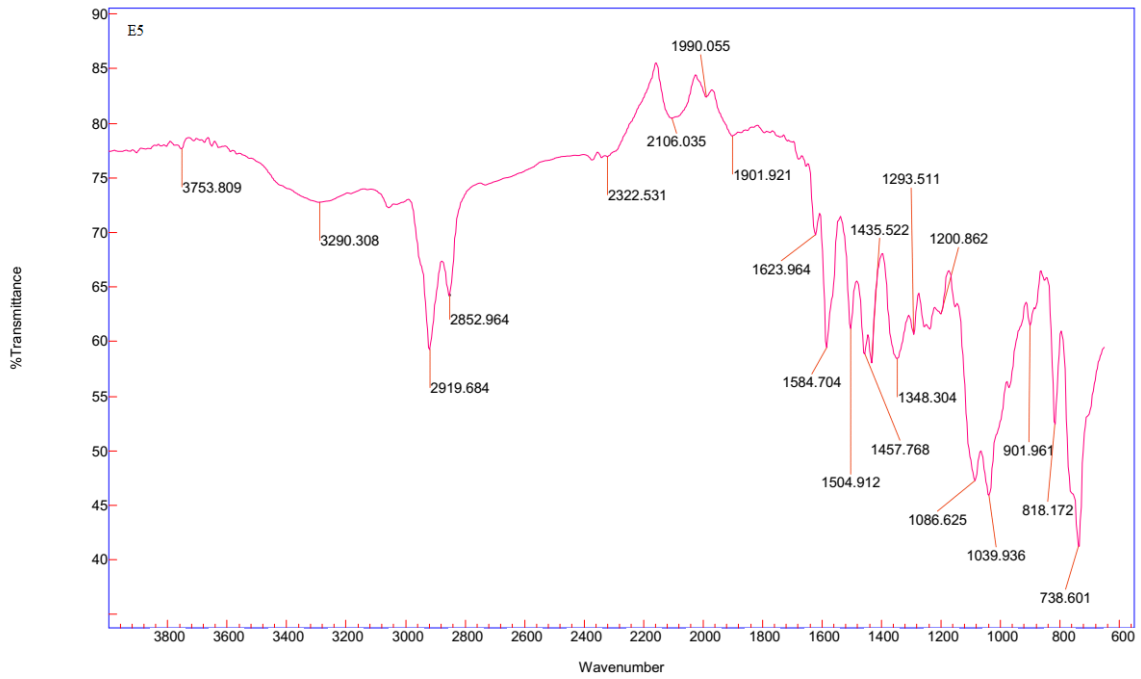

Figure S116:  $[Ag(E_a)_2]ClO_4$  5

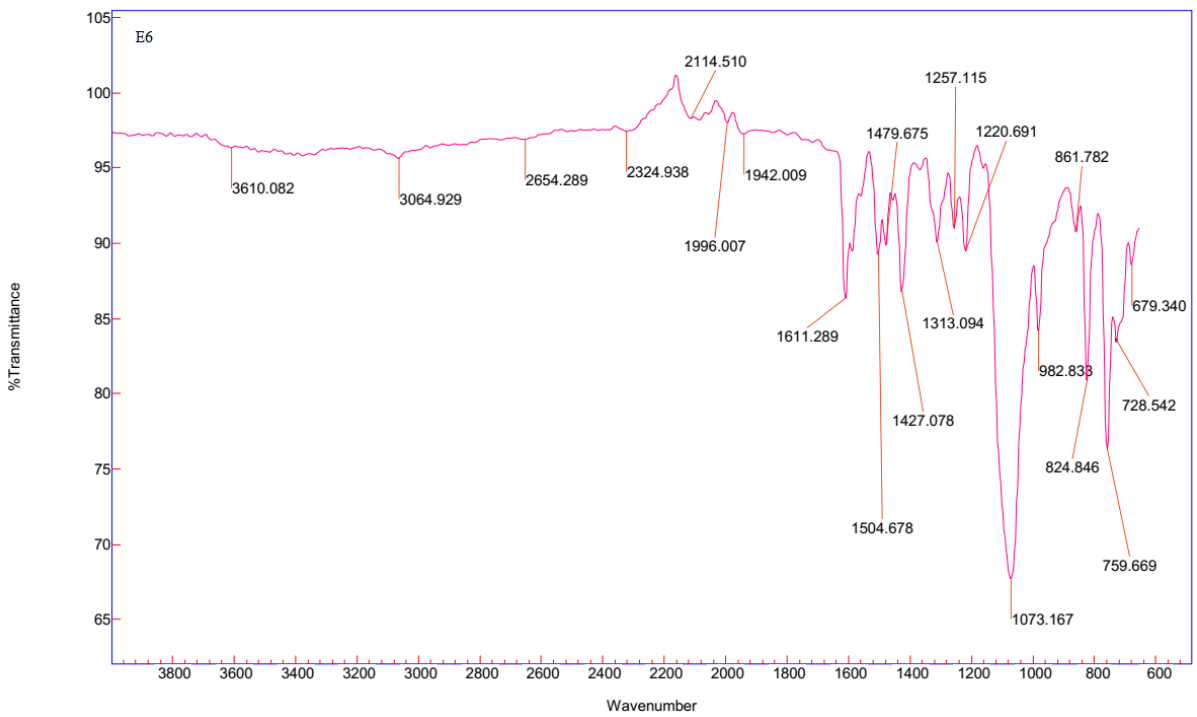

Figure S117:  $[Ag(E_b)_2]ClO_4$  6

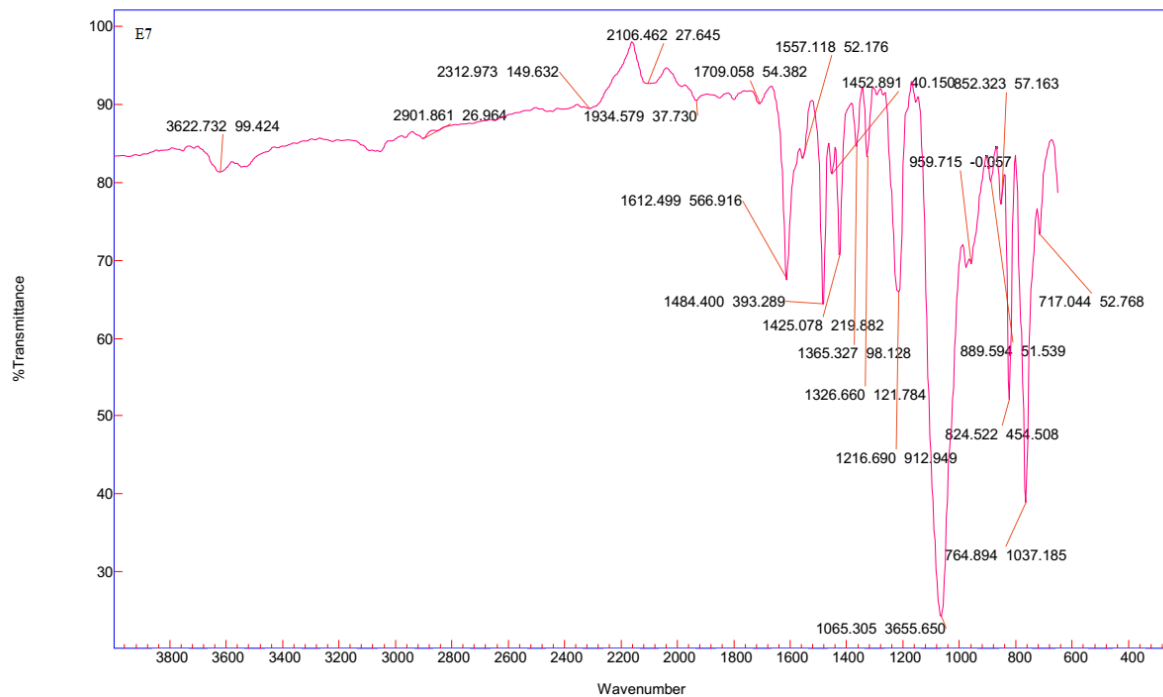

Figure S118:  $[\text{Ag}(\text{E}_c)_2]\text{ClO}_4$  7

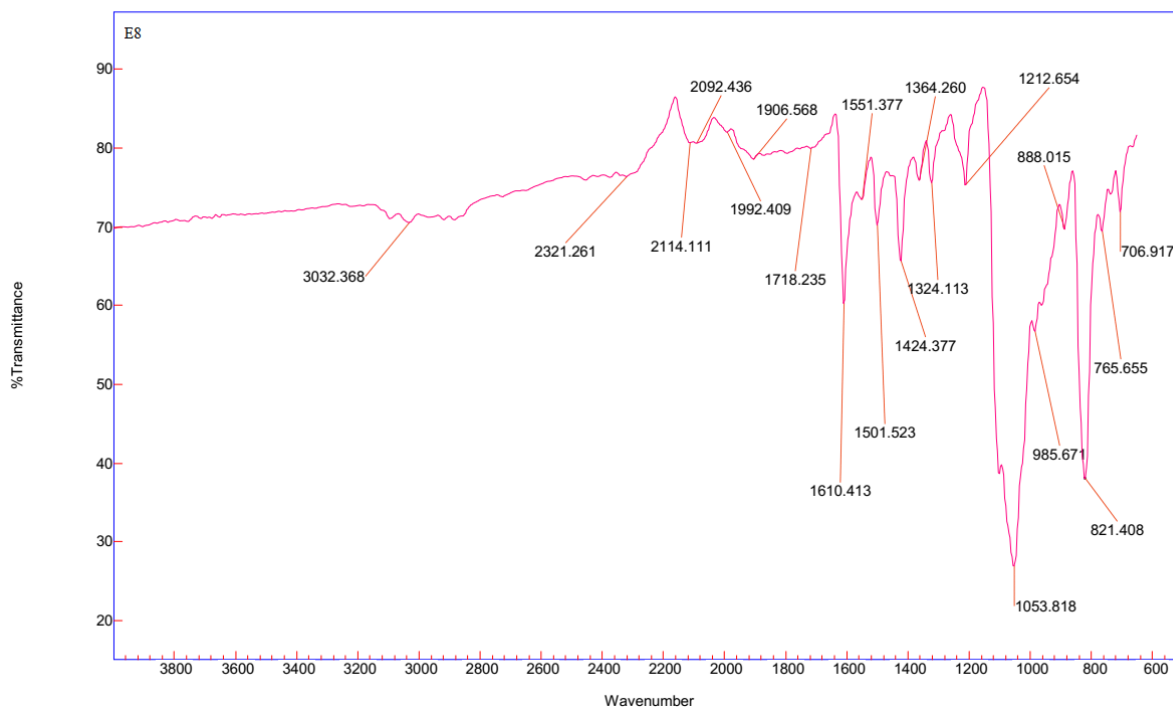

Figure S119:  $[\text{Ag}(\text{E}_d)_2]\text{ClO}_4$  8

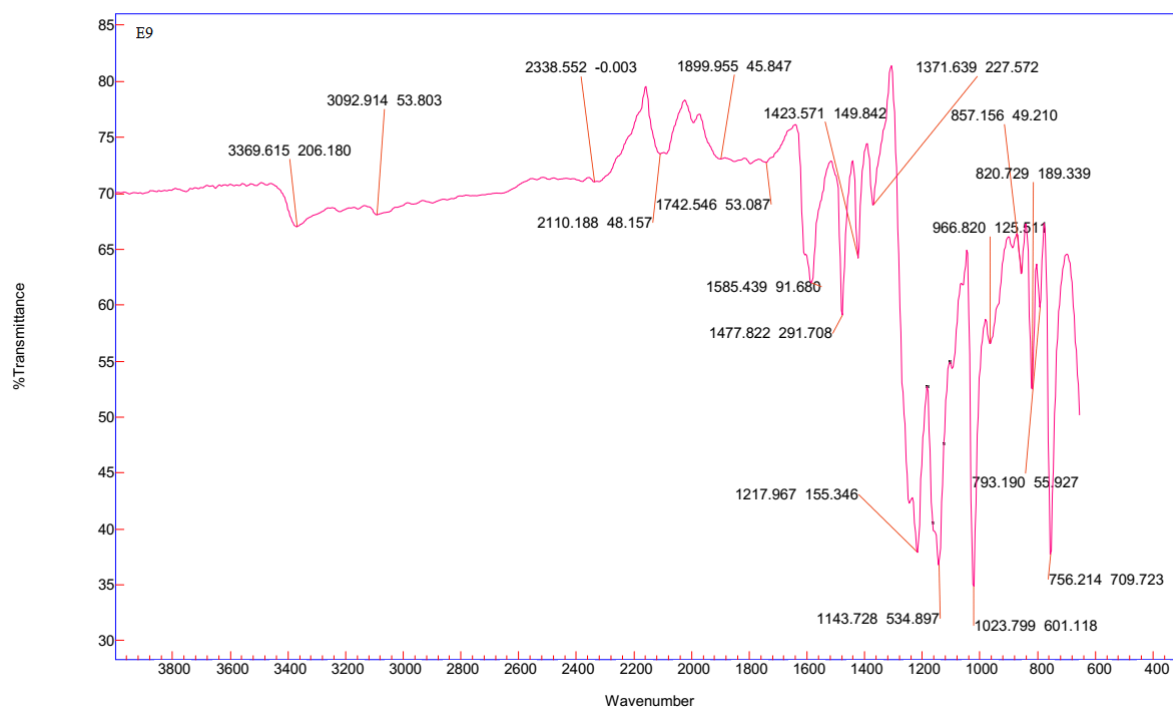

Figure S120:  $[Ag(E_a)_2]CF_3SO_3$  9

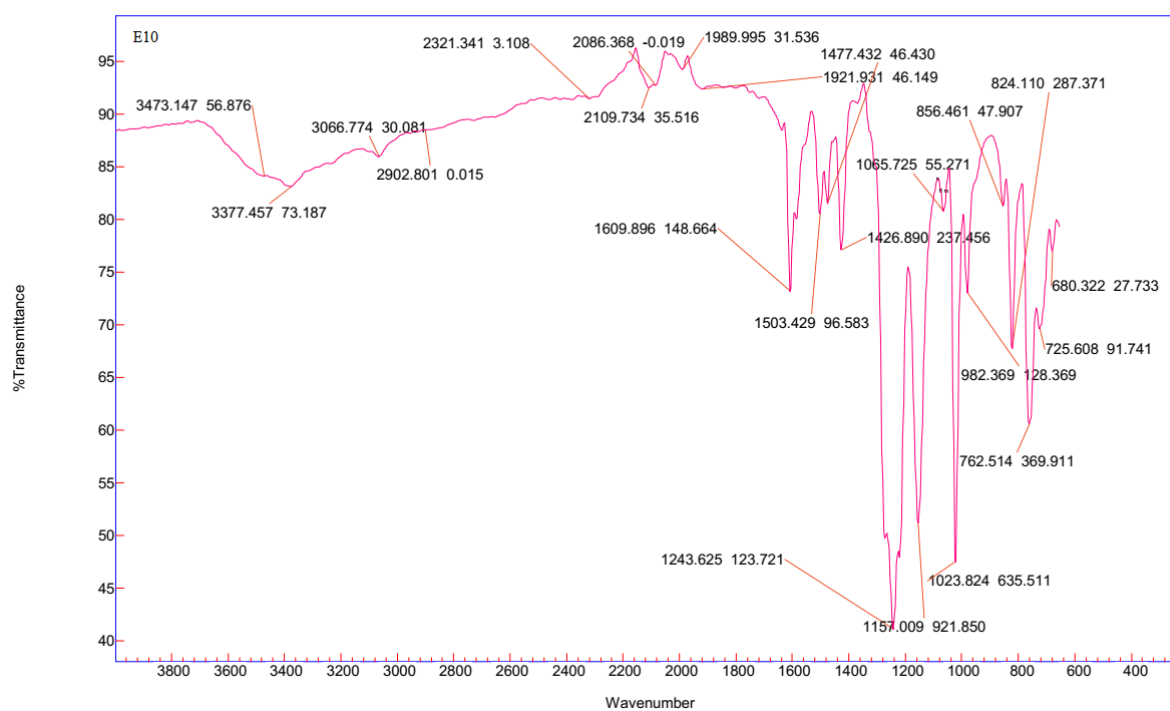

Figure S121:  $[Ag(E_b)_2]CF_3SO_3$  10

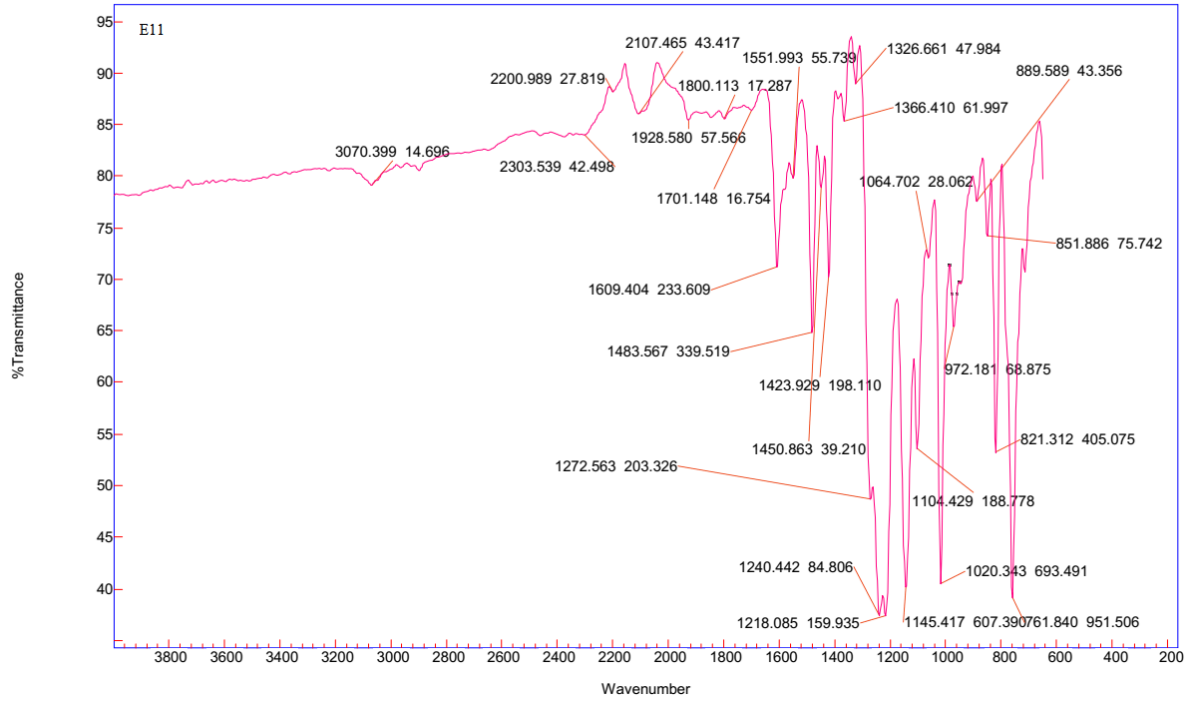

Figure S122:  $[\text{Ag}(\text{E}_c)_2]\text{CF}_3\text{SO}_3$  11

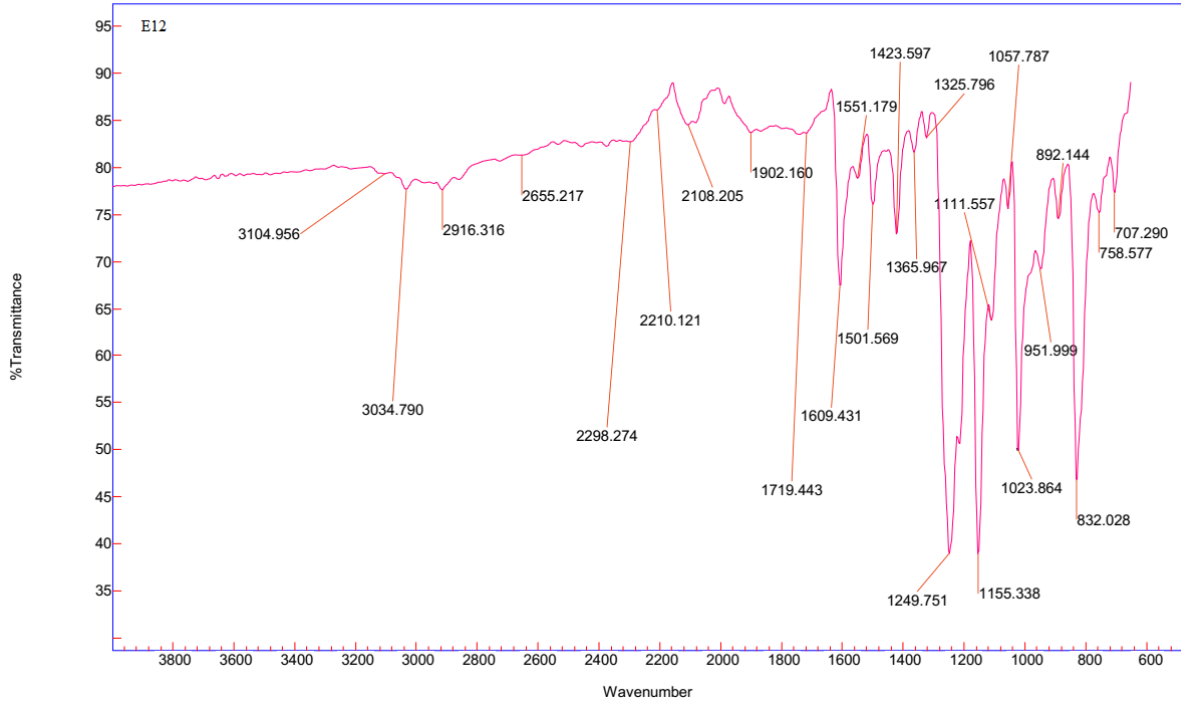

Figure S123:  $[\text{Ag}(\text{E}_a)_2]\text{CF}_3\text{SO}_3$  12

# Mass Spectra of Ligands E<sub>a-d</sub>

## ==== Shimadzu LabSolutions Data Report ====

### <Spectrum>

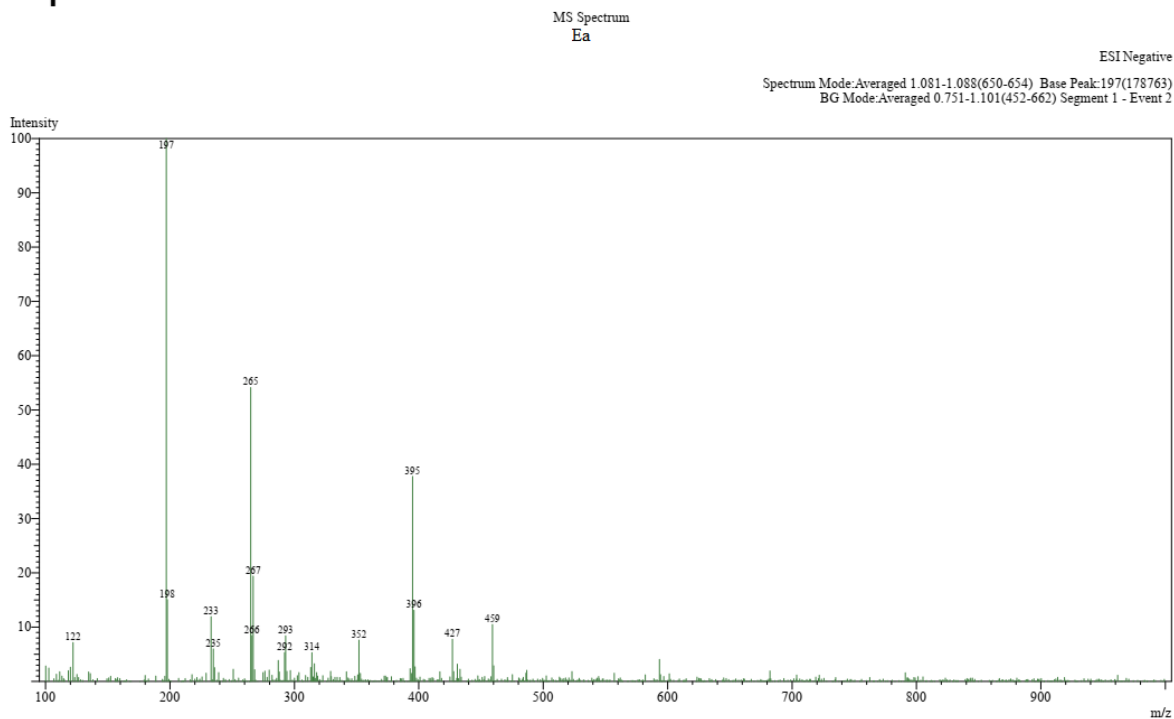

Figure S124: (E)-2-((pyridin-4-ylmethylene)amino)phenol E<sub>a</sub>

## ==== Shimadzu LabSolutions Data Report ====

### <Spectrum>

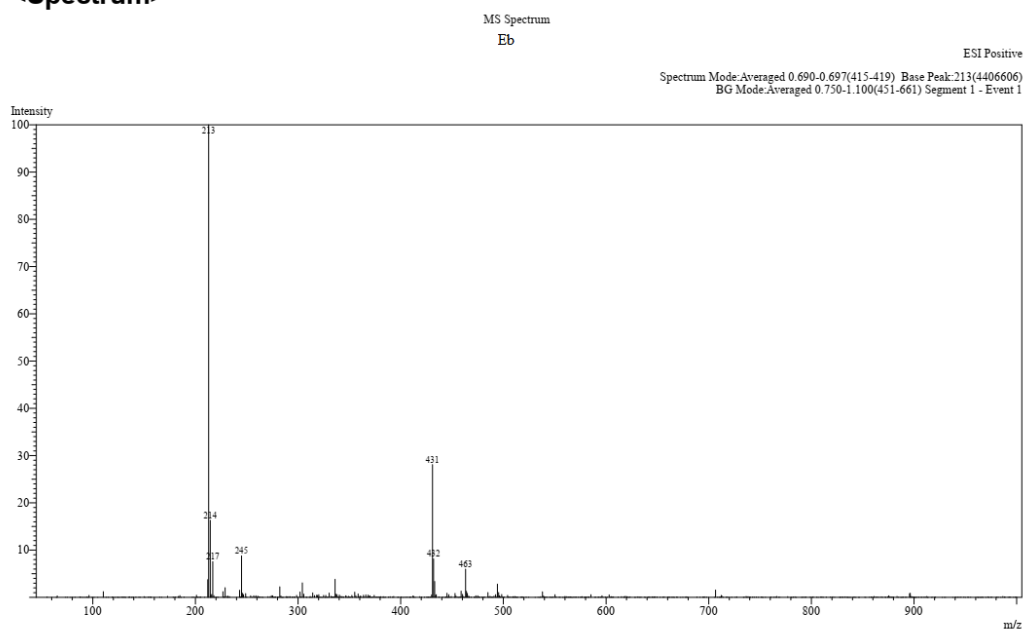

Figure S125: 2-(pyridin-4-yl)benzo[*a*]thiazole E<sub>b</sub>



==== Shimadzu LabSolutions Data Report ====

<Spectrum>

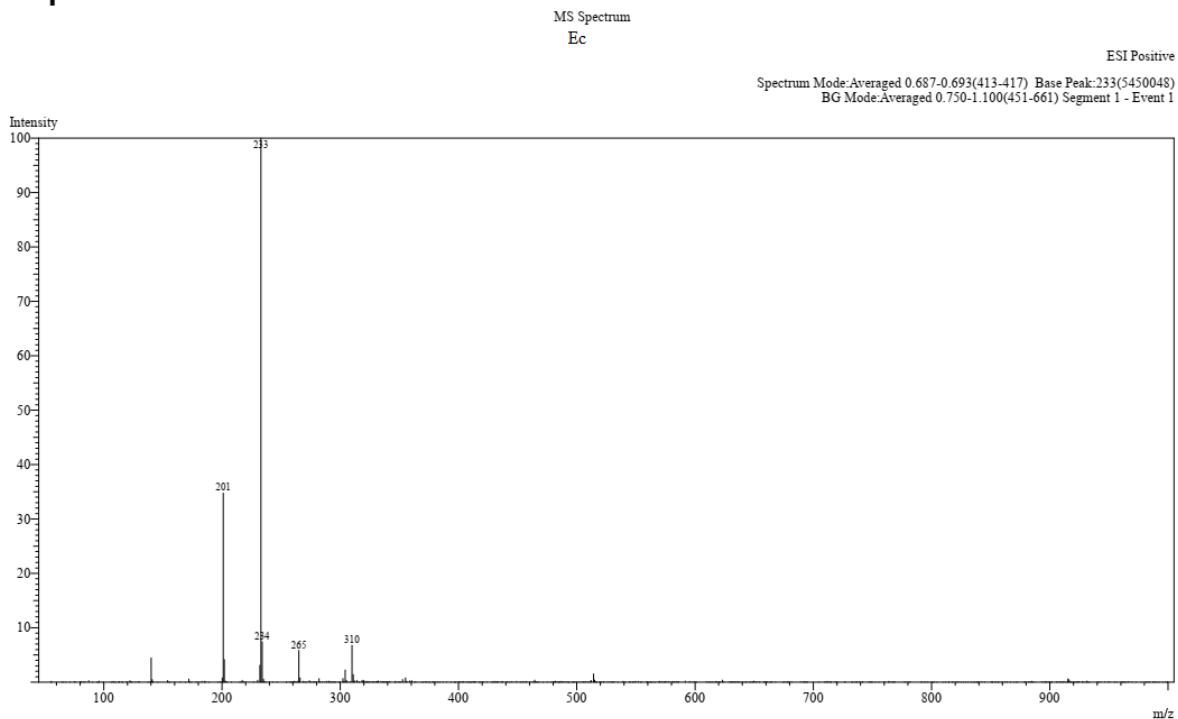

Figure S126: (E)-N-(2-fluorophenyl)-1-(pyridin-4-yl)methanimine Ec

==== Shimadzu LabSolutions Data Report ====

<Spectrum>

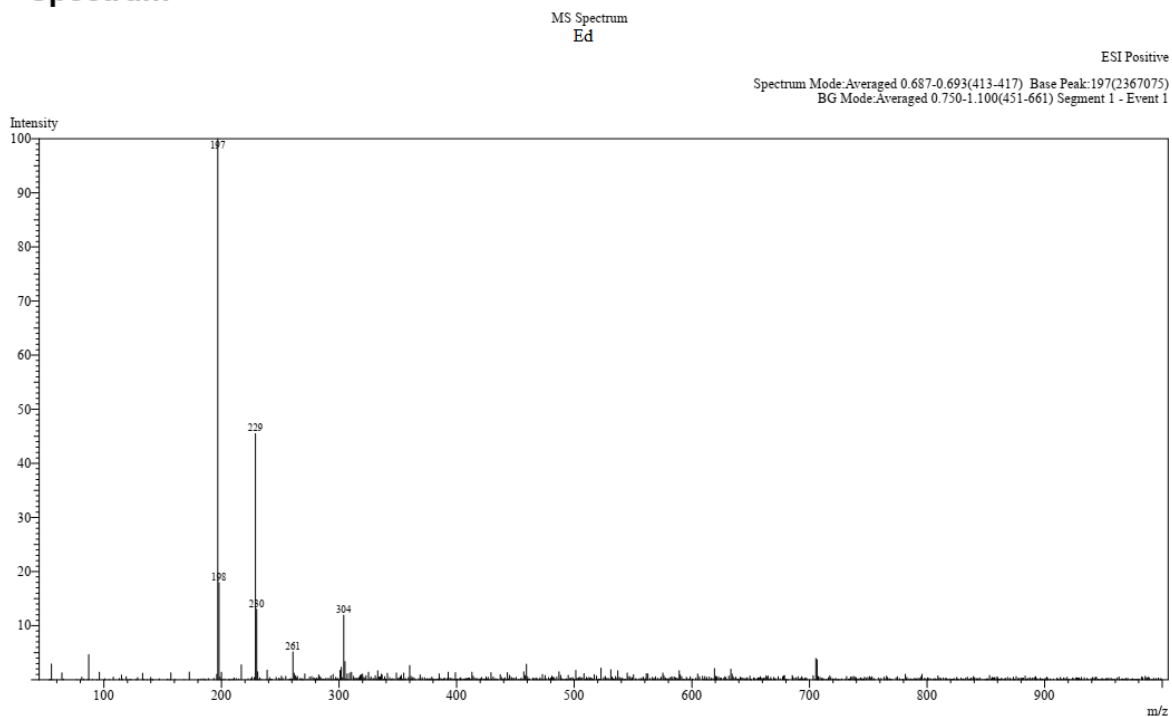

Figure S127: (E)-1-(pyridin-4-yl)-N-(p-tolyl)methanimine Ed

# MASS SPECTRA OF COMPLEXES 1-12

## ==== Shimadzu LabSolutions Data Report ====

### <Spectrum>

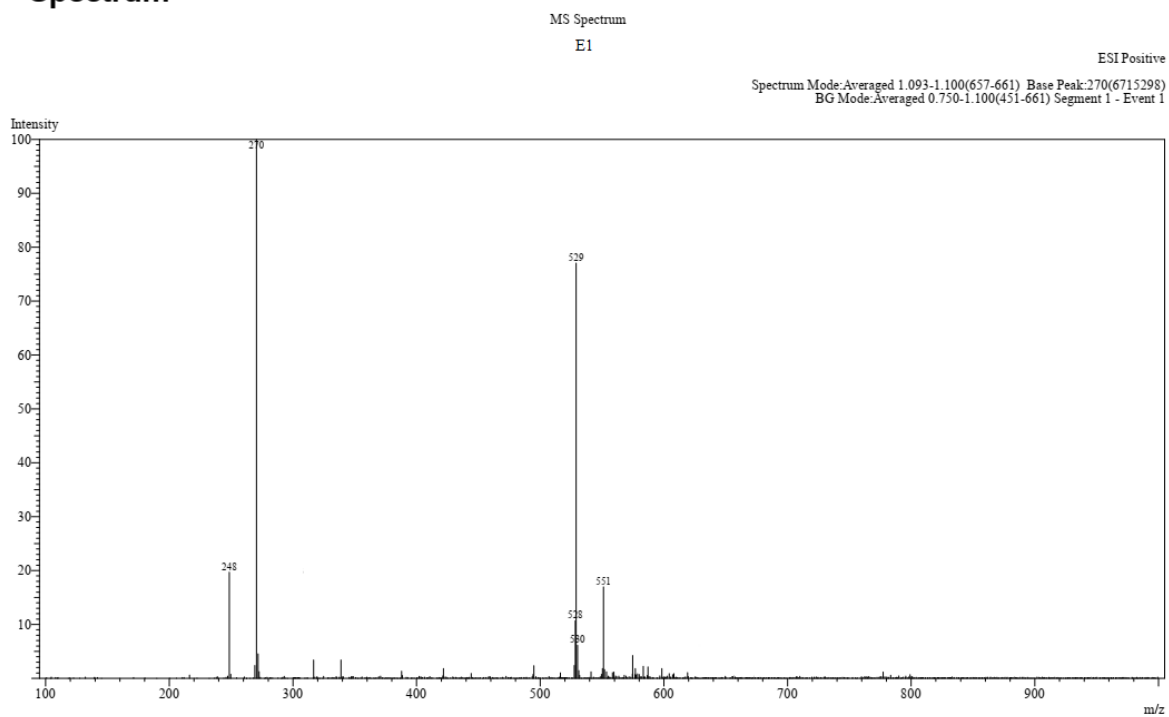

Figure S128:  $[\text{Ag}(\text{E}_a)_2]\text{NO}_3$  1

==== Shimadzu LabSolutions Data Report ====

<Spectrum>

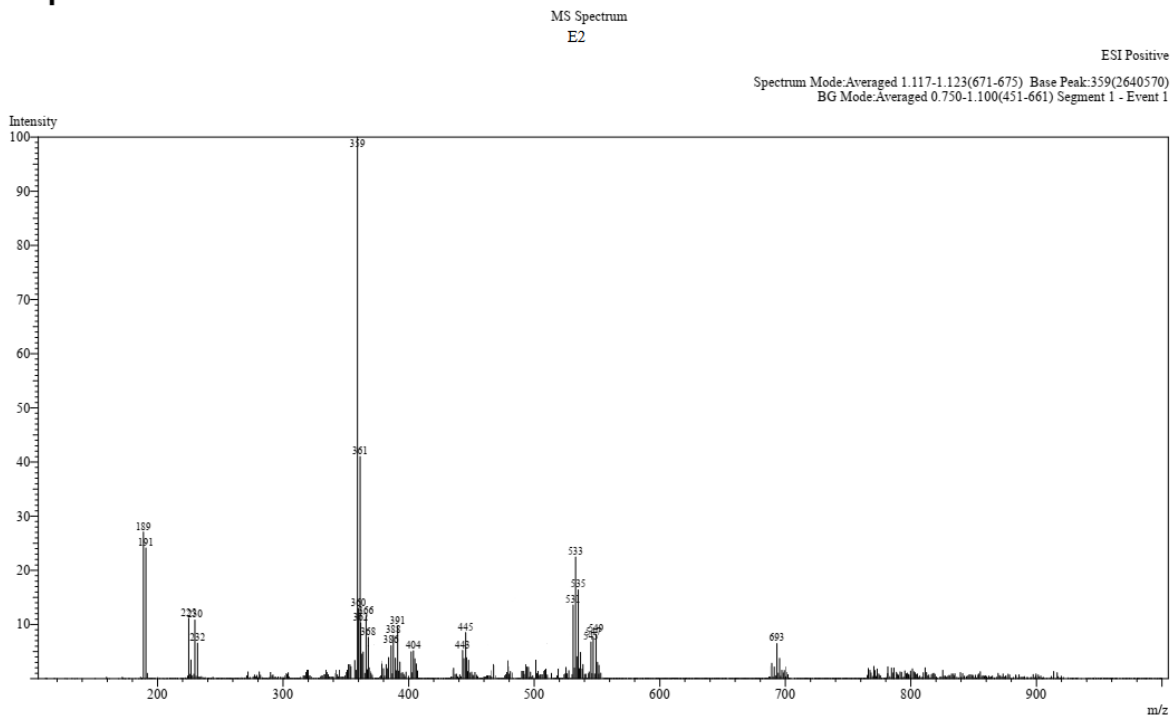

Figure S129:  $[Ag(E_b)_2]NO_3$  2

==== Shimadzu LabSolutions Data Report ====

<Spectrum>

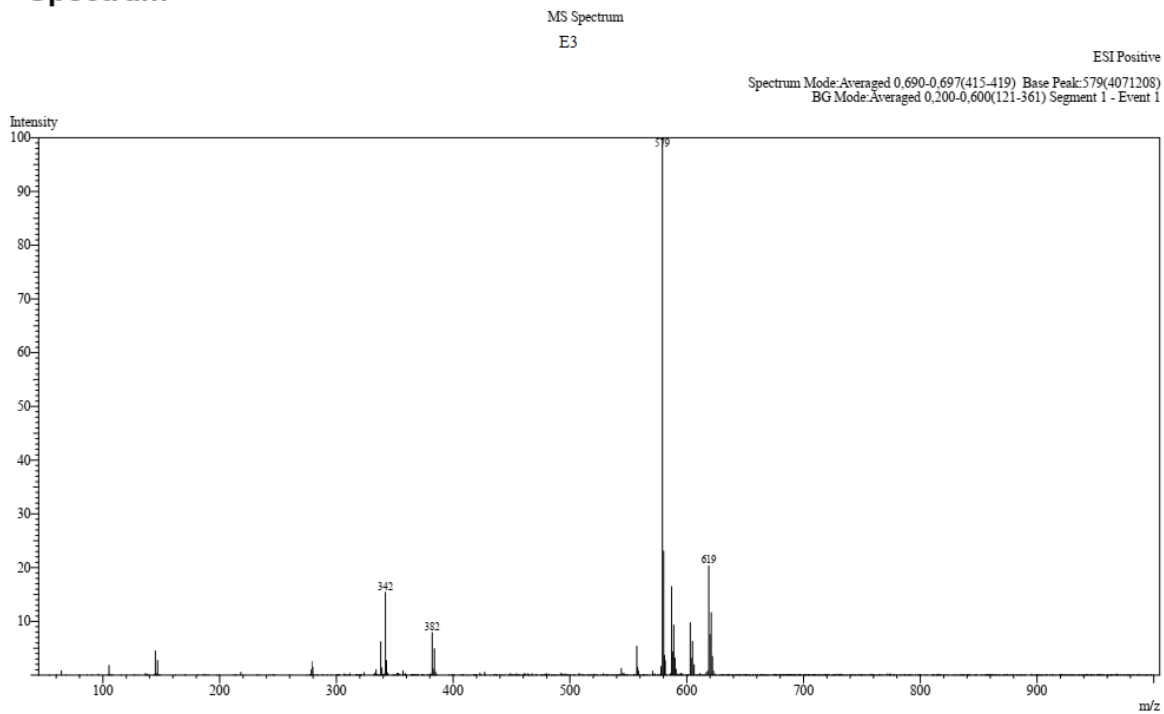

Figure S130:  $[Ag(E_c)_2]NO_3$  3

==== Shimadzu LabSolutions Data Report ====

<Spectrum>

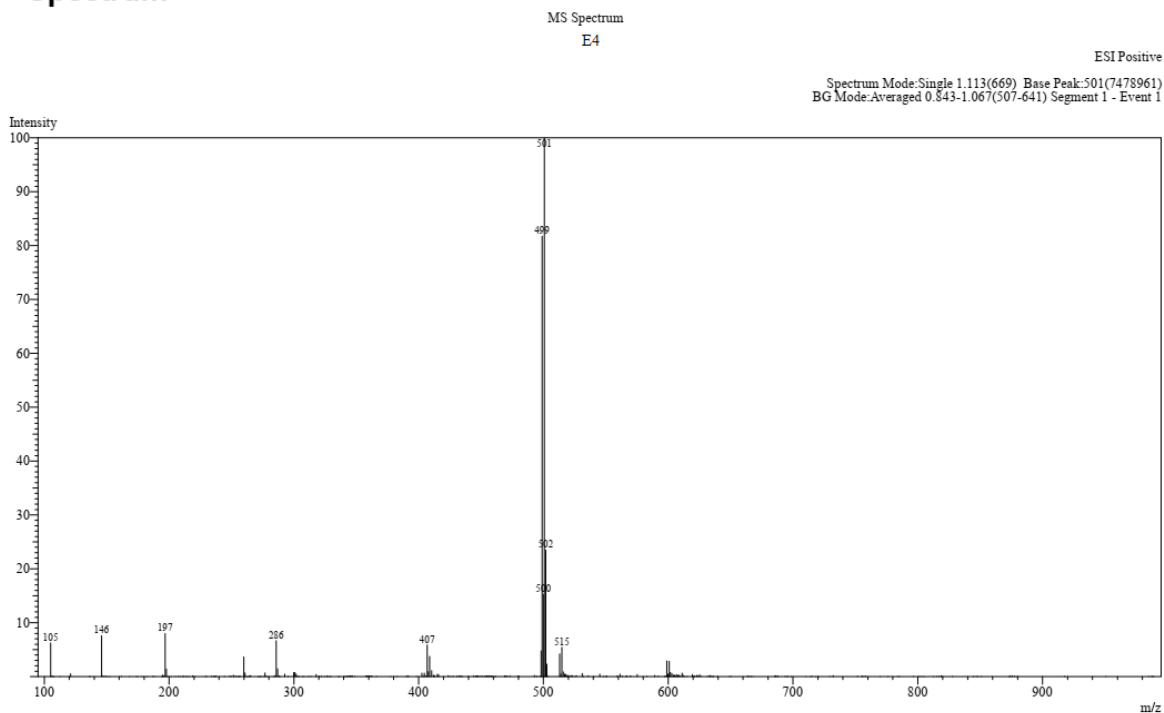

Figure S131:  $[Ag(E_d)_2]NO_3$  4

==== Shimadzu LabSolutions Data Report ====

<Spectrum>

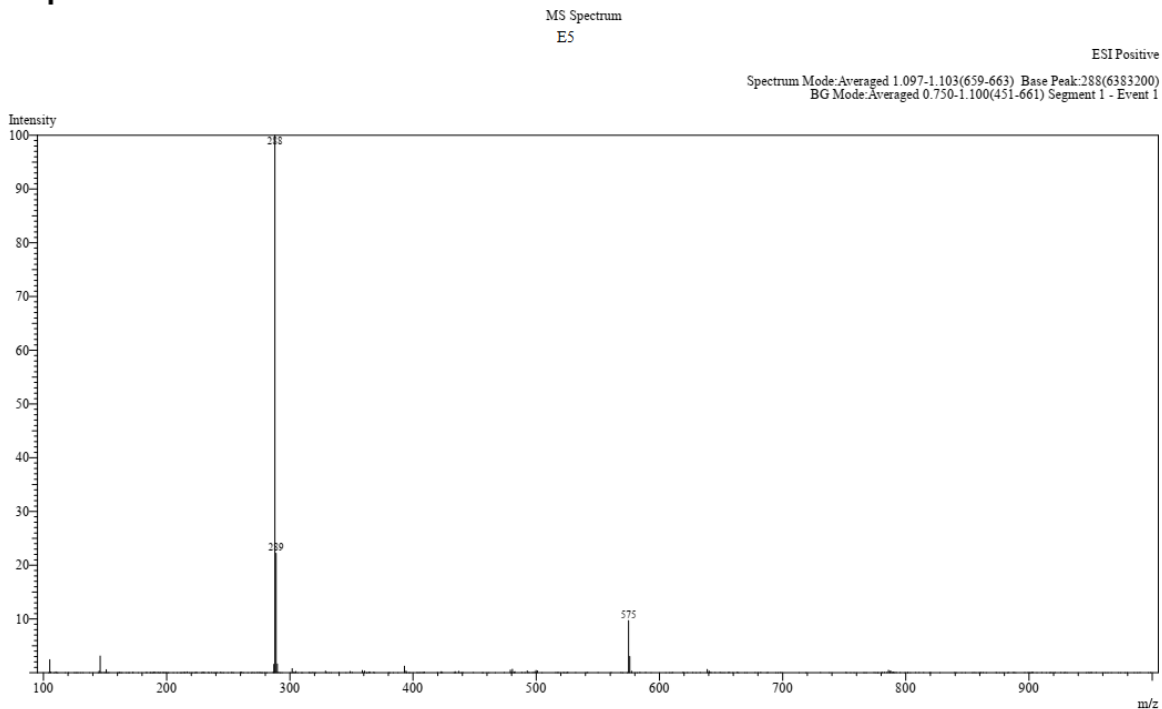

Figure S132:  $[Ag(E_a)_2]ClO_4$  5

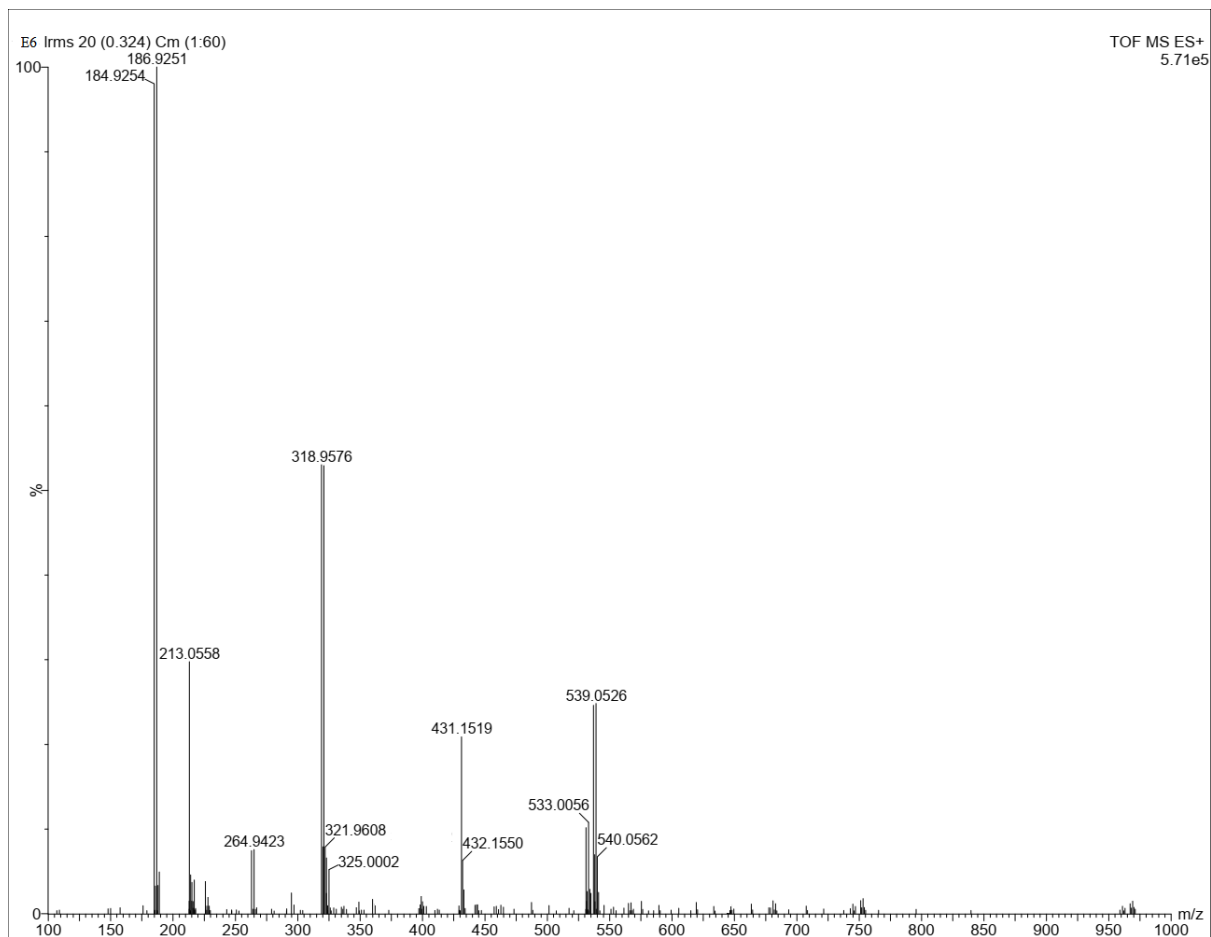

Figure S133:  $[\text{Ag}(\text{E}_6)_2]\text{ClO}_4$  6

==== Shimadzu LabSolutions Data Report ====

<Spectrum>

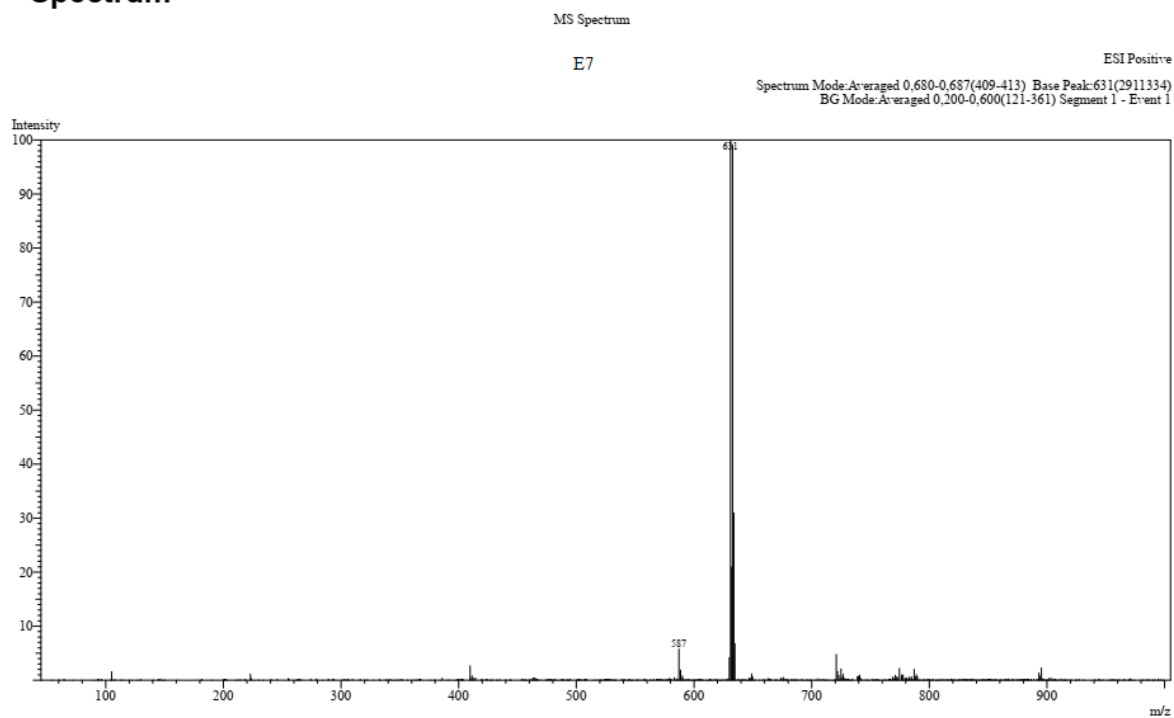

Figure S134:  $[\text{Ag}(\text{E}_c)_2]\text{ClO}_4$  7

==== Shimadzu LabSolutions Data Report ====

<Spectrum>

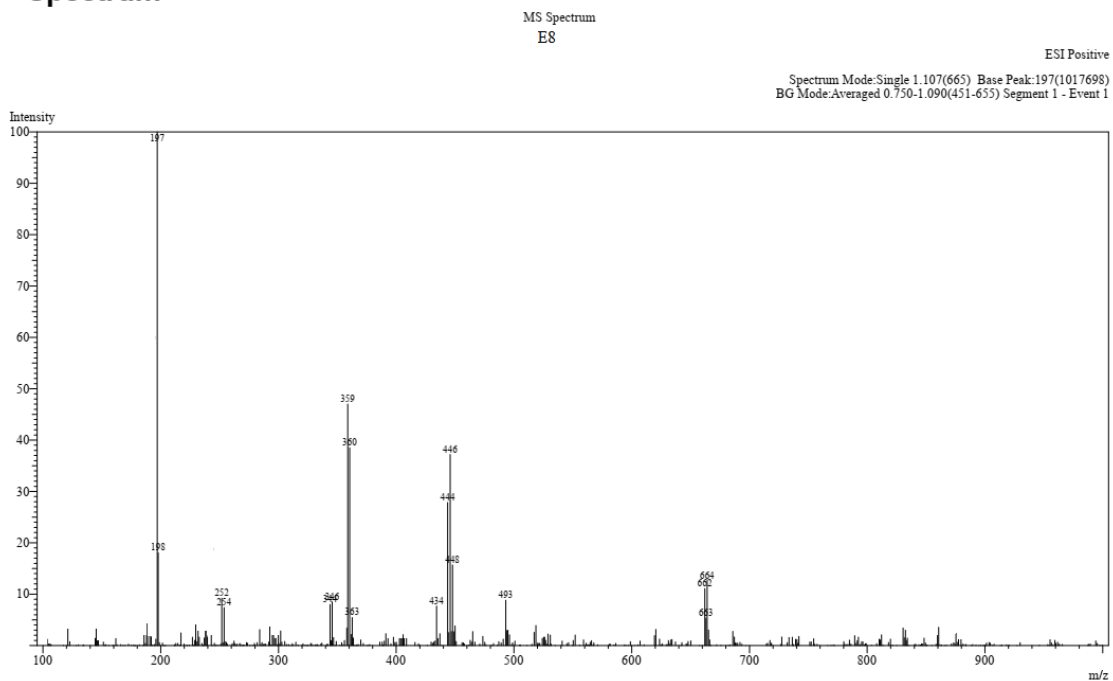

Figure S135:  $[\text{Ag}(\text{E}_d)_2]\text{ClO}_4$  8

==== Shimadzu LabSolutions Data Report ====

<Spectrum>

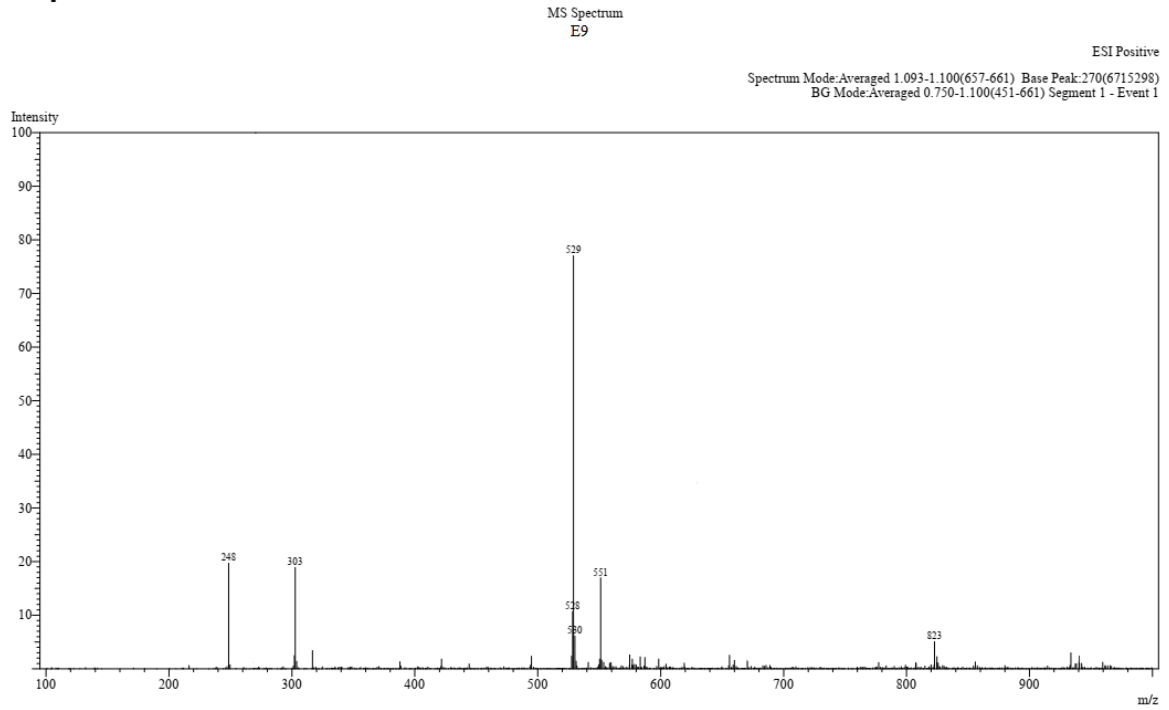

Figure S136:  $[\text{Ag}(\text{E}_a)_2]\text{CF}_3\text{SO}_3$  9

<Spectrum>

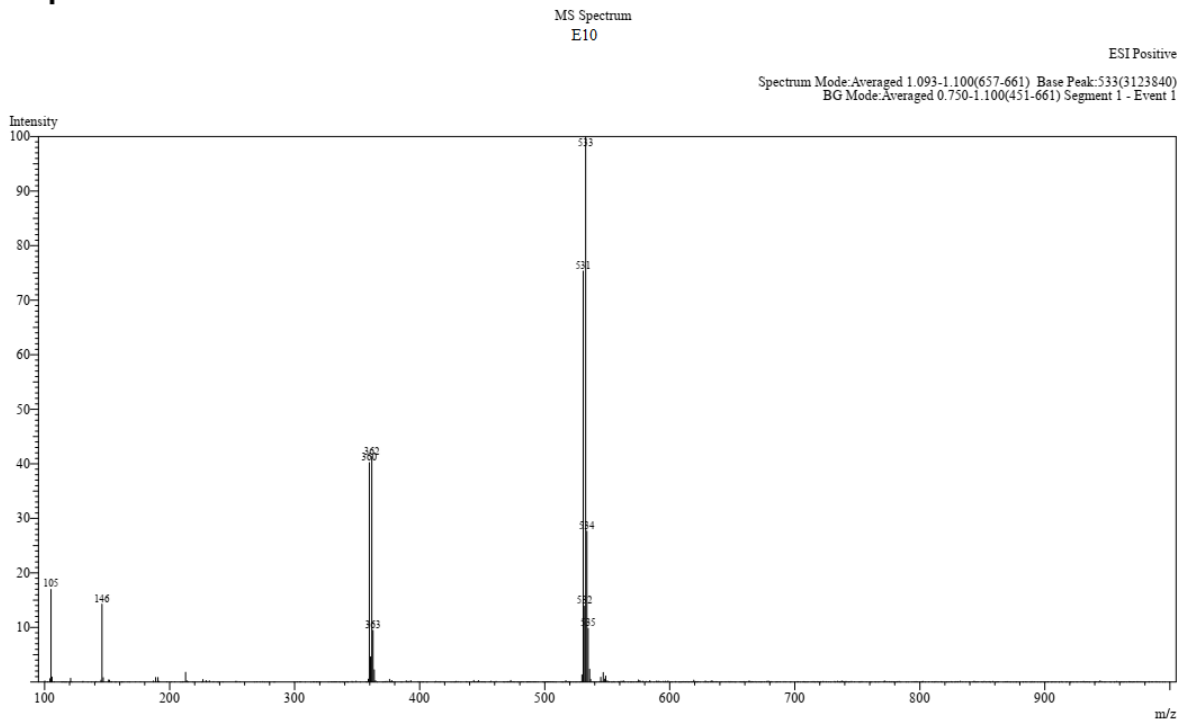

Figure S137:  $[\text{Ag}(\text{E}_b)_2]\text{CF}_3\text{SO}_3$  10

==== Shimadzu LabSolutions Data Report ====

<Spectrum>

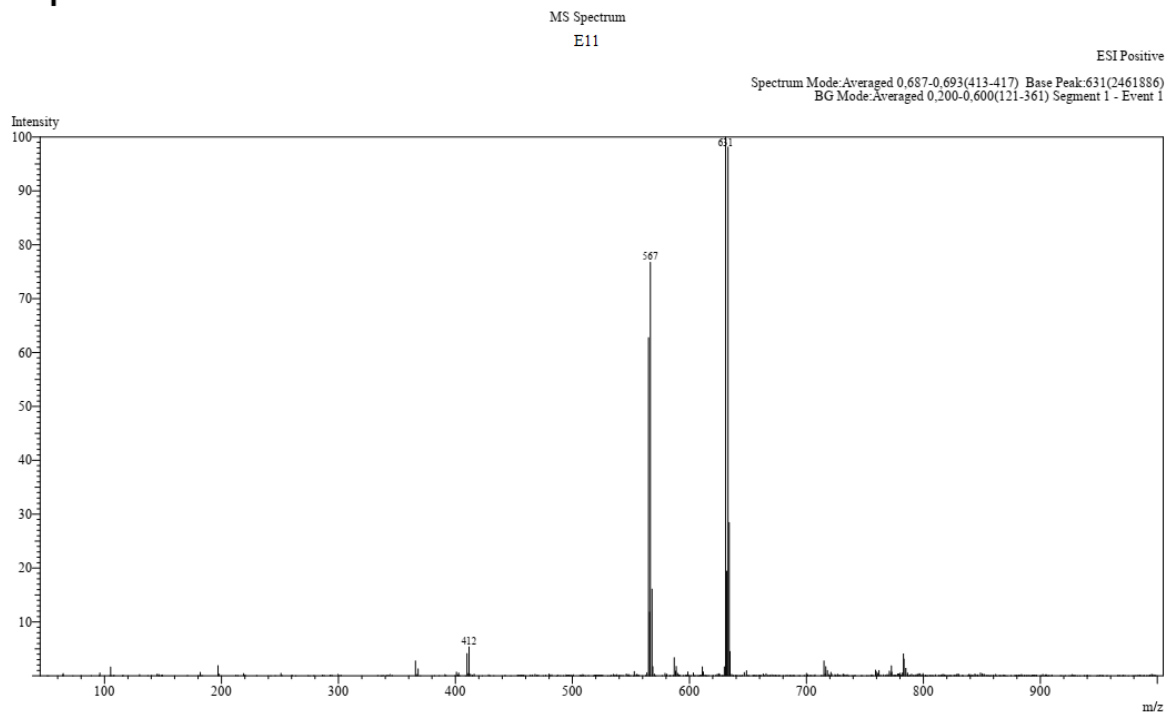

Figure S138:  $[Ag(E_c)_2]CF_3SO_3$  11

==== Shimadzu LabSolutions Data Report ====

<Spectrum>

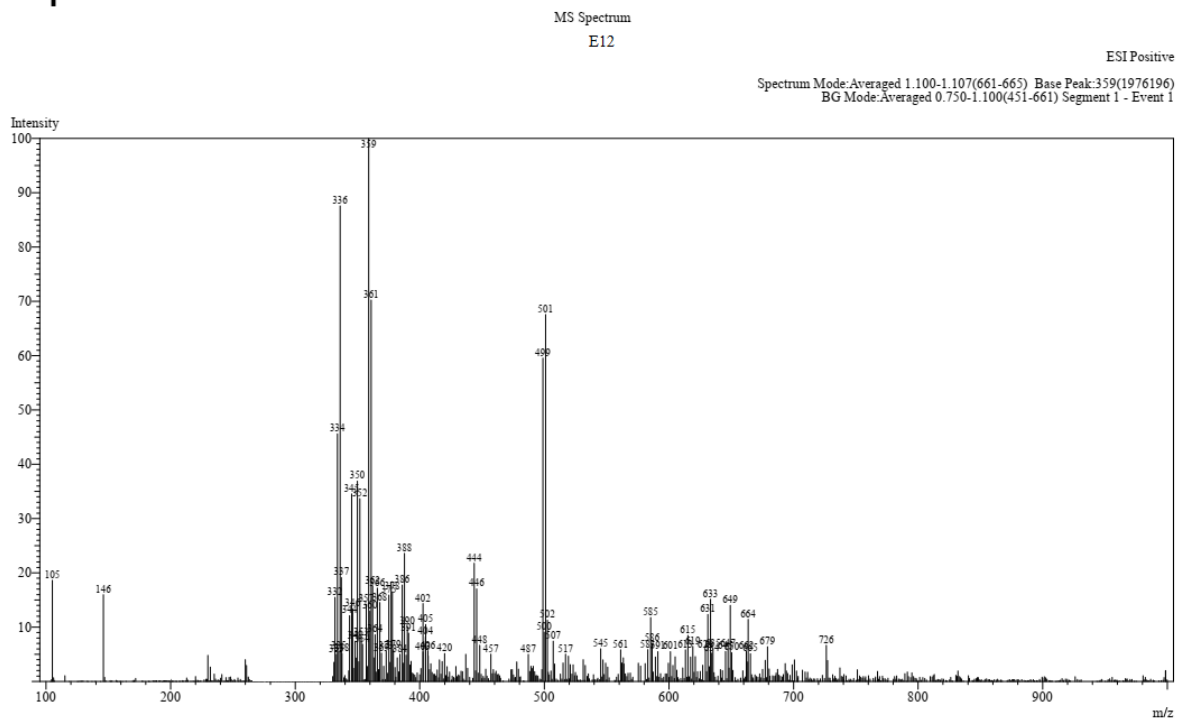

Figure S139:  $[Ag(E_d)_2]CF_3SO_3$  12
